# Supplementary material
Source: HighWire-hosted journal article supplement (https://jmg.bmj.com/content/55/7/459)
Supplement: inline-supplementary-material-8 [file inline-supplementary-material-8.pdf]

## Supplementary Table S5.

Full results at the FADS1/2/3 locus for all FA x SNP combinations with p-value <0.1. Effect size and standard errors have NOT been transformed from the log() or sqrt() transformed phenotypes. Further details are in the legend below the table.

| FA | Marker Name              | rs#         | Pos      | Min Info | In Prov | In Cryp | A1 | A2 | Min Freq | Max Freq | Effect  | StdErr | P-value  | Dir |
|----|--------------------------|-------------|----------|----------|---------|---------|----|----|----------|----------|---------|--------|----------|-----|
| AA | 11:61580635-C-T          | rs174556    | 61580635 | 1        | 1       | 1       | t  | c  | 0.1697   | 0.1711   | -0.1603 | 0.025  | 1.53E-10 | --  |
| AA | 11:61582708-T-C          | rs174561    | 61582708 | 1        | 1       | 1       | t  | c  | 0.827    | 0.8288   | 0.1584  | 0.0248 | 1.72E-10 | ++  |
| AA | rs174549                 | rs174549    | 61571382 | 1        | 1       | 1       | a  | g  | 0.1712   | 0.173    | -0.1584 | 0.0248 | 1.73E-10 | --  |
| AA | rs174555:61579760:T:C    | rs174555    | 61579760 | 1        | 1       | 1       | t  | c  | 0.827    | 0.8288   | 0.1584  | 0.0248 | 1.73E-10 | ++  |
| AA | rs174557:61581368:A:G    | rs174557    | 61581368 | 0.999    | 1       | 1       | a  | g  | 0.827    | 0.8285   | 0.1581  | 0.0248 | 1.77E-10 | ++  |
| AA | rs174544:61567753:C:A    | rs174544    | 61567753 | 0.997    | 1       | 1       | a  | c  | 0.1712   | 0.1719   | -0.1588 | 0.0249 | 1.84E-10 | --  |
| AA | rs28456:61589481:A:G     | rs28456     | 61589481 | 1        | 1       | 1       | a  | g  | 0.827    | 0.8278   | 0.1569  | 0.0247 | 2.30E-10 | ++  |
| AA | 11:61581764-T-C          | rs174560    | 61581764 | 1        | 1       | 1       | t  | c  | 0.827    | 0.8278   | 0.1569  | 0.0247 | 2.30E-10 | ++  |
| AA | rs174548                 | rs174548    | 61571348 | 1        | 1       | 1       | c  | g  | 0.827    | 0.8278   | 0.1569  | 0.0247 | 2.30E-10 | ++  |
| AA | 11:61605499-T-A          | rs174578    | 61605499 | 1        | 1       | 1       | a  | t  | 0.1844   | 0.192    | -0.1475 | 0.0236 | 3.89E-10 | --  |
| AA | rs174577                 | rs174577    | 61604814 | 1        | 1       | 1       | a  | c  | 0.1844   | 0.192    | -0.1475 | 0.0236 | 3.89E-10 | --  |
| AA | 11:61593816-C-T          | rs174568    | 61593816 | 1        | 1       | 1       | t  | c  | 0.1826   | 0.1827   | -0.1498 | 0.0243 | 7.09E-10 | --  |
| AA | rs174550                 | rs174550    | 61571478 | 1        | 1       | 1       | t  | c  | 0.8154   | 0.8156   | 0.148   | 0.0241 | 7.80E-10 | ++  |
| AA | rs174546                 | rs174546    | 61569830 | 1        | 1       | 1       | t  | c  | 0.1844   | 0.1846   | -0.148  | 0.0241 | 7.80E-10 | --  |
| AA | 11:61569306-C-G          | rs174545    | 61569306 | 1        | 1       | 1       | c  | g  | 0.8154   | 0.8156   | 0.148   | 0.0241 | 7.80E-10 | ++  |
| AA | rs174547                 | rs174547    | 61570783 | 1        | 1       | 1       | t  | c  | 0.8154   | 0.8156   | 0.148   | 0.0241 | 7.80E-10 | ++  |
| AA | rs174551:61573684:T:C    | rs174551    | 61573684 | 1        | 1       | 1       | t  | c  | 0.8153   | 0.8156   | 0.148   | 0.0241 | 7.93E-10 | ++  |
| AA | rs174553:61575158:A:G    | rs174553    | 61575158 | 0.999    | 1       | 1       | a  | g  | 0.8153   | 0.8156   | 0.1479  | 0.0241 | 7.99E-10 | ++  |
| AA | 11:61606683-G-A          | rs174581    | 61606683 | 1        | 1       | 1       | a  | g  | 0.1866   | 0.1948   | -0.1436 | 0.0234 | 8.32E-10 | --  |
| AA | rs3834458:61594920:CT:C  | rs774882452 | 61594920 | 0.996    | 1       | 1       | ct | c  | 0.8157   | 0.8165   | 0.1481  | 0.0242 | 9.19E-10 | ++  |
| AA | rs35473591:61586328:C:CT | rs35473591  | 61586328 | 1        | 1       | 1       | ct | c  | 0.1844   | 0.1854   | -0.1473 | 0.0241 | 9.28E-10 | --  |
| AA | 11:61585144-A-G          | rs174562    | 61585144 | 1        | 1       | 1       | a  | g  | 0.8145   | 0.8156   | 0.1472  | 0.0241 | 9.47E-10 | ++  |

|    |                           |           |          |       |   |   |    |     |        |        |         |        |          |    |
|----|---------------------------|-----------|----------|-------|---|---|----|-----|--------|--------|---------|--------|----------|----|
| AA | rs174574                  | rs174574  | 61600342 | 1     | 1 | 1 | a  | c   | 0.1844 | 0.1874 | -0.1454 | 0.0238 | 1.05E-09 | -- |
| AA | rs5792235:61596322:CA:C   | -         | 61596322 | 0.998 | 1 | 1 | ca | c   | 0.8131 | 0.8156 | 0.1459  | 0.0239 | 1.10E-09 | ++ |
| AA | rs174567:61593005:A:G     | rs174567  | 61593005 | 0.998 | 1 | 1 | a  | g   | 0.8151 | 0.8152 | 0.1461  | 0.024  | 1.14E-09 | ++ |
| AA | rs174576                  | rs174576  | 61603510 | 1     | 1 | 1 | a  | c   | 0.1866 | 0.1976 | -0.1431 | 0.0235 | 1.14E-09 | -- |
| AA | rs1535                    | rs1535    | 61597972 | 1     | 1 | 1 | a  | g   | 0.811  | 0.8156 | 0.1451  | 0.0239 | 1.20E-09 | ++ |
| AA | rs174564:61588305:A:G     | rs174564  | 61588305 | 1     | 1 | 1 | a  | g   | 0.8146 | 0.8152 | 0.1458  | 0.024  | 1.24E-09 | ++ |
| AA | 11:61606642-A-G           | rs174580  | 61606642 | 1     | 1 | 1 | a  | g   | 0.8005 | 0.8108 | 0.1406  | 0.0233 | 1.72E-09 | ++ |
| AA | rs99780                   | rs99780   | 61596633 | 1     | 1 | 1 | t  | c   | 0.1848 | 0.1885 | -0.1432 | 0.0241 | 2.75E-09 | -- |
| AA | rs174559:61581656:G:A     | rs174559  | 61581656 | 0.999 | 1 | 1 | a  | g   | 0.1566 | 0.1611 | -0.1478 | 0.0258 | 9.52E-09 | -- |
| AA | rs7394579:61581450:A:G    | rs7394579 | 61581450 | 0.984 | 1 | 1 | a  | g   | 0.8415 | 0.8467 | 0.1498  | 0.0262 | 1.12E-08 | ++ |
| AA | rs174570                  | rs174570  | 61597212 | 1     | 1 | 1 | t  | c   | 0.1279 | 0.1324 | -0.1622 | 0.0287 | 1.54E-08 | -- |
| AA | rs174565:61591636:C:G     | rs174565  | 61591636 | 0.997 | 1 | 1 | c  | g   | 0.8668 | 0.8706 | 0.1594  | 0.0284 | 2.10E-08 | ++ |
| AA | rs4246215                 | rs4246215 | 61564299 | 0.995 | 1 | 1 | t  | g   | 0.1899 | 0.1976 | -0.1312 | 0.0235 | 2.36E-08 | -- |
| AA | rs174538                  | rs174538  | 61560081 | 0.998 | 1 | 1 | a  | g   | 0.1683 | 0.1741 | -0.1368 | 0.0249 | 3.92E-08 | -- |
| AA | 11:61557826-T-C           | rs102274  | 61557826 | 1     | 1 | 1 | t  | c   | 0.7982 | 0.8035 | 0.1304  | 0.024  | 5.41E-08 | ++ |
| AA | rs2727270:61603237:C:T    | rs2727270 | 61603237 | 0.998 | 1 | 1 | t  | c   | 0.0765 | 0.1012 | -0.172  | 0.0317 | 5.64E-08 | -- |
| AA | 11:61603358-A-T           | rs2727271 | 61603358 | 1     | 1 | 1 | a  | t   | 0.8983 | 0.9235 | 0.172   | 0.0317 | 5.68E-08 | ++ |
| AA | 11:61592362-A-G           | rs174566  | 61592362 | 1     | 1 | 1 | a  | g   | 0.7774 | 0.7868 | 0.1203  | 0.0223 | 6.85E-08 | ++ |
| AA | rs102275                  | rs102275  | 61557803 | 1     | 1 | 1 | t  | c   | 0.7974 | 0.803  | 0.1281  | 0.0239 | 8.30E-08 | ++ |
| AA | rs174536                  | rs174536  | 61551927 | 1     | 1 | 1 | a  | c   | 0.7916 | 0.7994 | 0.1266  | 0.0236 | 8.31E-08 | ++ |
| AA | 11:61604967-C-T           | rs2072113 | 61604967 | 1     | 1 | 1 | t  | c   | 0.0757 | 0.1017 | -0.1679 | 0.0315 | 1.01E-07 | -- |
| AA | rs4564341:61573540:C:T    | rs4564341 | 61573540 | 0.935 | 1 | 1 | t  | c   | 0.0606 | 0.0673 | -0.2238 | 0.0422 | 1.13E-07 | -- |
| AA | rs174583                  | rs174583  | 61609750 | 1     | 1 | 1 | t  | c   | 0.2006 | 0.2089 | -0.1193 | 0.0226 | 1.26E-07 | -- |
| AA | rs57668028:61591995:GAA:G | -         | 61591995 | 0.982 | 1 | 1 | g  | gaa | 0.163  | 0.1686 | -0.1338 | 0.0253 | 1.30E-07 | -- |
| AA | 11:61604782-A-T           | rs2524299 | 61604782 | 1     | 1 | 1 | a  | t   | 0.8992 | 0.9235 | 0.1655  | 0.0315 | 1.47E-07 | ++ |
| AA | rs2072114                 | rs2072114 | 61605215 | 1     | 1 | 1 | a  | g   | 0.8992 | 0.9235 | 0.1653  | 0.0315 | 1.53E-07 | ++ |
| AA | rs174535                  | rs174535  | 61551356 | 1     | 1 | 1 | t  | c   | 0.7936 | 0.803  | 0.1252  | 0.0239 | 1.64E-07 | ++ |
| AA | rs174537                  | rs174537  | 61552680 | 1     | 1 | 1 | t  | g   | 0.194  | 0.2002 | -0.1252 | 0.0239 | 1.67E-07 | -- |
| AA | rs174533:61549025:G:A     | rs174533  | 61549025 | 0.986 | 1 | 1 | a  | g   | 0.1988 | 0.2053 | -0.1247 | 0.0239 | 1.76E-07 | -- |

|      |                                    |             |          |       |   |   |          |             |        |        |         |        |          |    |
|------|------------------------------------|-------------|----------|-------|---|---|----------|-------------|--------|--------|---------|--------|----------|----|
| AA   | rs108499:61547237:C:T              | rs108499    | 61547237 | 0.985 | 1 | 1 | t        | c           | 0.1734 | 0.1744 | -0.131  | 0.0251 | 1.90E-07 | -- |
| AA   | 11:61548559-A-G                    | rs509360    | 61548559 | 1     | 1 | 1 | a        | g           | 0.7226 | 0.736  | 0.1077  | 0.021  | 3.00E-07 | ++ |
| AA   | 11:61549458-A-G                    | rs174534    | 61549458 | 1     | 1 | 1 | a        | g           | 0.813  | 0.8152 | 0.1161  | 0.0244 | 1.97E-06 | ++ |
| AA   | rs2524296:61601378:C:T             | rs2524296   | 61601378 | 0.997 | 1 | 1 | t        | c           | 0.0634 | 0.0773 | -0.1739 | 0.0367 | 2.10E-06 | -- |
| AA   | rs2845574:61601872:C:T             | rs2845574   | 61601872 | 0.997 | 1 | 1 | t        | c           | 0.0634 | 0.0774 | -0.1733 | 0.0366 | 2.24E-06 | -- |
| AA   | rs2845573:61601908:A:G             | rs2845573   | 61601908 | 0.997 | 1 | 1 | a        | g           | 0.9226 | 0.9366 | 0.1732  | 0.0366 | 2.26E-06 | ++ |
| AA   | rs138766446:61602458:CCCA:C        | rs765564188 | 61602458 | 0.992 | 1 | 1 | cc<br>ca | c           | 0.9218 | 0.9365 | 0.1726  | 0.0365 | 2.29E-06 | ++ |
| DPA6 | 11:61604782-A-T                    | rs2524299   | 61604782 | 1     | 1 | 1 | a        | t           | 0.8992 | 0.9235 | 0.2403  | 0.0529 | 5.53E-06 | ++ |
| AA   | rs2727265:61609004:C:A             | rs2727265   | 61609004 | 0.989 | 1 | 1 | a        | c           | 0.0635 | 0.0764 | -0.1649 | 0.0365 | 6.17E-06 | -- |
| DPA6 | rs2727270:61603237:C:T             | rs2727270   | 61603237 | 0.998 | 1 | 1 | t        | c           | 0.0765 | 0.1012 | -0.2379 | 0.0527 | 6.32E-06 | -- |
| DPA6 | 11:61603358-A-T                    | rs2727271   | 61603358 | 1     | 1 | 1 | a        | t           | 0.8983 | 0.9235 | 0.2375  | 0.0527 | 6.49E-06 | ++ |
| DPA6 | 11:61604967-C-T                    | rs2072113   | 61604967 | 1     | 1 | 1 | t        | c           | 0.0757 | 0.1017 | -0.2336 | 0.0527 | 9.26E-06 | -- |
| DPA6 | 11:61605499-T-A                    | rs174578    | 61605499 | 1     | 1 | 1 | a        | t           | 0.1844 | 0.192  | -0.166  | 0.0375 | 9.35E-06 | -- |
| DPA6 | rs174577                           | rs174577    | 61604814 | 1     | 1 | 1 | a        | c           | 0.1844 | 0.192  | -0.166  | 0.0375 | 9.35E-06 | -- |
| DPA6 | rs174576                           | rs174576    | 61603510 | 1     | 1 | 1 | a        | c           | 0.1866 | 0.1976 | -0.1617 | 0.037  | 1.27E-05 | -- |
| DPA6 | rs2072114                          | rs2072114   | 61605215 | 1     | 1 | 1 | a        | g           | 0.8992 | 0.9235 | 0.2307  | 0.0529 | 1.30E-05 | ++ |
| DPA6 | 11:61606683-G-A                    | rs174581    | 61606683 | 1     | 1 | 1 | a        | g           | 0.1866 | 0.1948 | -0.1592 | 0.0373 | 1.96E-05 | -- |
| DPA6 | 11:61606642-A-G                    | rs174580    | 61606642 | 1     | 1 | 1 | a        | g           | 0.8005 | 0.8108 | 0.1573  | 0.0369 | 1.98E-05 | ++ |
| AA   | rs174594:61619829:C:A              | rs174594    | 61619829 | 0.997 | 1 | 1 | a        | c           | 0.7473 | 0.7596 | 0.0895  | 0.021  | 2.08E-05 | ++ |
| DPA6 | rs28456:61589481:A:G               | rs28456     | 61589481 | 1     | 1 | 1 | a        | g           | 0.827  | 0.8278 | 0.1673  | 0.0393 | 2.11E-05 | ++ |
| DPA6 | 11:61581764-T-C                    | rs174560    | 61581764 | 1     | 1 | 1 | t        | c           | 0.827  | 0.8278 | 0.1673  | 0.0393 | 2.11E-05 | ++ |
| DPA6 | rs174548                           | rs174548    | 61571348 | 1     | 1 | 1 | c        | g           | 0.827  | 0.8278 | 0.1673  | 0.0393 | 2.11E-05 | ++ |
| DPA6 | 11:61580635-C-T                    | rs174556    | 61580635 | 1     | 1 | 1 | t        | c           | 0.1697 | 0.1711 | -0.1679 | 0.0395 | 2.15E-05 | -- |
| DPA6 | rs99780                            | rs99780     | 61596633 | 1     | 1 | 1 | t        | c           | 0.1848 | 0.1885 | -0.1604 | 0.0378 | 2.22E-05 | -- |
| DPA6 | rs174574                           | rs174574    | 61600342 | 1     | 1 | 1 | a        | c           | 0.1844 | 0.1874 | -0.1592 | 0.0376 | 2.29E-05 | -- |
| AA   | 11:61618608-A-G                    | rs174592    | 61618608 | 1     | 1 | 1 | a        | g           | 0.7478 | 0.7589 | 0.0886  | 0.021  | 2.53E-05 | ++ |
| AA   | rs143352979:61620628:AAACA<br>AC:A | -           | 61620628 | 0.934 | 1 | 1 | a        | aaac<br>aac | 0.2703 | 0.2915 | -0.0875 | 0.0208 | 2.59E-05 | -- |
| DPA6 | 11:61582708-T-C                    | rs174561    | 61582708 | 1     | 1 | 1 | t        | c           | 0.827  | 0.8288 | 0.1647  | 0.0393 | 2.83E-05 | ++ |

|         |                          |             |          |       |   |   |    |   |        |        |         |        |           |    |
|---------|--------------------------|-------------|----------|-------|---|---|----|---|--------|--------|---------|--------|-----------|----|
| DPA6    | rs174549                 | rs174549    | 61571382 | 1     | 1 | 1 | a  | g | 0.1712 | 0.173  | -0.1647 | 0.0393 | 2.84E-05  | -- |
| DPA6    | rs174555:61579760:T:C    | rs174555    | 61579760 | 1     | 1 | 1 | t  | c | 0.827  | 0.8288 | 0.1647  | 0.0393 | 2.84E-05  | ++ |
| DPA6    | rs174544:61567753:C:A    | rs174544    | 61567753 | 0.997 | 1 | 1 | a  | c | 0.1712 | 0.1719 | -0.1652 | 0.0395 | 2.87E-05  | -- |
| DPA6    | rs174557:61581368:A:G    | rs174557    | 61581368 | 0.999 | 1 | 1 | a  | g | 0.827  | 0.8285 | 0.1644  | 0.0393 | 2.89E-05  | ++ |
| DPA6    | 11:61593816-C-T          | rs174568    | 61593816 | 1     | 1 | 1 | t  | c | 0.1826 | 0.1827 | -0.1607 | 0.0384 | 2.90E-05  | -- |
| SQRAT63 | rs57535397:61641889:G:A  | rs57535397  | 61641889 | 0.911 | 1 | 1 | a  | g | 0.0607 | 0.0716 | -0.3564 | 0.0856 | 3.13E-05  | -- |
| DPA6    | rs174567:61593005:A:G    | rs174567    | 61593005 | 0.998 | 1 | 1 | a  | g | 0.8151 | 0.8152 | 0.1583  | 0.038  | 3.15E-05  | ++ |
| DPA6    | rs174564:61588305:A:G    | rs174564    | 61588305 | 1     | 1 | 1 | a  | g | 0.8146 | 0.8152 | 0.158   | 0.038  | 3.24E-05  | ++ |
| DPA6    | rs5792235:61596322:CA:C  | -           | 61596322 | 0.998 | 1 | 1 | ca | c | 0.8131 | 0.8156 | 0.1576  | 0.038  | 3.41E-05  | ++ |
| DPA6    | rs3834458:61594920:CT:C  | rs774882452 | 61594920 | 0.996 | 1 | 1 | ct | c | 0.8157 | 0.8165 | 0.1588  | 0.0384 | 3.50E-05  | ++ |
| DPA6    | rs174583                 | rs174583    | 61609750 | 1     | 1 | 1 | t  | c | 0.2006 | 0.2089 | -0.149  | 0.036  | 3.50E-05  | -- |
| DPA6    | rs174550                 | rs174550    | 61571478 | 1     | 1 | 1 | t  | c | 0.8154 | 0.8156 | 0.1575  | 0.0382 | 3.77E-05  | ++ |
| DPA6    | rs174546                 | rs174546    | 61569830 | 1     | 1 | 1 | t  | c | 0.1844 | 0.1846 | -0.1575 | 0.0382 | 3.77E-05  | -- |
| DPA6    | 11:61569306-C-G          | rs174545    | 61569306 | 1     | 1 | 1 | c  | g | 0.8154 | 0.8156 | 0.1575  | 0.0382 | 3.77E-05  | ++ |
| DPA6    | rs174547                 | rs174547    | 61570783 | 1     | 1 | 1 | t  | c | 0.8154 | 0.8156 | 0.1575  | 0.0382 | 3.77E-05  | ++ |
| DPA6    | rs174551:61573684:T:C    | rs174551    | 61573684 | 1     | 1 | 1 | t  | c | 0.8153 | 0.8156 | 0.1575  | 0.0382 | 3.79E-05  | ++ |
| DPA6    | rs174553:61575158:A:G    | rs174553    | 61575158 | 0.999 | 1 | 1 | a  | g | 0.8153 | 0.8156 | 0.1574  | 0.0382 | 3.80E-05  | ++ |
| DPA6    | rs35473591:61586328:C:CT | rs35473591  | 61586328 | 1     | 1 | 1 | ct | c | 0.1844 | 0.1854 | -0.1569 | 0.0382 | 3.95E-05  | -- |
| DPA6    | 11:61585144-A-G          | rs174562    | 61585144 | 1     | 1 | 1 | a  | g | 0.8145 | 0.8156 | 0.1568  | 0.0382 | 4.01E-05  | ++ |
| DPA6    | rs1535                   | rs1535      | 61597972 | 1     | 1 | 1 | a  | g | 0.811  | 0.8156 | 0.1547  | 0.0379 | 4.43E-05  | ++ |
| AA      | 11:61621556-G-C          | rs174599    | 61621556 | 0.998 | 1 | 1 | c  | g | 0.2431 | 0.2595 | -0.0832 | 0.0208 | 6.45E-05  | -- |
| AA      | rs2526680:61611216:C:T   | rs2526680   | 61611216 | 0.969 | 1 | 1 | t  | c | 0.0679 | 0.0804 | -0.1372 | 0.0347 | 7.75E-05  | -- |
| DPA6    | rs174537                 | rs174537    | 61552680 | 1     | 1 | 1 | t  | g | 0.194  | 0.2002 | -0.1503 | 0.0384 | 8.98E-05  | -- |
| AA      | rs174601                 | rs174601    | 61623140 | 1     | 1 | 1 | t  | c | 0.2455 | 0.265  | -0.0811 | 0.0207 | 9.03E-05  | -- |
| DPA6    | rs102275                 | rs102275    | 61557803 | 1     | 1 | 1 | t  | c | 0.7974 | 0.803  | 0.1514  | 0.0387 | 9.14E-05  | ++ |
| DPA6    | 11:61592362-A-G          | rs174566    | 61592362 | 1     | 1 | 1 | a  | g | 0.7774 | 0.7868 | 0.1371  | 0.0354 | 0.0001052 | ++ |
| DPA6    | 11:61557826-T-C          | rs102274    | 61557826 | 1     | 1 | 1 | t  | c | 0.7982 | 0.8035 | 0.1503  | 0.0389 | 0.0001114 | ++ |
| DPA6    | rs174536                 | rs174536    | 61551927 | 1     | 1 | 1 | a  | c | 0.7916 | 0.7994 | 0.1454  | 0.0383 | 0.0001443 | ++ |
| DPA6    | rs174533:61549025:G:A    | rs174533    | 61549025 | 0.986 | 1 | 1 | a  | g | 0.1988 | 0.2053 | -0.1459 | 0.0387 | 0.0001655 | -- |

|         |                           |             |          |       |   |   |    |   |        |        |         |        |           |    |
|---------|---------------------------|-------------|----------|-------|---|---|----|---|--------|--------|---------|--------|-----------|----|
| AA      | 11:61600327-G-A           | rs174573    | 61600327 | 1     | 1 | 1 | a  | g | 0.1115 | 0.12   | -0.1112 | 0.0296 | 0.0001737 | -- |
| AA      | rs174575                  | rs174575    | 61602003 | 1     | 1 | 1 | c  | g | 0.8792 | 0.8885 | 0.1093  | 0.0295 | 0.0002127 | ++ |
| DHA     | rs57535397:61641889:G:A   | rs57535397  | 61641889 | 0.911 | 1 | 1 | a  | g | 0.0607 | 0.0716 | 0.1916  | 0.0518 | 0.0002154 | ++ |
| AA      | 11:61621194-G-A           | rs174598    | 61621194 | 1     | 1 | 1 | a  | g | 0.2131 | 0.2167 | -0.0814 | 0.0221 | 0.000228  | -- |
| AA      | rs149597144:61602460:CA:C | rs199985711 | 61602460 | 0.978 | 1 | 1 | ca | c | 0.8802 | 0.8863 | 0.1078  | 0.0294 | 0.0002442 | ++ |
| AA      | rs2851682                 | rs2851682   | 61616012 | 0.983 | 1 | 1 | a  | g | 0.9162 | 0.9209 | 0.1182  | 0.0322 | 0.0002449 | ++ |
| DPA6    | rs174570                  | rs174570    | 61597212 | 1     | 1 | 1 | t  | c | 0.1279 | 0.1324 | -0.1585 | 0.0433 | 0.0002469 | -- |
| AA      | rs174572                  | rs174572    | 61598288 | 1     | 1 | 1 | t  | c | 0.1115 | 0.1208 | -0.1086 | 0.0297 | 0.0002512 | -- |
| DPA6    | rs4564341:61573540:C:T    | rs4564341   | 61573540 | 0.935 | 1 | 1 | t  | c | 0.0606 | 0.0673 | -0.2496 | 0.0683 | 0.0002551 | -- |
| AA      | 11:61622227-T-C           | rs174600    | 61622227 | 0.996 | 1 | 1 | t  | c | 0.7814 | 0.7847 | 0.0797  | 0.022  | 0.000289  | ++ |
| DPA6    | rs4246215                 | rs4246215   | 61564299 | 0.995 | 1 | 1 | t  | g | 0.1899 | 0.1976 | -0.1374 | 0.0379 | 0.0002942 | -- |
| DPA6    | rs174535                  | rs174535    | 61551356 | 1     | 1 | 1 | t  | c | 0.7936 | 0.803  | 0.1403  | 0.0388 | 0.000303  | ++ |
| DPA6    | rs174565:61591636:C:G     | rs174565    | 61591636 | 0.997 | 1 | 1 | c  | g | 0.8668 | 0.8706 | 0.1548  | 0.0431 | 0.0003313 | ++ |
| DPA6    | rs108499:61547237:C:T     | rs108499    | 61547237 | 0.985 | 1 | 1 | t  | c | 0.1734 | 0.1744 | -0.1439 | 0.0405 | 0.0003854 | -- |
| AA      | rs2845572:61614595:G:A    | rs2845572   | 61614595 | 0.98  | 1 | 1 | a  | g | 0.0783 | 0.084  | -0.1133 | 0.0321 | 0.0004178 | -- |
| AA      | rs174587:61612830:C:T     | rs174587    | 61612830 | 0.961 | 1 | 1 | t  | c | 0.0976 | 0.1113 | -0.1143 | 0.0325 | 0.0004308 | -- |
| AA      | rs93923:61613745:C:T      | rs93923     | 61613745 | 0.961 | 1 | 1 | t  | c | 0.0971 | 0.1119 | -0.1138 | 0.0324 | 0.0004521 | -- |
| DPA6    | rs174594:61619829:C:A     | rs174594    | 61619829 | 0.997 | 1 | 1 | a  | c | 0.7473 | 0.7596 | 0.1164  | 0.0332 | 0.0004553 | ++ |
| DPA6    | 11:61618608-A-G           | rs174592    | 61618608 | 1     | 1 | 1 | a  | g | 0.7478 | 0.7589 | 0.1161  | 0.0332 | 0.0004722 | ++ |
| DPA6    | rs2727265:61609004:C:A    | rs2727265   | 61609004 | 0.989 | 1 | 1 | a  | c | 0.0635 | 0.0764 | -0.2089 | 0.0604 | 0.0005435 | -- |
| DHA     | rs76095489:61664711:A:T   | rs76095489  | 61664711 | 0.907 | 1 | 1 | a  | t | 0.9297 | 0.9365 | -0.1693 | 0.0494 | 0.0006038 | -- |
| DPA6    | rs7394579:61581450:A:G    | rs7394579   | 61581450 | 0.984 | 1 | 1 | a  | g | 0.8415 | 0.8467 | 0.1376  | 0.041  | 0.0007892 | ++ |
| SQRAT63 | rs76095489:61664711:A:T   | rs76095489  | 61664711 | 0.907 | 1 | 1 | a  | t | 0.9297 | 0.9365 | 0.2632  | 0.0787 | 0.0008307 | ++ |
| DPA6    | 11:61621556-G-C           | rs174599    | 61621556 | 0.998 | 1 | 1 | c  | g | 0.2431 | 0.2595 | -0.1092 | 0.0327 | 0.0008348 | -- |
| DPA6    | rs2524296:61601378:C:T    | rs2524296   | 61601378 | 0.997 | 1 | 1 | t  | c | 0.0634 | 0.0773 | -0.1974 | 0.0593 | 0.0008686 | -- |
| DPA6    | rs174559:61581656:G:A     | rs174559    | 61581656 | 0.999 | 1 | 1 | a  | g | 0.1566 | 0.1611 | -0.1336 | 0.0402 | 0.0008937 | -- |
| DPA6    | rs2845574:61601872:C:T    | rs2845574   | 61601872 | 0.997 | 1 | 1 | t  | c | 0.0634 | 0.0774 | -0.1965 | 0.0592 | 0.0008999 | -- |
| DPA6    | rs2845573:61601908:A:G    | rs2845573   | 61601908 | 0.997 | 1 | 1 | a  | g | 0.9226 | 0.9366 | 0.1964  | 0.0592 | 0.0009031 | ++ |

|         |                                    |             |          |       |   |   |    |             |        |        |         |        |           |    |
|---------|------------------------------------|-------------|----------|-------|---|---|----|-------------|--------|--------|---------|--------|-----------|----|
| DPA6    | rs143352979:61620628:AAACA<br>AC:A | -           | 61620628 | 0.934 | 1 | 1 | a  | aaac<br>aac | 0.2703 | 0.2915 | -0.1084 | 0.0327 | 0.0009128 | -- |
| DPA6    | rs138766446:61602458:CCCA:C        | rs765564188 | 61602458 | 0.992 | 1 | 1 | ca | c           | 0.9218 | 0.9365 | 0.1943  | 0.059  | 0.0009833 | ++ |
| DPA6    | rs174538                           | rs174538    | 61560081 | 0.998 | 1 | 1 | a  | g           | 0.1683 | 0.1741 | -0.1293 | 0.0393 | 0.001011  | -- |
| DPA6    | 11:61548559-A-G                    | rs509360    | 61548559 | 1     | 1 | 1 | a  | g           | 0.7226 | 0.736  | 0.1077  | 0.0332 | 0.00119   | ++ |
| AA      | rs174579                           | rs174579    | 61605613 | 0.998 | 1 | 1 | t  | c           | 0.0912 | 0.1069 | -0.1024 | 0.032  | 0.001348  | -- |
| SQRAT63 | rs72643557:61579427:C:T            | rs72643557  | 61579427 | 0.936 | 1 | 1 | t  | c           | 0.0607 | 0.0734 | -0.2562 | 0.0803 | 0.001417  | -- |
| DPA6    | rs57668028:61591995:GAA:G          | -           | 61591995 | 0.982 | 1 | 1 | g  | gaa         | 0.163  | 0.1686 | -0.1256 | 0.0397 | 0.001567  | -- |
| DPA6    | rs174601                           | rs174601    | 61623140 | 1     | 1 | 1 | t  | c           | 0.2455 | 0.265  | -0.1031 | 0.0327 | 0.001644  | -- |
| AA      | 11:61579463-A-G                    | rs174554    | 61579463 | 1     | 1 | 1 | a  | g           | 0.8156 | 0.8156 | 0.0935  | 0.0297 | 0.001649  | ?+ |
| STE     | rs174465:61658800:C:T              | rs174465    | 61658800 | 0.98  | 1 | 1 | t  | c           | 0.6222 | 0.628  | -0.0487 | 0.0157 | 0.001888  | -- |
| DPA6    | rs2526680:61611216:C:T             | rs2526680   | 61611216 | 0.969 | 1 | 1 | t  | c           | 0.0679 | 0.0804 | -0.1809 | 0.0582 | 0.001892  | -- |
| DHA     | 11:61620274-T-C                    | rs72643559  | 61620274 | 1     | 1 | 1 | t  | c           | 0.9312 | 0.9413 | -0.1541 | 0.0498 | 0.001962  | -- |
| AA      | rs174591                           | rs174591    | 61617676 | 0.988 | 1 | 1 | a  | t           | 0.1468 | 0.1536 | -0.082  | 0.0267 | 0.002147  | -- |
| STE     | rs174458:61656995:C:T              | rs174458    | 61656995 | 1     | 1 | 1 | t  | c           | 0.6214 | 0.6259 | -0.0474 | 0.0155 | 0.002214  | -- |
| DPA6    | 11:61549458-A-G                    | rs174534    | 61549458 | 1     | 1 | 1 | a  | g           | 0.813  | 0.8152 | 0.1196  | 0.0391 | 0.002223  | ++ |
| AA      | 11:61624181-T-C                    | rs97384     | 61624181 | 1     | 1 | 1 | t  | c           | 0.2561 | 0.2744 | -0.0606 | 0.02   | 0.00245   | -- |
| SQRAT63 | 11:61620274-T-C                    | rs72643559  | 61620274 | 1     | 1 | 1 | t  | c           | 0.9312 | 0.9413 | 0.2478  | 0.0823 | 0.002609  | ++ |
| STE     | 11:61657110-C-T                    | rs174460    | 61657110 | 1     | 1 | 1 | t  | c           | 0.6207 | 0.6262 | -0.0466 | 0.0155 | 0.002679  | -- |
| AA      | rs174582                           | rs174582    | 61607168 | 1     | 1 | 1 | a  | g           | 0.8891 | 0.9021 | 0.0924  | 0.0312 | 0.003048  | ++ |
| AA      | rs174593                           | rs174593    | 61618831 | 1     | 1 | 1 | t  | c           | 0.8414 | 0.852  | 0.077   | 0.0264 | 0.003521  | ++ |
| STE     | rs174463:61657838:G:A              | rs174463    | 61657838 | 0.988 | 1 | 1 | a  | g           | 0.6465 | 0.6513 | -0.0455 | 0.0156 | 0.003566  | -- |
| STE     | rs1000778                          | rs1000778   | 61655305 | 1     | 1 | 1 | a  | g           | 0.3391 | 0.3483 | 0.0465  | 0.016  | 0.003786  | ++ |
| STE     | rs174461:61657401:A:C              | rs174461    | 61657401 | 0.993 | 1 | 1 | a  | c           | 0.3485 | 0.3535 | 0.0451  | 0.0156 | 0.003876  | ++ |
| STE     | rs174457:61656975:T:C              | rs174457    | 61656975 | 0.998 | 1 | 1 | t  | c           | 0.3469 | 0.3528 | 0.0448  | 0.0156 | 0.004181  | ++ |
| DPA     | rs57535397:61641889:G:A            | rs57535397  | 61641889 | 0.911 | 1 | 1 | a  | g           | 0.0607 | 0.0716 | 0.2314  | 0.0808 | 0.004187  | ++ |
| STE     | rs174459:61657050:C:T              | rs174459    | 61657050 | 0.998 | 1 | 1 | t  | c           | 0.6472 | 0.6527 | -0.0448 | 0.0156 | 0.004204  | -- |
| EDA     | rs2526678:61623793:G:A             | rs2526678   | 61623793 | 0.95  | 1 | 1 | a  | g           | 0.0868 | 0.0871 | 0.138   | 0.0482 | 0.004214  | ++ |
| PLA     | rs174448                           | rs174448    | 61639573 | 1     | 1 | 1 | a  | g           | 0.6442 | 0.6511 | -0.1173 | 0.041  | 0.00423   | -- |

|         |                          |            |          |       |   |   |   |    |        |        |         |        |          |    |
|---------|--------------------------|------------|----------|-------|---|---|---|----|--------|--------|---------|--------|----------|----|
| STE     | rs1295988:61656658:A:C   | rs1295988  | 61656658 | 0.998 | 1 | 1 | a | c  | 0.3467 | 0.3528 | 0.0448  | 0.0157 | 0.004245 | ++ |
| STE     | rs5792240:61656541:A:AT  | rs5792240  | 61656541 | 0.998 | 1 | 1 | a | at | 0.3467 | 0.3528 | 0.0448  | 0.0157 | 0.004272 | ++ |
| STE     | rs36047269:61656254:T:TC | rs36047269 | 61656254 | 0.997 | 1 | 1 | t | tc | 0.3466 | 0.3528 | 0.0447  | 0.0157 | 0.004332 | ++ |
| STE     | rs174456:61656182:C:A    | rs174456   | 61656182 | 0.997 | 1 | 1 | a | c  | 0.6472 | 0.6535 | -0.0447 | 0.0157 | 0.004351 | -- |
| DHA     | rs72643557:61579427:C:T  | rs72643557 | 61579427 | 0.936 | 1 | 1 | t | c  | 0.0607 | 0.0734 | 0.1403  | 0.0493 | 0.004467 | ++ |
| STE     | rs174464_61657926        | rs174464   | 61657926 | 0.987 | 1 | 1 | a | g  | 0.3487 | 0.358  | 0.0447  | 0.0157 | 0.004471 | ++ |
| AA      | rs174589:61615803:C:G    | rs174589   | 61615803 | 0.973 | 1 | 1 | c | g  | 0.8774 | 0.8859 | 0.0844  | 0.0297 | 0.004555 | ++ |
| DGLA    | rs174582                 | rs174582   | 61607168 | 1     | 1 | 1 | a | g  | 0.8891 | 0.9021 | -0.1239 | 0.0439 | 0.0048   | -- |
| STE     | rs174466:61659296:A:G    | rs174466   | 61659296 | 0.966 | 1 | 1 | a | g  | 0.359  | 0.3611 | 0.0451  | 0.016  | 0.004815 | ++ |
| STE     | rs1151144:61656585:T:C   | rs1151144  | 61656585 | 0.998 | 1 | 1 | t | c  | 0.3474 | 0.3528 | 0.0441  | 0.0157 | 0.004923 | ++ |
| DHA     | rs174472:61671956:A:G    | rs174472   | 61671956 | 0.975 | 1 | 1 | a | g  | 0.2874 | 0.2929 | -0.0771 | 0.0276 | 0.005203 | -- |
| STE     | JHU_11.61657592          | rs68112215 | 61657593 | 1     | 1 | 1 | t | c  | 0.6485 | 0.6546 | -0.0437 | 0.0157 | 0.005315 | -- |
| DPA6    | 11:61621194-G-A          | rs174598   | 61621194 | 1     | 1 | 1 | a | g  | 0.2131 | 0.2167 | -0.0966 | 0.0348 | 0.005454 | -- |
| STE     | rs2727263:61618012:C:T   | rs2727263  | 61618012 | 0.975 | 1 | 1 | t | c  | 0.086  | 0.0874 | -0.0701 | 0.0253 | 0.005704 | -- |
| DPA6    | rs174593                 | rs174593   | 61618831 | 1     | 1 | 1 | t | c  | 0.8414 | 0.852  | 0.1088  | 0.0395 | 0.005839 | ++ |
| AA      | rs174590:61616977:G:C    | rs174590   | 61616977 | 0.981 | 1 | 1 | c | g  | 0.1133 | 0.122  | -0.0816 | 0.0296 | 0.005859 | -- |
| DPA6    | rs174591                 | rs174591   | 61617676 | 0.988 | 1 | 1 | a | t  | 0.1468 | 0.1536 | -0.1094 | 0.04   | 0.006238 | -- |
| EDA     | rs2727263:61618012:C:T   | rs2727263  | 61618012 | 0.975 | 1 | 1 | t | c  | 0.086  | 0.0874 | 0.1311  | 0.0481 | 0.00643  | ++ |
| SQRAT63 | rs174458:61656995:C:T    | rs174458   | 61656995 | 1     | 1 | 1 | t | c  | 0.6214 | 0.6259 | -0.0998 | 0.0369 | 0.006858 | -- |
| SQRAT63 | rs174465:61658800:C:T    | rs174465   | 61658800 | 0.98  | 1 | 1 | t | c  | 0.6222 | 0.628  | -0.1009 | 0.0373 | 0.006903 | -- |
| ARA     | rs2727263:61618012:C:T   | rs2727263  | 61618012 | 0.975 | 1 | 1 | t | c  | 0.086  | 0.0874 | -0.0881 | 0.0328 | 0.007256 | -- |
| DPA6    | rs2851682                | rs2851682  | 61616012 | 0.983 | 1 | 1 | a | g  | 0.9162 | 0.9209 | 0.148   | 0.0552 | 0.007347 | ++ |
| DPA6    | rs174596:61620734:T:C    | rs174596   | 61620734 | 0.937 | 1 | 1 | t | c  | 0.8593 | 0.8649 | 0.1158  | 0.0432 | 0.007399 | ++ |
| DPA     | rs174472:61671956:A:G    | rs174472   | 61671956 | 0.975 | 1 | 1 | a | g  | 0.2874 | 0.2929 | -0.109  | 0.0407 | 0.007483 | -- |
| DPA6    | 11:61622227-T-C          | rs174600   | 61622227 | 0.996 | 1 | 1 | t | c  | 0.7814 | 0.7847 | 0.0924  | 0.0348 | 0.007883 | ++ |
| STE     | rs526126                 | rs526126   | 61624885 | 1     | 1 | 1 | c | g  | 0.8841 | 0.895  | 0.0627  | 0.0236 | 0.007985 | ++ |
| SQRAT63 | 11:61657110-C-T          | rs174460   | 61657110 | 1     | 1 | 1 | t | c  | 0.6207 | 0.6262 | -0.0977 | 0.037  | 0.008219 | -- |
| PLA     | rs174449                 | rs174449   | 61640379 | 1     | 1 | 1 | a | g  | 0.5785 | 0.5921 | -0.1038 | 0.0395 | 0.00855  | -- |
| SQRAT63 | rs174455                 | rs174455   | 61656117 | 1     | 1 | 1 | a | g  | 0.5959 | 0.6002 | -0.0984 | 0.0375 | 0.008683 | -- |

|         |                           |             |          |       |   |   |    |   |        |        |         |        |          |    |
|---------|---------------------------|-------------|----------|-------|---|---|----|---|--------|--------|---------|--------|----------|----|
| DGLA    | rs174579                  | rs174579    | 61605613 | 0.998 | 1 | 1 | t  | c | 0.0912 | 0.1069 | 0.1172  | 0.0447 | 0.008739 | ++ |
| DTA     | 11:61580635-C-T           | rs174556    | 61580635 | 1     | 1 | 1 | t  | c | 0.1697 | 0.1711 | -0.1063 | 0.0408 | 0.009112 | -- |
| DPA6    | rs149597144:61602460:CA:C | rs199985711 | 61602460 | 0.978 | 1 | 1 | ca | c | 0.8802 | 0.8863 | 0.1167  | 0.0448 | 0.009128 | ++ |
| BEH     | 11:61548559-A-G           | rs509360    | 61548559 | 1     | 1 | 1 | a  | g | 0.7226 | 0.736  | -0.0656 | 0.0253 | 0.009432 | -- |
| ARA     | rs2845572:61614595:G:A    | rs2845572   | 61614595 | 0.98  | 1 | 1 | a  | g | 0.0783 | 0.084  | -0.0851 | 0.0328 | 0.009438 | -- |
| DTA     | 11:61605499-T-A           | rs174578    | 61605499 | 1     | 1 | 1 | a  | t | 0.1844 | 0.192  | -0.1014 | 0.0392 | 0.00976  | -- |
| DTA     | rs174577                  | rs174577    | 61604814 | 1     | 1 | 1 | a  | c | 0.1844 | 0.192  | -0.1014 | 0.0392 | 0.00976  | -- |
| STE     | rs2526678:61623793:G:A    | rs2526678   | 61623793 | 0.95  | 1 | 1 | a  | g | 0.0868 | 0.0871 | -0.0651 | 0.0253 | 0.01002  | -- |
| LIG     | 11:61548559-A-G           | rs509360    | 61548559 | 1     | 1 | 1 | a  | g | 0.7226 | 0.736  | -0.0818 | 0.0318 | 0.01012  | -- |
| SQRAT63 | rs1000778                 | rs1000778   | 61655305 | 1     | 1 | 1 | a  | g | 0.3391 | 0.3483 | 0.0996  | 0.0388 | 0.0103   | ++ |
| DPA6    | rs174575                  | rs174575    | 61602003 | 1     | 1 | 1 | c  | g | 0.8792 | 0.8885 | 0.1141  | 0.0445 | 0.01033  | ++ |
| DTA     | 11:61604967-C-T           | rs2072113   | 61604967 | 1     | 1 | 1 | t  | c | 0.0757 | 0.1017 | -0.1306 | 0.051  | 0.0105   | -- |
| ALA     | rs3168072                 | rs3168072   | 61631510 | 1     | 1 | 1 | a  | t | 0.9312 | 0.9364 | -0.2569 | 0.1004 | 0.01052  | -- |
| ARA     | rs2526678:61623793:G:A    | rs2526678   | 61623793 | 0.95  | 1 | 1 | a  | g | 0.0868 | 0.0871 | -0.0842 | 0.033  | 0.01064  | -- |
| DTA     | 11:61603358-A-T           | rs2727271   | 61603358 | 1     | 1 | 1 | a  | t | 0.8983 | 0.9235 | 0.1312  | 0.0514 | 0.01066  | ++ |
| DTA     | rs2727270:61603237:C:T    | rs2727270   | 61603237 | 0.998 | 1 | 1 | t  | c | 0.0765 | 0.1012 | -0.1312 | 0.0514 | 0.01071  | -- |
| PAL     | 11:61629122-G-A           | rs174616    | 61629122 | 1     | 1 | 1 | a  | g | 0.3808 | 0.387  | -0.0314 | 0.0123 | 0.01082  | -- |
| DTA     | rs174544:61567753:C:A     | rs174544    | 61567753 | 0.997 | 1 | 1 | a  | c | 0.1712 | 0.1719 | -0.1036 | 0.0407 | 0.01104  | -- |
| DPA6    | rs2845572:61614595:G:A    | rs2845572   | 61614595 | 0.98  | 1 | 1 | a  | g | 0.0783 | 0.084  | -0.1392 | 0.0549 | 0.01124  | -- |
| DTA     | 11:61582708-T-C           | rs174561    | 61582708 | 1     | 1 | 1 | t  | c | 0.827  | 0.8288 | 0.103   | 0.0406 | 0.01125  | ++ |
| DTA     | rs174549                  | rs174549    | 61571382 | 1     | 1 | 1 | a  | g | 0.1712 | 0.173  | -0.103  | 0.0406 | 0.01128  | -- |
| DTA     | rs174555:61579760:T:C     | rs174555    | 61579760 | 1     | 1 | 1 | t  | c | 0.827  | 0.8288 | 0.103   | 0.0406 | 0.01128  | ++ |
| DTA     | rs174557:61581368:A:G     | rs174557    | 61581368 | 0.999 | 1 | 1 | a  | g | 0.827  | 0.8285 | 0.1027  | 0.0406 | 0.01134  | ++ |
| AA      | rs174595:61619893:C:T     | rs174595    | 61619893 | 0.996 | 1 | 1 | t  | c | 0.1167 | 0.1239 | -0.0739 | 0.0292 | 0.01136  | -- |
| STE     | rs693672:61658629:T:C     | rs693672    | 61658629 | 0.979 | 1 | 1 | t  | c | 0.2617 | 0.2653 | 0.0445  | 0.0176 | 0.01146  | ++ |
| STE     | rs174635:61647427:T:G     | rs174635    | 61647427 | 0.969 | 1 | 1 | t  | g | 0.355  | 0.3658 | 0.0402  | 0.0159 | 0.01159  | ++ |
| PLE     | rs174450:61641542:G:T     | rs174450    | 61641542 | 0.959 | 1 | 1 | t  | g | 0.5806 | 0.5931 | 0.0821  | 0.0326 | 0.01166  | ++ |
| STE     | rs2845572:61614595:G:A    | rs2845572   | 61614595 | 0.98  | 1 | 1 | a  | g | 0.0783 | 0.084  | -0.065  | 0.0258 | 0.01168  | -- |
| ARA     | rs2851682                 | rs2851682   | 61616012 | 0.983 | 1 | 1 | a  | g | 0.9162 | 0.9209 | 0.0822  | 0.0326 | 0.01171  | ++ |



|         |                           |             |          |       |   |   |    |     |        |        |         |        |         |    |
|---------|---------------------------|-------------|----------|-------|---|---|----|-----|--------|--------|---------|--------|---------|----|
| DTA     | 11:61606683-G-A           | rs174581    | 61606683 | 1     | 1 | 1 | a  | g   | 0.1866 | 0.1948 | -0.0983 | 0.039  | 0.01174 | -- |
| STE     | rs174634:61647387:G:C     | rs174634    | 61647387 | 0.97  | 1 | 1 | c  | g   | 0.6341 | 0.6449 | -0.0401 | 0.0159 | 0.01177 | -- |
| AA      | rs2727263:61618012:C:T    | rs2727263   | 61618012 | 0.975 | 1 | 1 | t  | c   | 0.086  | 0.0874 | -0.0784 | 0.0312 | 0.01203 | -- |
| DPA6    | 11:61600327-G-A           | rs174573    | 61600327 | 1     | 1 | 1 | a  | g   | 0.1115 | 0.12   | -0.1118 | 0.0447 | 0.01236 | -- |
| SQRAT63 | rs526126                  | rs526126    | 61624885 | 1     | 1 | 1 | c  | g   | 0.8841 | 0.895  | -0.1441 | 0.0577 | 0.01249 | -- |
| ALA     | 11:61629122-G-A           | rs174616    | 61629122 | 1     | 1 | 1 | a  | g   | 0.3808 | 0.387  | 0.1352  | 0.0543 | 0.01279 | ++ |
| DTA     | rs174576                  | rs174576    | 61603510 | 1     | 1 | 1 | a  | c   | 0.1866 | 0.1976 | -0.0968 | 0.0389 | 0.01284 | -- |
| PLA     | rs422249                  | rs422249    | 61639488 | 0.976 | 1 | 1 | t  | c   | 0.1873 | 0.1953 | 0.1184  | 0.0476 | 0.01289 | ++ |
| PUFA    | rs174582                  | rs174582    | 61607168 | 1     | 1 | 1 | a  | g   | 0.8891 | 0.9021 | -0.1312 | 0.0529 | 0.01313 | -- |
| DTA     | 11:61604782-A-T           | rs2524299   | 61604782 | 1     | 1 | 1 | a  | t   | 0.8992 | 0.9235 | 0.1267  | 0.0511 | 0.01321 | ++ |
| DTA     | rs28456:61589481:A:G      | rs28456     | 61589481 | 1     | 1 | 1 | a  | g   | 0.827  | 0.8278 | 0.1005  | 0.0406 | 0.01331 | ++ |
| DTA     | 11:61581764-T-C           | rs174560    | 61581764 | 1     | 1 | 1 | t  | c   | 0.827  | 0.8278 | 0.1005  | 0.0406 | 0.01331 | ++ |
| DTA     | rs174548                  | rs174548    | 61571348 | 1     | 1 | 1 | c  | g   | 0.827  | 0.8278 | 0.1005  | 0.0406 | 0.01331 | ++ |
| PAL     | 11:61629166-A-G           | rs174617    | 61629166 | 1     | 1 | 1 | a  | g   | 0.6101 | 0.6155 | 0.0305  | 0.0123 | 0.01331 | ++ |
| ALA     | rs174582                  | rs174582    | 61607168 | 1     | 1 | 1 | a  | g   | 0.8891 | 0.9021 | -0.2398 | 0.097  | 0.01338 | -- |
| STE     | rs2851682                 | rs2851682   | 61616012 | 0.983 | 1 | 1 | a  | g   | 0.9162 | 0.9209 | 0.0634  | 0.0256 | 0.01344 | ++ |
| STE     | 11:61620274-T-C           | rs72643559  | 61620274 | 1     | 1 | 1 | t  | c   | 0.9312 | 0.9413 | 0.0705  | 0.0286 | 0.01381 | ++ |
| ARA     | rs2526680:61611216:C:T    | rs2526680   | 61611216 | 0.969 | 1 | 1 | t  | c   | 0.0679 | 0.0804 | -0.0838 | 0.034  | 0.01384 | -- |
| STE     | rs174455                  | rs174455    | 61656117 | 1     | 1 | 1 | a  | g   | 0.5959 | 0.6002 | -0.0379 | 0.0154 | 0.01401 | -- |
| DTA     | rs2072114                 | rs2072114   | 61605215 | 1     | 1 | 1 | a  | g   | 0.8992 | 0.9235 | 0.1259  | 0.0513 | 0.01406 | ++ |
| DTA     | 11:61606642-A-G           | rs174580    | 61606642 | 1     | 1 | 1 | a  | g   | 0.8005 | 0.8108 | 0.0951  | 0.0387 | 0.0141  | ++ |
| ARA     | rs174464_61657926         | rs174464    | 61657926 | 0.987 | 1 | 1 | a  | g   | 0.3487 | 0.358  | 0.0497  | 0.0203 | 0.01412 | ++ |
| DTA     | 11:61593816-C-T           | rs174568    | 61593816 | 1     | 1 | 1 | t  | c   | 0.1826 | 0.1827 | -0.098  | 0.04   | 0.0142  | -- |
| ALA     | rs12577276:61632310:A:G   | rs12577276  | 61632310 | 0.968 | 1 | 1 | a  | g   | 0.857  | 0.8684 | -0.1908 | 0.0781 | 0.01461 | -- |
| LA      | rs174582                  | rs174582    | 61607168 | 1     | 1 | 1 | a  | g   | 0.8891 | 0.9021 | -0.1448 | 0.0594 | 0.01479 | -- |
| GLA     | rs174582                  | rs174582    | 61607168 | 1     | 1 | 1 | a  | g   | 0.8891 | 0.9021 | -0.2278 | 0.0936 | 0.01496 | -- |
| PUFA6   | rs174582                  | rs174582    | 61607168 | 1     | 1 | 1 | a  | g   | 0.8891 | 0.9021 | -0.1299 | 0.0534 | 0.01498 | -- |
| DTA     | rs3834458:61594920:CT:C   | rs774882452 | 61594920 | 0.996 | 1 | 1 | ct | c   | 0.8157 | 0.8165 | 0.0964  | 0.0399 | 0.01575 | ++ |
| PAL     | rs35622765:61629656:A:ACT | rs35622765  | 61629656 | 0.999 | 1 | 1 | a  | act | 0.6108 | 0.6165 | 0.0297  | 0.0123 | 0.0161  | ++ |

|         |                         |            |          |       |   |   |    |   |        |        |         |        |         |    |
|---------|-------------------------|------------|----------|-------|---|---|----|---|--------|--------|---------|--------|---------|----|
| DHA     | 11:61647288-G-A         | rs7942717  | 61647288 | 1     | 1 | 1 | a  | g | 0.9008 | 0.9077 | 0.1061  | 0.0442 | 0.01633 | ++ |
| SQRAT63 | rs422249                | rs422249   | 61639488 | 0.976 | 1 | 1 | t  | c | 0.1873 | 0.1953 | 0.1153  | 0.048  | 0.01633 | ++ |
| STE     | rs2526680:61611216:C:T  | rs2526680  | 61611216 | 0.969 | 1 | 1 | t  | c | 0.0679 | 0.0804 | -0.0637 | 0.0265 | 0.01635 | -- |
| EIC9    | rs11605884:61630133:T:C | rs11605884 | 61630133 | 0.968 | 1 | 1 | t  | c | 0.904  | 0.9089 | -0.1197 | 0.0499 | 0.01646 | -- |
| PLA     | 11:61657110-C-T         | rs174460   | 61657110 | 1     | 1 | 1 | t  | c | 0.6207 | 0.6262 | -0.0945 | 0.0394 | 0.01646 | -- |
| PLA     | rs174458:61656995:C:T   | rs174458   | 61656995 | 1     | 1 | 1 | t  | c | 0.6214 | 0.6259 | -0.0945 | 0.0394 | 0.01651 | -- |
| LA      | rs174533:61549025:G:A   | rs174533   | 61549025 | 0.986 | 1 | 1 | a  | g | 0.1988 | 0.2053 | 0.0948  | 0.0395 | 0.01654 | ++ |
| DGLA    | rs174575                | rs174575   | 61602003 | 1     | 1 | 1 | c  | g | 0.8792 | 0.8885 | -0.0974 | 0.0408 | 0.01701 | +- |
| LIG     | rs102275                | rs102275   | 61557803 | 1     | 1 | 1 | t  | c | 0.7974 | 0.803  | -0.0849 | 0.0356 | 0.01714 | -- |
| DTA     | rs5792235:61596322:CA:C | -          | 61596322 | 0.998 | 1 | 1 | ca | c | 0.8131 | 0.8156 | 0.0944  | 0.0396 | 0.01725 | ++ |
| DTA     | rs174550                | rs174550   | 61571478 | 1     | 1 | 1 | t  | c | 0.8154 | 0.8156 | 0.0947  | 0.0398 | 0.01735 | ++ |
| DTA     | rs174546                | rs174546   | 61569830 | 1     | 1 | 1 | t  | c | 0.1844 | 0.1846 | -0.0947 | 0.0398 | 0.01735 | -- |
| DTA     | 11:61569306-C-G         | rs174545   | 61569306 | 1     | 1 | 1 | c  | g | 0.8154 | 0.8156 | 0.0947  | 0.0398 | 0.01735 | ++ |
| DTA     | rs174547                | rs174547   | 61570783 | 1     | 1 | 1 | t  | c | 0.8154 | 0.8156 | 0.0947  | 0.0398 | 0.01735 | ++ |
| PAL     | 11:61629666-A-G         | rs174619   | 61629666 | 1     | 1 | 1 | a  | g | 0.3844 | 0.3893 | -0.0293 | 0.0123 | 0.01751 | -- |
| DTA     | rs174551:61573684:T:C   | rs174551   | 61573684 | 1     | 1 | 1 | t  | c | 0.8153 | 0.8156 | 0.0945  | 0.0398 | 0.0176  | ++ |
| DPA6    | rs174572                | rs174572   | 61598288 | 1     | 1 | 1 | t  | c | 0.1115 | 0.1208 | -0.1071 | 0.0451 | 0.01762 | -- |
| DHA     | rs422249                | rs422249   | 61639488 | 0.976 | 1 | 1 | t  | c | 0.1873 | 0.1953 | -0.0766 | 0.0323 | 0.01767 | -- |
| DTA     | rs174553:61575158:A:G   | rs174553   | 61575158 | 0.999 | 1 | 1 | a  | g | 0.8153 | 0.8156 | 0.0944  | 0.0398 | 0.01782 | ++ |
| ARA     | rs174466:61659296:A:G   | rs174466   | 61659296 | 0.966 | 1 | 1 | a  | g | 0.359  | 0.3611 | 0.0481  | 0.0204 | 0.01814 | ++ |
| DPA     | rs76095489:61664711:A:T | rs76095489 | 61664711 | 0.907 | 1 | 1 | a  | t | 0.9297 | 0.9365 | -0.1824 | 0.0775 | 0.01867 | -- |
| PAL     | rs174615:61628964:T:A   | rs174615   | 61628964 | 0.998 | 1 | 1 | a  | t | 0.3788 | 0.386  | -0.0292 | 0.0124 | 0.0187  | -- |
| PLE     | 11:61620274-T-C         | rs72643559 | 61620274 | 1     | 1 | 1 | t  | c | 0.9312 | 0.9413 | -0.1374 | 0.0585 | 0.01888 | -- |
| PAL     | rs174614:61628915:T:C   | rs174614   | 61628915 | 0.998 | 1 | 1 | t  | c | 0.6139 | 0.6213 | 0.0292  | 0.0124 | 0.01891 | ++ |
| PLA     | rs174465:61658800:C:T   | rs174465   | 61658800 | 0.98  | 1 | 1 | t  | c | 0.6222 | 0.628  | -0.0933 | 0.0398 | 0.01891 | -- |
| PUFA3   | rs3168072               | rs3168072  | 61631510 | 1     | 1 | 1 | a  | t | 0.9312 | 0.9364 | -0.1534 | 0.0654 | 0.01901 | -- |
| EDA     | 11:61621194-G-A         | rs174598   | 61621194 | 1     | 1 | 1 | a  | g | 0.2131 | 0.2167 | 0.0775  | 0.0332 | 0.01951 | ++ |
| DTA     | rs99780                 | rs99780    | 61596633 | 1     | 1 | 1 | t  | c | 0.1848 | 0.1885 | -0.092  | 0.0394 | 0.01959 | -- |
| DTA     | rs1535                  | rs1535     | 61597972 | 1     | 1 | 1 | a  | g | 0.811  | 0.8156 | 0.0924  | 0.0396 | 0.01971 | ++ |

|         |                           |            |          |       |   |   |    |     |        |        |         |        |         |    |
|---------|---------------------------|------------|----------|-------|---|---|----|-----|--------|--------|---------|--------|---------|----|
| SQRAT63 | rs174635:61647427:T:G     | rs174635   | 61647427 | 0.969 | 1 | 1 | t  | g   | 0.355  | 0.3658 | 0.0901  | 0.0387 | 0.01982 | ++ |
| SQRAT63 | rs174634:61647387:G:C     | rs174634   | 61647387 | 0.97  | 1 | 1 | c  | g   | 0.6341 | 0.6449 | -0.0899 | 0.0386 | 0.02    | -- |
| ELA     | rs174448                  | rs174448   | 61639573 | 1     | 1 | 1 | a  | g   | 0.6442 | 0.6511 | -0.1123 | 0.0483 | 0.02007 | -- |
| DGLA    | rs174572                  | rs174572   | 61598288 | 1     | 1 | 1 | t  | c   | 0.1115 | 0.1208 | 0.096   | 0.0414 | 0.02033 | -+ |
| EDA     | rs57668028:61591995:GAA:G | -          | 61591995 | 0.982 | 1 | 1 | g  | gaa | 0.163  | 0.1686 | 0.0848  | 0.0367 | 0.02068 | ++ |
| PAL     | rs174613:61628492:G:A     | rs174613   | 61628492 | 0.997 | 1 | 1 | a  | g   | 0.3785 | 0.3872 | -0.0287 | 0.0124 | 0.02077 | -- |
| ARA     | rs1000778                 | rs1000778  | 61655305 | 1     | 1 | 1 | a  | g   | 0.3391 | 0.3483 | 0.0484  | 0.021  | 0.02109 | ++ |
| DTA     | rs35473591:61586328:C:CT  | rs35473591 | 61586328 | 1     | 1 | 1 | ct | c   | 0.1844 | 0.1854 | -0.0919 | 0.0399 | 0.02122 | -- |
| PLE     | rs76095489:61664711:A:T   | rs76095489 | 61664711 | 0.907 | 1 | 1 | a  | t   | 0.9297 | 0.9365 | -0.132  | 0.0574 | 0.0214  | -- |
| DTA     | 11:61585144-A-G           | rs174562   | 61585144 | 1     | 1 | 1 | a  | g   | 0.8145 | 0.8156 | 0.0917  | 0.0399 | 0.02149 | ++ |
| LIG     | 11:61557826-T-C           | rs102274   | 61557826 | 1     | 1 | 1 | t  | c   | 0.7982 | 0.8035 | -0.0824 | 0.0358 | 0.02151 | -- |
| LIG     | rs174535                  | rs174535   | 61551356 | 1     | 1 | 1 | t  | c   | 0.7936 | 0.803  | -0.0816 | 0.0355 | 0.02159 | -- |
| PLE     | rs57535397:61641889:G:A   | rs57535397 | 61641889 | 0.911 | 1 | 1 | a  | g   | 0.0607 | 0.0716 | 0.136   | 0.0592 | 0.02173 | ++ |
| LA      | rs57668028:61591995:GAA:G | -          | 61591995 | 0.982 | 1 | 1 | g  | gaa | 0.163  | 0.1686 | 0.0987  | 0.0431 | 0.02211 | ++ |
| EDA     | 11:61622227-T-C           | rs174600   | 61622227 | 0.996 | 1 | 1 | t  | c   | 0.7814 | 0.7847 | -0.0757 | 0.0331 | 0.02223 | -- |
| DPA6    | 11:61624181-T-C           | rs97384    | 61624181 | 1     | 1 | 1 | t  | c   | 0.2561 | 0.2744 | -0.0729 | 0.0319 | 0.02234 | -- |
| SQRAT63 | rs74771917:61627960:C:T   | rs74771917 | 61627960 | 0.99  | 1 | 1 | t  | c   | 0.097  | 0.0999 | -0.1477 | 0.0647 | 0.02242 | -- |
| ALA     | rs174613:61628492:G:A     | rs174613   | 61628492 | 0.997 | 1 | 1 | a  | g   | 0.3785 | 0.3872 | 0.125   | 0.0548 | 0.02252 | ++ |
| ARA     | rs174463:61657838:G:A     | rs174463   | 61657838 | 0.988 | 1 | 1 | a  | g   | 0.6465 | 0.6513 | -0.0459 | 0.0201 | 0.02254 | -- |
| ALA     | 11:61627811-T-C           | rs174609   | 61627811 | 1     | 1 | 1 | t  | c   | 0.6119 | 0.6219 | -0.125  | 0.0548 | 0.02263 | -- |
| DHA     | 11:61672645-G-C           | rs174475   | 61672645 | 1     | 1 | 1 | c  | g   | 0.1967 | 0.2125 | -0.0715 | 0.0313 | 0.02263 | +- |
| ALA     | rs174614:61628915:T:C     | rs174614   | 61628915 | 0.998 | 1 | 1 | t  | c   | 0.6139 | 0.6213 | -0.1247 | 0.0547 | 0.02266 | -- |
| ALA     | rs174615:61628964:T:A     | rs174615   | 61628964 | 0.998 | 1 | 1 | a  | t   | 0.3788 | 0.386  | 0.1247  | 0.0547 | 0.02268 | ++ |
| DTA     | rs174574                  | rs174574   | 61600342 | 1     | 1 | 1 | a  | c   | 0.1844 | 0.1874 | -0.0901 | 0.0395 | 0.02268 | -- |
| DTA     | rs174567:61593005:A:G     | rs174567   | 61593005 | 0.998 | 1 | 1 | a  | g   | 0.8151 | 0.8152 | 0.0905  | 0.0397 | 0.02275 | ++ |
| ALA     | 11:61629166-A-G           | rs174617   | 61629166 | 1     | 1 | 1 | a  | g   | 0.6101 | 0.6155 | -0.1241 | 0.0545 | 0.02277 | -- |
| EDA     | rs174533:61549025:G:A     | rs174533   | 61549025 | 0.986 | 1 | 1 | a  | g   | 0.1988 | 0.2053 | 0.0788  | 0.0347 | 0.02314 | ++ |
| EIC9    | 11:61647288-G-A           | rs7942717  | 61647288 | 1     | 1 | 1 | a  | g   | 0.9008 | 0.9077 | 0.1033  | 0.0455 | 0.0232  | ++ |
| DGLA    | 11:61600327-G-A           | rs174573   | 61600327 | 1     | 1 | 1 | a  | g   | 0.1115 | 0.12   | 0.094   | 0.0415 | 0.0234  | -+ |

|       |                           |            |          |       |   |   |    |     |        |        |         |        |         |    |
|-------|---------------------------|------------|----------|-------|---|---|----|-----|--------|--------|---------|--------|---------|----|
| STE   | rs11353704:61648227:AT:A  | -          | 61648227 | 0.941 | 1 | 1 | a  | at  | 0.6375 | 0.6466 | -0.0363 | 0.016  | 0.02355 | -- |
| LA    | 11:61548559-A-G           | rs509360   | 61548559 | 1     | 1 | 1 | a  | g   | 0.7226 | 0.736  | -0.0837 | 0.037  | 0.02369 | -- |
| MUFA  | 11:61629166-A-G           | rs174617   | 61629166 | 1     | 1 | 1 | a  | g   | 0.6101 | 0.6155 | 0.0272  | 0.012  | 0.0237  | ++ |
| LIG   | rs174533:61549025:G:A     | rs174533   | 61549025 | 0.986 | 1 | 1 | a  | g   | 0.1988 | 0.2053 | 0.0793  | 0.0351 | 0.02383 | ++ |
| PAL   | rs174612:61628266:C:G     | rs174612   | 61628266 | 0.997 | 1 | 1 | c  | g   | 0.6079 | 0.6132 | 0.0278  | 0.0123 | 0.02398 | ++ |
| LA    | rs174537                  | rs174537   | 61552680 | 1     | 1 | 1 | t  | g   | 0.194  | 0.2002 | 0.0912  | 0.0405 | 0.02428 | ++ |
| ARA   | rs174461:61657401:A:C     | rs174461   | 61657401 | 0.993 | 1 | 1 | a  | c   | 0.3485 | 0.3535 | 0.0453  | 0.0201 | 0.02446 | ++ |
| DPA6  | rs174595:61619893:C:T     | rs174595   | 61619893 | 0.996 | 1 | 1 | t  | c   | 0.1167 | 0.1239 | -0.0973 | 0.0433 | 0.02458 | -- |
| DPA6  | rs174589:61615803:C:G     | rs174589   | 61615803 | 0.973 | 1 | 1 | c  | g   | 0.8774 | 0.8859 | 0.1     | 0.0445 | 0.02466 | ++ |
| AA    | rs2526678:61623793:G:A    | rs2526678  | 61623793 | 0.95  | 1 | 1 | a  | g   | 0.0868 | 0.0871 | -0.0705 | 0.0314 | 0.02467 | -- |
| ALA   | rs35622765:61629656:A:ACT | rs35622765 | 61629656 | 0.999 | 1 | 1 | a  | act | 0.6108 | 0.6165 | -0.1229 | 0.0547 | 0.02471 | -- |
| ALA   | 11:61629666-A-G           | rs174619   | 61629666 | 1     | 1 | 1 | a  | g   | 0.3844 | 0.3893 | 0.1227  | 0.0547 | 0.0248  | ++ |
| OLE   | 11:61629166-A-G           | rs174617   | 61629166 | 1     | 1 | 1 | a  | g   | 0.6101 | 0.6155 | 0.0274  | 0.0122 | 0.02497 | ++ |
| PAL   | 11:61627811-T-C           | rs174609   | 61627811 | 1     | 1 | 1 | t  | c   | 0.6119 | 0.6219 | 0.0278  | 0.0124 | 0.025   | ++ |
| DTA   | rs174564:61588305:A:G     | rs174564   | 61588305 | 1     | 1 | 1 | a  | g   | 0.8146 | 0.8152 | 0.0891  | 0.0398 | 0.02509 | ++ |
| MUFA  | rs11407273:61627411:C:CT  | rs11407273 | 61627411 | 0.988 | 1 | 1 | ct | c   | 0.6062 | 0.6108 | 0.0269  | 0.012  | 0.02509 | ++ |
| DHA   | rs28456:61589481:A:G      | rs28456    | 61589481 | 1     | 1 | 1 | a  | g   | 0.827  | 0.8278 | 0.0708  | 0.0316 | 0.02516 | ++ |
| DHA   | 11:61581764-T-C           | rs174560   | 61581764 | 1     | 1 | 1 | t  | c   | 0.827  | 0.8278 | 0.0708  | 0.0316 | 0.02516 | ++ |
| DHA   | rs174548                  | rs174548   | 61571348 | 1     | 1 | 1 | c  | g   | 0.827  | 0.8278 | 0.0708  | 0.0316 | 0.02516 | ++ |
| EPA   | rs74771917:61627960:C:T   | rs74771917 | 61627960 | 0.99  | 1 | 1 | t  | c   | 0.097  | 0.0999 | 0.1862  | 0.0833 | 0.02541 | ++ |
| OLE   | rs11407273:61627411:C:CT  | rs11407273 | 61627411 | 0.988 | 1 | 1 | ct | c   | 0.6062 | 0.6108 | 0.0273  | 0.0122 | 0.02543 | ++ |
| PUFA6 | rs174533:61549025:G:A     | rs174533   | 61549025 | 0.986 | 1 | 1 | a  | g   | 0.1988 | 0.2053 | 0.0797  | 0.0357 | 0.02566 | ++ |
| LA    | 11:61621194-G-A           | rs174598   | 61621194 | 1     | 1 | 1 | a  | g   | 0.2131 | 0.2167 | 0.0843  | 0.0378 | 0.0257  | ++ |
| ARA   | JHU_11.61657592           | rs68112215 | 61657593 | 1     | 1 | 1 | t  | c   | 0.6485 | 0.6546 | -0.045  | 0.0202 | 0.02572 | -- |
| PLA   | rs174455                  | rs174455   | 61656117 | 1     | 1 | 1 | a  | g   | 0.5959 | 0.6002 | -0.0869 | 0.039  | 0.02591 | -- |
| ARA   | rs36047269:61656254:T:TC  | rs36047269 | 61656254 | 0.997 | 1 | 1 | t  | tc  | 0.3466 | 0.3528 | 0.0449  | 0.0202 | 0.02613 | ++ |
| ARA   | rs174456:61656182:C:A     | rs174456   | 61656182 | 0.997 | 1 | 1 | a  | c   | 0.6472 | 0.6535 | -0.0449 | 0.0202 | 0.02613 | -- |
| ARA   | rs5792240:61656541:A:AT   | rs5792240  | 61656541 | 0.998 | 1 | 1 | a  | at  | 0.3467 | 0.3528 | 0.0448  | 0.0202 | 0.02623 | ++ |
| ARA   | rs1295988:61656658:A:C    | rs1295988  | 61656658 | 0.998 | 1 | 1 | a  | c   | 0.3467 | 0.3528 | 0.0448  | 0.0202 | 0.02625 | ++ |

|         |                          |            |          |       |   |   |   |    |        |        |         |        |         |    |
|---------|--------------------------|------------|----------|-------|---|---|---|----|--------|--------|---------|--------|---------|----|
| CAP     | rs1151139:61671156:C:T   | rs1151139  | 61671156 | 0.986 | 1 | 1 | t | c  | 0.2938 | 0.3011 | -0.1211 | 0.0545 | 0.02634 | -- |
| ARA     | rs174457:61656975:T:C    | rs174457   | 61656975 | 0.998 | 1 | 1 | t | c  | 0.3469 | 0.3528 | 0.0448  | 0.0202 | 0.02636 | ++ |
| LA      | 11:61622227-T-C          | rs174600   | 61622227 | 0.996 | 1 | 1 | t | c  | 0.7814 | 0.7847 | -0.0835 | 0.0376 | 0.0265  | -- |
| MUFA    | 11:61627833-A-G          | rs174610   | 61627833 | 1     | 1 | 1 | a | g  | 0.6067 | 0.6137 | 0.0265  | 0.012  | 0.02691 | ++ |
| PAL     | 11:61627833-A-G          | rs174610   | 61627833 | 1     | 1 | 1 | a | g  | 0.6067 | 0.6137 | 0.0272  | 0.0123 | 0.02712 | ++ |
| MUFA    | rs174612:61628266:C:G    | rs174612   | 61628266 | 0.997 | 1 | 1 | c | g  | 0.6079 | 0.6132 | 0.0264  | 0.012  | 0.02747 | ++ |
| ARA     | rs174459:61657050:C:T    | rs174459   | 61657050 | 0.998 | 1 | 1 | t | c  | 0.6472 | 0.6527 | -0.0444 | 0.0202 | 0.02758 | -- |
| MUFA    | 11:61629122-G-A          | rs174616   | 61629122 | 1     | 1 | 1 | a | g  | 0.3808 | 0.387  | -0.0265 | 0.012  | 0.02768 | -- |
| EDA     | rs174565:61591636:C:G    | rs174565   | 61591636 | 0.997 | 1 | 1 | c | g  | 0.8668 | 0.8706 | -0.0837 | 0.038  | 0.02775 | -- |
| OLE     | 11:61629122-G-A          | rs174616   | 61629122 | 1     | 1 | 1 | a | g  | 0.3808 | 0.387  | -0.0269 | 0.0122 | 0.02777 | -- |
| MUFA    | 11:61627811-T-C          | rs174609   | 61627811 | 1     | 1 | 1 | t | c  | 0.6119 | 0.6219 | 0.0264  | 0.012  | 0.02828 | ++ |
| PUFA3   | rs174582                 | rs174582   | 61607168 | 1     | 1 | 1 | a | g  | 0.8891 | 0.9021 | -0.1293 | 0.059  | 0.02833 | -- |
| ARA     | rs2727265:61609004:C:A   | rs2727265  | 61609004 | 0.989 | 1 | 1 | a | c  | 0.0635 | 0.0764 | -0.0748 | 0.0341 | 0.02843 | -- |
| DPA6    | rs174597:61621040:G:C    | rs174597   | 61621040 | 0.986 | 1 | 1 | c | g  | 0.1246 | 0.128  | -0.0932 | 0.0427 | 0.02897 | -- |
| OLE     | 11:61627833-A-G          | rs174610   | 61627833 | 1     | 1 | 1 | a | g  | 0.6067 | 0.6137 | 0.0266  | 0.0122 | 0.02903 | ++ |
| GLA     | rs2235093:61665122:A:G   | rs2235093  | 61665122 | 0.975 | 1 | 1 | a | g  | 0.2414 | 0.2581 | 0.1238  | 0.0568 | 0.02933 | ++ |
| SQRAT63 | rs174450:61641542:G:T    | rs174450   | 61641542 | 0.959 | 1 | 1 | t | g  | 0.5806 | 0.5931 | -0.0834 | 0.0383 | 0.02943 | -- |
| MUFA    | rs174613:61628492:G:A    | rs174613   | 61628492 | 0.997 | 1 | 1 | a | g  | 0.3785 | 0.3872 | -0.0262 | 0.012  | 0.02949 | -- |
| SQRAT63 | rs174456:61656182:C:A    | rs174456   | 61656182 | 0.997 | 1 | 1 | a | c  | 0.6472 | 0.6535 | -0.0826 | 0.038  | 0.02954 | -- |
| SQRAT63 | rs36047269:61656254:T:TC | rs36047269 | 61656254 | 0.997 | 1 | 1 | t | tc | 0.3466 | 0.3528 | 0.0826  | 0.038  | 0.0297  | ++ |
| ARA     | rs1151144:61656585:T:C   | rs1151144  | 61656585 | 0.998 | 1 | 1 | t | c  | 0.3474 | 0.3528 | 0.0439  | 0.0202 | 0.02971 | ++ |
| OLE     | rs174612:61628266:C:G    | rs174612   | 61628266 | 0.997 | 1 | 1 | c | g  | 0.6079 | 0.6132 | 0.0265  | 0.0122 | 0.02974 | ++ |
| PLE     | rs72643557:61579427:C:T  | rs72643557 | 61579427 | 0.936 | 1 | 1 | t | c  | 0.0607 | 0.0734 | 0.1264  | 0.0582 | 0.02989 | ++ |
| MUFA    | rs174606:61626973:G:T    | rs174606   | 61626973 | 0.977 | 1 | 1 | t | g  | 0.3876 | 0.3941 | -0.0264 | 0.0121 | 0.02991 | -- |
| OLE     | 11:61627811-T-C          | rs174609   | 61627811 | 1     | 1 | 1 | t | c  | 0.6119 | 0.6219 | 0.0266  | 0.0123 | 0.02994 | ++ |
| ALA     | rs174589:61615803:C:G    | rs174589   | 61615803 | 0.973 | 1 | 1 | c | g  | 0.8774 | 0.8859 | -0.1885 | 0.0869 | 0.03    | -- |
| PUFA3   | rs174597:61621040:G:C    | rs174597   | 61621040 | 0.986 | 1 | 1 | c | g  | 0.1246 | 0.128  | 0.1113  | 0.0513 | 0.03012 | ++ |
| MUFA    | rs174614:61628915:T:C    | rs174614   | 61628915 | 0.998 | 1 | 1 | t | c  | 0.6139 | 0.6213 | 0.0261  | 0.012  | 0.03022 | ++ |
| EDA     | rs174570                 | rs174570   | 61597212 | 1     | 1 | 1 | t | c  | 0.1279 | 0.1324 | 0.083   | 0.0383 | 0.03025 | ++ |

|         |                          |            |          |       |   |   |    |    |        |        |         |        |         |    |
|---------|--------------------------|------------|----------|-------|---|---|----|----|--------|--------|---------|--------|---------|----|
| MUFA    | rs174615:61628964:T:A    | rs174615   | 61628964 | 0.998 | 1 | 1 | a  | t  | 0.3788 | 0.386  | -0.0261 | 0.012  | 0.0303  | -- |
| PUFA    | rs174533:61549025:G:A    | rs174533   | 61549025 | 0.986 | 1 | 1 | a  | g  | 0.1988 | 0.2053 | 0.0768  | 0.0355 | 0.03035 | ++ |
| SQRAT63 | rs5792240:61656541:A:AT  | rs5792240  | 61656541 | 0.998 | 1 | 1 | a  | at | 0.3467 | 0.3528 | 0.0822  | 0.038  | 0.03039 | ++ |
| PUFA3   | rs12577276:61632310:A:G  | rs12577276 | 61632310 | 0.968 | 1 | 1 | a  | g  | 0.857  | 0.8684 | -0.1101 | 0.0508 | 0.03041 | -- |
| CAP     | rs11407273:61627411:C:CT | rs11407273 | 61627411 | 0.988 | 1 | 1 | ct | c  | 0.6062 | 0.6108 | -0.1082 | 0.05   | 0.03054 | -- |
| PUFA3   | rs528285                 | rs528285   | 61660704 | 0.955 | 1 | 1 | a  | g  | 0.3479 | 0.3508 | 0.0724  | 0.0335 | 0.03061 | ++ |
| SQRAT63 | rs1295988:61656658:A:C   | rs1295988  | 61656658 | 0.998 | 1 | 1 | a  | c  | 0.3467 | 0.3528 | 0.082   | 0.038  | 0.03067 | ++ |
| CAP     | 11:61629166-A-G          | rs174617   | 61629166 | 1     | 1 | 1 | a  | g  | 0.6101 | 0.6155 | -0.1083 | 0.0502 | 0.03093 | -- |
| DPA6    | rs174590:61616977:G:C    | rs174590   | 61616977 | 0.981 | 1 | 1 | c  | g  | 0.1133 | 0.122  | -0.0945 | 0.0438 | 0.031   | -- |
| PLA     | rs174635:61647427:T:G    | rs174635   | 61647427 | 0.969 | 1 | 1 | t  | g  | 0.355  | 0.3658 | 0.0889  | 0.0413 | 0.03112 | ++ |
| PLA     | rs174634:61647387:G:C    | rs174634   | 61647387 | 0.97  | 1 | 1 | c  | g  | 0.6341 | 0.6449 | -0.0888 | 0.0412 | 0.03132 | -- |
| MUFA    | 11:61629666-A-G          | rs174619   | 61629666 | 1     | 1 | 1 | a  | g  | 0.3844 | 0.3893 | -0.026  | 0.0121 | 0.03139 | -- |
| SQRAT63 | rs174457:61656975:T:C    | rs174457   | 61656975 | 0.998 | 1 | 1 | t  | c  | 0.3469 | 0.3528 | 0.0816  | 0.0379 | 0.03143 | ++ |
| OLE     | rs174613:61628492:G:A    | rs174613   | 61628492 | 0.997 | 1 | 1 | a  | g  | 0.3785 | 0.3872 | -0.0264 | 0.0123 | 0.03148 | -- |
| SQRAT63 | rs174459:61657050:C:T    | rs174459   | 61657050 | 0.998 | 1 | 1 | t  | c  | 0.6472 | 0.6527 | -0.0816 | 0.038  | 0.03151 | -- |
| TFA     | 11:61548559-A-G          | rs509360   | 61548559 | 1     | 1 | 1 | a  | g  | 0.7226 | 0.736  | -0.0823 | 0.0383 | 0.03168 | -- |
| LIG     | rs174536                 | rs174536   | 61551927 | 1     | 1 | 1 | a  | c  | 0.7916 | 0.7994 | -0.0756 | 0.0352 | 0.03169 | -- |
| EPA     | rs57535397:61641889:G:A  | rs57535397 | 61641889 | 0.911 | 1 | 1 | a  | g  | 0.0607 | 0.0716 | 0.2223  | 0.1036 | 0.03197 | ++ |
| OLE     | rs174606:61626973:G:T    | rs174606   | 61626973 | 0.977 | 1 | 1 | t  | g  | 0.3876 | 0.3941 | -0.0265 | 0.0124 | 0.03198 | -- |
| GLA     | rs174472:61671956:A:G    | rs174472   | 61671956 | 0.975 | 1 | 1 | a  | g  | 0.2874 | 0.2929 | 0.119   | 0.0555 | 0.03218 | ++ |
| PAL     | rs174606:61626973:G:T    | rs174606   | 61626973 | 0.977 | 1 | 1 | t  | g  | 0.3876 | 0.3941 | -0.0266 | 0.0124 | 0.03221 | -- |
| OLE     | rs174614:61628915:T:C    | rs174614   | 61628915 | 0.998 | 1 | 1 | t  | c  | 0.6139 | 0.6213 | 0.0262  | 0.0123 | 0.03239 | ++ |
| DHA     | 11:61582708-T-C          | rs174561   | 61582708 | 1     | 1 | 1 | t  | c  | 0.827  | 0.8288 | 0.0675  | 0.0316 | 0.0324  | ++ |
| DHA     | rs174549                 | rs174549   | 61571382 | 1     | 1 | 1 | a  | g  | 0.1712 | 0.173  | -0.0675 | 0.0316 | 0.03243 | -- |
| DHA     | rs174555:61579760:T:C    | rs174555   | 61579760 | 1     | 1 | 1 | t  | c  | 0.827  | 0.8288 | 0.0675  | 0.0316 | 0.03243 | ++ |
| DHA     | rs174557:61581368:A:G    | rs174557   | 61581368 | 0.999 | 1 | 1 | a  | g  | 0.827  | 0.8285 | 0.0674  | 0.0315 | 0.03244 | ++ |
| OLE     | rs174615:61628964:T:A    | rs174615   | 61628964 | 0.998 | 1 | 1 | a  | t  | 0.3788 | 0.386  | -0.0262 | 0.0123 | 0.0325  | -- |
| OLE     | 11:61629666-A-G          | rs174619   | 61629666 | 1     | 1 | 1 | a  | g  | 0.3844 | 0.3893 | -0.0263 | 0.0123 | 0.03255 | -- |
| LAU     | 11:61629166-A-G          | rs174617   | 61629166 | 1     | 1 | 1 | a  | g  | 0.6101 | 0.6155 | -0.0814 | 0.0381 | 0.0326  | -- |

|         |                           |            |          |       |   |   |   |     |        |        |         |        |         |    |
|---------|---------------------------|------------|----------|-------|---|---|---|-----|--------|--------|---------|--------|---------|----|
| STE     | rs72643557:61579427:C:T   | rs72643557 | 61579427 | 0.936 | 1 | 1 | t | c   | 0.0607 | 0.0734 | -0.0616 | 0.0289 | 0.03279 | -- |
| EPA     | rs72643557:61579427:C:T   | rs72643557 | 61579427 | 0.936 | 1 | 1 | t | c   | 0.0607 | 0.0734 | 0.2057  | 0.0965 | 0.03305 | ++ |
| PUFA3   | rs174589:61615803:C:G     | rs174589   | 61615803 | 0.973 | 1 | 1 | c | g   | 0.8774 | 0.8859 | -0.1128 | 0.053  | 0.03324 | -- |
| EDA     | rs174535                  | rs174535   | 61551356 | 1     | 1 | 1 | t | c   | 0.7936 | 0.803  | -0.0741 | 0.0349 | 0.0334  | -- |
| CAP     | rs174612:61628266:C:G     | rs174612   | 61628266 | 0.997 | 1 | 1 | c | g   | 0.6079 | 0.6132 | -0.1064 | 0.0501 | 0.03348 | -- |
| MUFA    | rs35622765:61629656:A:ACT | rs35622765 | 61629656 | 0.999 | 1 | 1 | a | act | 0.6108 | 0.6165 | 0.0257  | 0.0121 | 0.03383 | ++ |
| ARA     | rs174589:61615803:C:G     | rs174589   | 61615803 | 0.973 | 1 | 1 | c | g   | 0.8774 | 0.8859 | -0.0664 | 0.0313 | 0.03397 | -- |
| DGLA    | rs2727270:61603237:C:T    | rs2727270  | 61603237 | 0.998 | 1 | 1 | t | c   | 0.0765 | 0.1012 | -0.0822 | 0.0388 | 0.03404 | -- |
| SQRAT63 | rs1151144:61656585:T:C    | rs1151144  | 61656585 | 0.998 | 1 | 1 | t | c   | 0.3474 | 0.3528 | 0.0805  | 0.038  | 0.03405 | ++ |
| PUFA6   | rs57668028:61591995:GAA:G | -          | 61591995 | 0.982 | 1 | 1 | g | gaa | 0.163  | 0.1686 | 0.0823  | 0.0388 | 0.03406 | ++ |
| ELA     | rs174458:61656995:C:T     | rs174458   | 61656995 | 1     | 1 | 1 | t | c   | 0.6214 | 0.6259 | -0.1015 | 0.0479 | 0.03415 | -- |
| PLA     | rs76656467                | rs76656467 | 61649030 | 1     | 1 | 1 | c | g   | 0.0599 | 0.0693 | 0.1632  | 0.0771 | 0.03423 | -+ |
| EDA     | rs108499:61547237:C:T     | rs108499   | 61547237 | 0.985 | 1 | 1 | t | c   | 0.1734 | 0.1744 | 0.0772  | 0.0365 | 0.03433 | ++ |
| PUFA3   | rs57535397:61641889:G:A   | rs57535397 | 61641889 | 0.911 | 1 | 1 | a | g   | 0.0607 | 0.0716 | 0.1414  | 0.0668 | 0.03435 | ++ |
| SQRAT63 | rs174466:61659296:A:G     | rs174466   | 61659296 | 0.966 | 1 | 1 | a | g   | 0.359  | 0.3611 | 0.0816  | 0.0386 | 0.03445 | ++ |
| DGLA    | 11:61603358-A-T           | rs2727271  | 61603358 | 1     | 1 | 1 | a | t   | 0.8983 | 0.9235 | 0.082   | 0.0388 | 0.03459 | ++ |
| LAU     | rs2727265:61609004:C:A    | rs2727265  | 61609004 | 0.989 | 1 | 1 | a | c   | 0.0635 | 0.0764 | 0.1287  | 0.0609 | 0.03468 | ++ |
| STE     | rs174449                  | rs174449   | 61640379 | 1     | 1 | 1 | a | g   | 0.5785 | 0.5921 | -0.0319 | 0.0151 | 0.03473 | -- |
| CAP     | rs174615:61628964:T:A     | rs174615   | 61628964 | 0.998 | 1 | 1 | a | t   | 0.3788 | 0.386  | 0.1063  | 0.0504 | 0.03489 | ++ |
| DPA     | 11:61621194-G-A           | rs174598   | 61621194 | 1     | 1 | 1 | a | g   | 0.2131 | 0.2167 | 0.0879  | 0.0417 | 0.03494 | ++ |
| ELA     | 11:61657110-C-T           | rs174460   | 61657110 | 1     | 1 | 1 | t | c   | 0.6207 | 0.6262 | -0.101  | 0.0479 | 0.03494 | -- |
| SQRAT63 | rs528285                  | rs528285   | 61660704 | 0.955 | 1 | 1 | a | g   | 0.3479 | 0.3508 | -0.0768 | 0.0364 | 0.03498 | -- |
| CAP     | rs174614:61628915:T:C     | rs174614   | 61628915 | 0.998 | 1 | 1 | t | c   | 0.6139 | 0.6213 | -0.1062 | 0.0504 | 0.03512 | -- |
| OLE     | 11:61579463-A-G           | rs174554   | 61579463 | 1     | 1 | 1 | a | g   | 0.8156 | 0.8156 | 0.0388  | 0.0184 | 0.03514 | ?+ |
| EPA     | rs174472:61671956:A:G     | rs174472   | 61671956 | 0.975 | 1 | 1 | a | g   | 0.2874 | 0.2929 | -0.1066 | 0.0506 | 0.03528 | -- |
| SQRAT63 | rs174463:61657838:G:A     | rs174463   | 61657838 | 0.988 | 1 | 1 | a | g   | 0.6465 | 0.6513 | -0.08   | 0.0381 | 0.03551 | -- |
| SQRAT63 | rs11353704:61648227:AT:A  | -          | 61648227 | 0.941 | 1 | 1 | a | at  | 0.6375 | 0.6466 | -0.0828 | 0.0394 | 0.03554 | -- |
| ELA     | rs174465:61658800:C:T     | rs174465   | 61658800 | 0.98  | 1 | 1 | t | c   | 0.6222 | 0.628  | -0.1017 | 0.0484 | 0.03558 | -- |
| EIC9    | rs174594:61619829:C:A     | rs174594   | 61619829 | 0.997 | 1 | 1 | a | c   | 0.7473 | 0.7596 | 0.0622  | 0.0296 | 0.0356  | ++ |

|         |                           |             |          |       |   |   |    |     |        |        |         |        |         |    |
|---------|---------------------------|-------------|----------|-------|---|---|----|-----|--------|--------|---------|--------|---------|----|
| LA      | 11:61549458-A-G           | rs174534    | 61549458 | 1     | 1 | 1 | a  | g   | 0.813  | 0.8152 | -0.0859 | 0.0409 | 0.03569 | -- |
| DGLA    | rs149597144:61602460:CA:C | rs199985711 | 61602460 | 0.978 | 1 | 1 | ca | c   | 0.8802 | 0.8863 | -0.0853 | 0.0406 | 0.0357  | +- |
| OLE     | rs35622765:61629656:A:ACT | rs35622765  | 61629656 | 0.999 | 1 | 1 | a  | act | 0.6108 | 0.6165 | 0.0258  | 0.0123 | 0.03584 | ++ |
| ARA     | rs174465:61658800:C:T     | rs174465    | 61658800 | 0.98  | 1 | 1 | t  | c   | 0.6222 | 0.628  | -0.0419 | 0.02   | 0.03587 | -- |
| LA      | 11:61557826-T-C           | rs102274    | 61557826 | 1     | 1 | 1 | t  | c   | 0.7982 | 0.8035 | -0.0848 | 0.0404 | 0.0359  | -- |
| PAL     | rs174620:61629747:A:G     | rs174620    | 61629747 | 0.996 | 1 | 1 | a  | g   | 0.7131 | 0.7207 | 0.0279  | 0.0133 | 0.0359  | ++ |
| LAU     | rs11407273:61627411:C:CT  | rs11407273  | 61627411 | 0.988 | 1 | 1 | ct | c   | 0.6062 | 0.6108 | -0.0793 | 0.0378 | 0.03603 | -- |
| CAP     | 11:61627833-A-G           | rs174610    | 61627833 | 1     | 1 | 1 | a  | g   | 0.6067 | 0.6137 | -0.1046 | 0.05   | 0.03635 | -- |
| ELA     | rs174449                  | rs174449    | 61640379 | 1     | 1 | 1 | a  | g   | 0.5785 | 0.5921 | -0.0975 | 0.0466 | 0.03654 | -- |
| ALA     | rs174597:61621040:G:C     | rs174597    | 61621040 | 0.986 | 1 | 1 | c  | g   | 0.1246 | 0.128  | 0.1753  | 0.084  | 0.03688 | +- |
| CAP     | rs174613:61628492:G:A     | rs174613    | 61628492 | 0.997 | 1 | 1 | a  | g   | 0.3785 | 0.3872 | 0.1049  | 0.0503 | 0.03722 | ++ |
| EIC9    | 11:61618608-A-G           | rs174592    | 61618608 | 1     | 1 | 1 | a  | g   | 0.7478 | 0.7589 | 0.0617  | 0.0296 | 0.03722 | ++ |
| DPA     | 11:61622227-T-C           | rs174600    | 61622227 | 0.996 | 1 | 1 | t  | c   | 0.7814 | 0.7847 | -0.0865 | 0.0415 | 0.03733 | -- |
| CAP     | rs174606:61626973:G:T     | rs174606    | 61626973 | 0.977 | 1 | 1 | t  | g   | 0.3876 | 0.3941 | 0.1049  | 0.0504 | 0.03745 | ++ |
| SQRAT63 | rs174461:61657401:A:C     | rs174461    | 61657401 | 0.993 | 1 | 1 | a  | c   | 0.3485 | 0.3535 | 0.0791  | 0.0381 | 0.03752 | ++ |
| ARA     | rs2524296:61601378:C:T    | rs2524296   | 61601378 | 0.997 | 1 | 1 | t  | c   | 0.0634 | 0.0773 | -0.0704 | 0.0339 | 0.03768 | -- |
| DHA     | rs2727270:61603237:C:T    | rs2727270   | 61603237 | 0.998 | 1 | 1 | t  | c   | 0.0765 | 0.1012 | -0.0833 | 0.0401 | 0.0378  | -- |
| PUFA    | 11:61621194-G-A           | rs174598    | 61621194 | 1     | 1 | 1 | a  | g   | 0.2131 | 0.2167 | 0.0701  | 0.0337 | 0.03784 | ++ |
| SQRAT63 | rs174454:61650747:G:A     | rs174454    | 61650747 | 0.963 | 1 | 1 | a  | g   | 0.6633 | 0.6834 | -0.0832 | 0.0401 | 0.03784 | -- |
| PUFA6   | 11:61548559-A-G           | rs509360    | 61548559 | 1     | 1 | 1 | a  | g   | 0.7226 | 0.736  | -0.069  | 0.0333 | 0.03789 | -- |
| ARA     | rs693672:61658629:T:C     | rs693672    | 61658629 | 0.979 | 1 | 1 | t  | c   | 0.2617 | 0.2653 | 0.0459  | 0.0221 | 0.03798 | ++ |
| DHA     | rs174544:61567753:C:A     | rs174544    | 61567753 | 0.997 | 1 | 1 | a  | c   | 0.1712 | 0.1719 | -0.0659 | 0.0318 | 0.03804 | -- |
| BEH     | 11:61621194-G-A           | rs174598    | 61621194 | 1     | 1 | 1 | a  | g   | 0.2131 | 0.2167 | 0.0561  | 0.027  | 0.03806 | ++ |
| DHA     | 11:61603358-A-T           | rs2727271   | 61603358 | 1     | 1 | 1 | a  | t   | 0.8983 | 0.9235 | 0.0832  | 0.0401 | 0.03808 | ++ |
| BEH     | 11:61620274-T-C           | rs72643559  | 61620274 | 1     | 1 | 1 | t  | c   | 0.9312 | 0.9413 | 0.1102  | 0.0531 | 0.03811 | ++ |
| PUFA6   | 11:61621194-G-A           | rs174598    | 61621194 | 1     | 1 | 1 | a  | g   | 0.2131 | 0.2167 | 0.0707  | 0.0341 | 0.03821 | ++ |
| DTA     | rs4564341:61573540:C:T    | rs4564341   | 61573540 | 0.935 | 1 | 1 | t  | c   | 0.0606 | 0.0673 | -0.13   | 0.0627 | 0.03825 | -- |
| PLA     | rs11353704:61648227:AT:A  | -           | 61648227 | 0.941 | 1 | 1 | a  | at  | 0.6375 | 0.6466 | -0.087  | 0.042  | 0.03837 | -- |
| CAP     | 11:61629666-A-G           | rs174619    | 61629666 | 1     | 1 | 1 | a  | g   | 0.3844 | 0.3893 | 0.1042  | 0.0504 | 0.03845 | ++ |



|         |                             |             |          |       |   |   |          |     |        |        |         |        |         |    |
|---------|-----------------------------|-------------|----------|-------|---|---|----------|-----|--------|--------|---------|--------|---------|----|
| CAP     | rs35622765:61629656:A:ACT   | rs35622765  | 61629656 | 0.999 | 1 | 1 | a        | act | 0.6108 | 0.6165 | -0.1042 | 0.0504 | 0.03868 | -- |
| ARA     | rs2845574:61601872:C:T      | rs2845574   | 61601872 | 0.997 | 1 | 1 | t        | c   | 0.0634 | 0.0774 | -0.0699 | 0.0338 | 0.03887 | -- |
| DGLA    | rs174611                    | rs174611    | 61627881 | 0.972 | 1 | 1 | t        | c   | 0.8956 | 0.9069 | -0.0819 | 0.0397 | 0.03892 | -- |
| DHA     | 11:61604782-A-T             | rs2524299   | 61604782 | 1     | 1 | 1 | a        | t   | 0.8992 | 0.9235 | 0.0831  | 0.0403 | 0.03894 | ++ |
| ARA     | rs2845573:61601908:A:G      | rs2845573   | 61601908 | 0.997 | 1 | 1 | a        | g   | 0.9226 | 0.9366 | 0.0698  | 0.0338 | 0.03897 | ++ |
| PUFA6   | rs174537                    | rs174537    | 61552680 | 1     | 1 | 1 | t        | g   | 0.194  | 0.2002 | 0.0754  | 0.0365 | 0.03907 | ++ |
| ALA     | rs174590:61616977:G:C       | rs174590    | 61616977 | 0.981 | 1 | 1 | c        | g   | 0.1133 | 0.122  | 0.1785  | 0.0865 | 0.03914 | ++ |
| PAL     | rs174618                    | rs174618    | 61629322 | 1     | 1 | 1 | t        | c   | 0.714  | 0.72   | 0.0272  | 0.0132 | 0.0392  | ++ |
| EDA     | rs102275                    | rs102275    | 61557803 | 1     | 1 | 1 | t        | c   | 0.7974 | 0.803  | -0.072  | 0.0349 | 0.03928 | -- |
| PUFA    | 11:61622227-T-C             | rs174600    | 61622227 | 0.996 | 1 | 1 | t        | c   | 0.7814 | 0.7847 | -0.0691 | 0.0336 | 0.03966 | -- |
| DHA     | 11:61580635-C-T             | rs174556    | 61580635 | 1     | 1 | 1 | t        | c   | 0.1697 | 0.1711 | -0.0656 | 0.0319 | 0.03967 | -- |
| LAU     | rs174612:61628266:C:G       | rs174612    | 61628266 | 0.997 | 1 | 1 | c        | g   | 0.6079 | 0.6132 | -0.0779 | 0.0379 | 0.03973 | -- |
| DGLA    | rs174605:61626921:G:T       | rs174605    | 61626921 | 0.96  | 1 | 1 | t        | g   | 0.091  | 0.1025 | 0.083   | 0.0405 | 0.04011 | ++ |
| MYR     | rs2845573:61601908:A:G      | rs2845573   | 61601908 | 0.997 | 1 | 1 | a        | g   | 0.9226 | 0.9366 | -0.1261 | 0.0615 | 0.04021 | -- |
| PUFA6   | 11:61622227-T-C             | rs174600    | 61622227 | 0.996 | 1 | 1 | t        | c   | 0.7814 | 0.7847 | -0.0697 | 0.034  | 0.04023 | -- |
| BEH     | 11:61622227-T-C             | rs174600    | 61622227 | 0.996 | 1 | 1 | t        | c   | 0.7814 | 0.7847 | -0.0553 | 0.027  | 0.04025 | -- |
| LA      | rs108499:61547237:C:T       | rs108499    | 61547237 | 0.985 | 1 | 1 | t        | c   | 0.1734 | 0.1744 | 0.088   | 0.0429 | 0.04027 | ++ |
| MYR     | rs2845574:61601872:C:T      | rs2845574   | 61601872 | 0.997 | 1 | 1 | t        | c   | 0.0634 | 0.0774 | 0.1261  | 0.0615 | 0.0403  | ++ |
| LAU     | 11:61629666-A-G             | rs174619    | 61629666 | 1     | 1 | 1 | a        | g   | 0.3844 | 0.3893 | 0.0784  | 0.0382 | 0.04043 | ++ |
| ALA     | rs174612:61628266:C:G       | rs174612    | 61628266 | 0.997 | 1 | 1 | c        | g   | 0.6079 | 0.6132 | -0.1119 | 0.0546 | 0.04047 | -- |
| SQRAT63 | JHU_11.61657592             | rs68112215  | 61657593 | 1     | 1 | 1 | t        | c   | 0.6485 | 0.6546 | -0.0778 | 0.038  | 0.04071 | -- |
| LAU     | rs2845573:61601908:A:G      | rs2845573   | 61601908 | 0.997 | 1 | 1 | a        | g   | 0.9226 | 0.9366 | -0.1233 | 0.0603 | 0.04075 | -- |
| ALA     | 11:61627833-A-G             | rs174610    | 61627833 | 1     | 1 | 1 | a        | g   | 0.6067 | 0.6137 | -0.1115 | 0.0545 | 0.04084 | -- |
| ARA     | rs138766446:61602458:CCCA:C | rs765564188 | 61602458 | 0.992 | 1 | 1 | cc<br>ca | c   | 0.9218 | 0.9365 | 0.069   | 0.0338 | 0.04085 | ++ |
| LAU     | rs2845574:61601872:C:T      | rs2845574   | 61601872 | 0.997 | 1 | 1 | t        | c   | 0.0634 | 0.0774 | 0.1232  | 0.0603 | 0.04089 | ++ |
| PUFA3   | rs174590:61616977:G:C       | rs174590    | 61616977 | 0.981 | 1 | 1 | c        | g   | 0.1133 | 0.122  | 0.1076  | 0.0527 | 0.04105 | ++ |
| PUFA    | rs57668028:61591995:GAA:G   | -           | 61591995 | 0.982 | 1 | 1 | g        | gaa | 0.163  | 0.1686 | 0.0784  | 0.0384 | 0.04108 | ++ |
| SQRAT63 | rs174464_61657926           | rs174464    | 61657926 | 0.987 | 1 | 1 | a        | g   | 0.3487 | 0.358  | 0.0782  | 0.0383 | 0.04113 | ++ |

|      |                             |             |          |       |   |   |          |     |        |        |         |        |         |    |
|------|-----------------------------|-------------|----------|-------|---|---|----------|-----|--------|--------|---------|--------|---------|----|
| DGLA | rs174608:61627484:A:G       | rs174608    | 61627484 | 0.968 | 1 | 1 | a        | g   | 0.8957 | 0.9068 | -0.0813 | 0.0399 | 0.04127 | -- |
| CAP  | 11:61629122-G-A             | rs174616    | 61629122 | 1     | 1 | 1 | a        | g   | 0.3808 | 0.387  | 0.1021  | 0.0501 | 0.04129 | ++ |
| MYR  | rs2524296:61601378:C:T      | rs2524296   | 61601378 | 0.997 | 1 | 1 | t        | c   | 0.0634 | 0.0773 | 0.1255  | 0.0615 | 0.04142 | ++ |
| LA   | rs174538                    | rs174538    | 61560081 | 0.998 | 1 | 1 | a        | g   | 0.1683 | 0.1741 | 0.087   | 0.0427 | 0.04145 | ++ |
| ALA  | 11:61622227-T-C             | rs174600    | 61622227 | 0.996 | 1 | 1 | t        | c   | 0.7814 | 0.7847 | -0.1269 | 0.0623 | 0.04156 | -- |
| OLE  | rs528285                    | rs528285    | 61660704 | 0.955 | 1 | 1 | a        | g   | 0.3479 | 0.3508 | -0.0244 | 0.012  | 0.04161 | -- |
| CAP  | 11:61627811-T-C             | rs174609    | 61627811 | 1     | 1 | 1 | t        | c   | 0.6119 | 0.6219 | -0.1024 | 0.0503 | 0.04168 | -- |
| EDA  | rs174538                    | rs174538    | 61560081 | 0.998 | 1 | 1 | a        | g   | 0.1683 | 0.1741 | 0.0736  | 0.0362 | 0.04182 | ++ |
| EDA  | 11:61557826-T-C             | rs102274    | 61557826 | 1     | 1 | 1 | t        | c   | 0.7982 | 0.8035 | -0.0713 | 0.0351 | 0.04187 | -- |
| STE  | rs6591668:61661113:T:C      | rs6591668   | 61661113 | 0.976 | 1 | 1 | t        | c   | 0.0547 | 0.0589 | 0.0657  | 0.0324 | 0.0422  | ++ |
| ARA  | 11:61604967-C-T             | rs2072113   | 61604967 | 1     | 1 | 1 | t        | c   | 0.0757 | 0.1017 | -0.0632 | 0.0312 | 0.0426  | -- |
| LAU  | rs2524296:61601378:C:T      | rs2524296   | 61601378 | 0.997 | 1 | 1 | t        | c   | 0.0634 | 0.0773 | 0.1222  | 0.0603 | 0.04266 | ++ |
| MYR  | rs2727265:61609004:C:A      | rs2727265   | 61609004 | 0.989 | 1 | 1 | a        | c   | 0.0635 | 0.0764 | 0.1265  | 0.0625 | 0.04284 | ++ |
| LAU  | rs138766446:61602458:CCCA:C | rs765564188 | 61602458 | 0.992 | 1 | 1 | cc<br>ca | c   | 0.9218 | 0.9365 | -0.1217 | 0.0601 | 0.04296 | -- |
| AA   | rs174597:61621040:G:C       | rs174597    | 61621040 | 0.986 | 1 | 1 | c        | g   | 0.1246 | 0.128  | -0.0578 | 0.0285 | 0.04298 | -- |
| TFA  | rs13966                     | rs13966     | 61664992 | 1     | 1 | 1 | t        | c   | 0.2541 | 0.2783 | 0.075   | 0.0371 | 0.04308 | ++ |
| PUFA | 11:61548559-A-G             | rs509360    | 61548559 | 1     | 1 | 1 | a        | g   | 0.7226 | 0.736  | -0.0669 | 0.0331 | 0.04315 | -- |
| CAP  | rs174470:61669608:G:A       | rs174470    | 61669608 | 0.993 | 1 | 1 | a        | g   | 0.2961 | 0.3038 | -0.1095 | 0.0542 | 0.04319 | -- |
| LAU  | rs174606:61626973:G:T       | rs174606    | 61626973 | 0.977 | 1 | 1 | t        | g   | 0.3876 | 0.3941 | 0.0776  | 0.0384 | 0.04322 | ++ |
| ARA  | rs174590:61616977:G:C       | rs174590    | 61616977 | 0.981 | 1 | 1 | c        | g   | 0.1133 | 0.122  | 0.0637  | 0.0315 | 0.04343 | ++ |
| NER  | rs11605884:61630133:T:C     | rs11605884  | 61630133 | 0.968 | 1 | 1 | t        | c   | 0.904  | 0.9089 | -0.1676 | 0.083  | 0.04346 | -- |
| ALA  | 11:61621194-G-A             | rs174598    | 61621194 | 1     | 1 | 1 | a        | g   | 0.2131 | 0.2167 | 0.1259  | 0.0625 | 0.04378 | ++ |
| DTA  | rs174559:61581656:G:A       | rs174559    | 61581656 | 0.999 | 1 | 1 | a        | g   | 0.1566 | 0.1611 | -0.084  | 0.0417 | 0.0438  | -- |
| LAU  | rs35622765:61629656:A:ACT   | rs35622765  | 61629656 | 0.999 | 1 | 1 | a        | act | 0.6108 | 0.6165 | -0.0771 | 0.0383 | 0.0438  | -- |
| AA   | rs174602                    | rs174602    | 61624414 | 1     | 1 | 1 | t        | c   | 0.7776 | 0.7822 | 0.043   | 0.0213 | 0.04384 | ++ |
| MYR  | rs138766446:61602458:CCCA:C | rs765564188 | 61602458 | 0.992 | 1 | 1 | cc<br>ca | c   | 0.9218 | 0.9365 | -0.1237 | 0.0614 | 0.04397 | -- |
| EDA  | rs174537                    | rs174537    | 61552680 | 1     | 1 | 1 | t        | g   | 0.194  | 0.2002 | 0.0699  | 0.0347 | 0.04416 | ++ |
| LLA  | 11:61548559-A-G             | rs509360    | 61548559 | 1     | 1 | 1 | a        | g   | 0.7226 | 0.736  | -0.0874 | 0.0434 | 0.04428 | -- |

|         |                          |             |          |       |   |   |    |   |        |        |         |        |         |    |
|---------|--------------------------|-------------|----------|-------|---|---|----|---|--------|--------|---------|--------|---------|----|
| DGLA    | rs526126                 | rs526126    | 61624885 | 1     | 1 | 1 | c  | g | 0.8841 | 0.895  | -0.0774 | 0.0385 | 0.04438 | -- |
| LAU     | 11:61627833-A-G          | rs174610    | 61627833 | 1     | 1 | 1 | a  | g | 0.6067 | 0.6137 | -0.076  | 0.0378 | 0.04446 | -- |
| EDA     | rs174559:61581656:G:A    | rs174559    | 61581656 | 0.999 | 1 | 1 | a  | g | 0.1566 | 0.1611 | 0.075   | 0.0373 | 0.04452 | ++ |
| STE     | rs7113281:61662780:G:A   | rs7113281   | 61662780 | 0.984 | 1 | 1 | a  | g | 0.94   | 0.945  | -0.0642 | 0.032  | 0.04455 | -- |
| LA      | rs102275                 | rs102275    | 61557803 | 1     | 1 | 1 | t  | c | 0.7974 | 0.803  | -0.0808 | 0.0402 | 0.04465 | -- |
| DGLA    | 11:61604967-C-T          | rs2072113   | 61604967 | 1     | 1 | 1 | t  | c | 0.0757 | 0.1017 | -0.0778 | 0.0387 | 0.04474 | -- |
| DPA     | 11:61672645-G-C          | rs174475    | 61672645 | 1     | 1 | 1 | c  | g | 0.1967 | 0.2125 | -0.0912 | 0.0455 | 0.04489 | +- |
| DPA6    | 11:61579463-A-G          | rs174554    | 61579463 | 1     | 1 | 1 | a  | g | 0.8156 | 0.8156 | 0.1095  | 0.0546 | 0.04503 | ?+ |
| PAL     | rs11407273:61627411:C:CT | rs11407273  | 61627411 | 0.988 | 1 | 1 | ct | c | 0.6062 | 0.6108 | 0.0249  | 0.0124 | 0.04515 | ++ |
| PLE     | rs174465:61658800:C:T    | rs174465    | 61658800 | 0.98  | 1 | 1 | t  | c | 0.6222 | 0.628  | 0.0639  | 0.0319 | 0.04517 | ++ |
| LIG     | rs174537                 | rs174537    | 61552680 | 1     | 1 | 1 | t  | g | 0.194  | 0.2002 | 0.0707  | 0.0353 | 0.04534 | ++ |
| BEH     | rs174589:61615803:C:G    | rs174589    | 61615803 | 0.973 | 1 | 1 | c  | g | 0.8774 | 0.8859 | -0.0685 | 0.0342 | 0.04547 | -- |
| PLE     | rs174626                 | rs174626    | 61637057 | 0.982 | 1 | 1 | a  | g | 0.5323 | 0.5363 | 0.0597  | 0.0299 | 0.04583 | ++ |
| PUFA    | rs174537                 | rs174537    | 61552680 | 1     | 1 | 1 | t  | g | 0.194  | 0.2002 | 0.0722  | 0.0362 | 0.04588 | ++ |
| EPA     | rs3168072                | rs3168072   | 61631510 | 1     | 1 | 1 | a  | t | 0.9312 | 0.9364 | -0.1936 | 0.0971 | 0.04614 | -- |
| DTA     | rs7394579:61581450:A:G   | rs7394579   | 61581450 | 0.984 | 1 | 1 | a  | g | 0.8415 | 0.8467 | 0.0842  | 0.0422 | 0.04616 | ++ |
| ARA     | rs174458:61656995:C:T    | rs174458    | 61656995 | 1     | 1 | 1 | t  | c | 0.6214 | 0.6259 | -0.0395 | 0.0198 | 0.04621 | -- |
| STE     | rs2727265:61609004:C:A   | rs2727265   | 61609004 | 0.989 | 1 | 1 | a  | c | 0.0635 | 0.0764 | -0.0529 | 0.0265 | 0.04624 | -- |
| PLA     | rs116672159:61648113:C:T | rs116672159 | 61648113 | 0.968 | 1 | 1 | t  | c | 0.0635 | 0.0721 | 0.1523  | 0.0764 | 0.04626 | -+ |
| DTA     | rs174583                 | rs174583    | 61609750 | 1     | 1 | 1 | t  | c | 0.2006 | 0.2089 | -0.0751 | 0.0377 | 0.04654 | -- |
| BEH     | rs174618                 | rs174618    | 61629322 | 1     | 1 | 1 | t  | c | 0.714  | 0.72   | -0.0498 | 0.025  | 0.04658 | -- |
| DHA     | rs174574                 | rs174574    | 61600342 | 1     | 1 | 1 | a  | c | 0.1844 | 0.1874 | -0.0613 | 0.0308 | 0.04663 | -- |
| STE     | rs57535397:61641889:G:A  | rs57535397  | 61641889 | 0.911 | 1 | 1 | a  | g | 0.0607 | 0.0716 | -0.0582 | 0.0293 | 0.04667 | -- |
| DTA     | rs174570                 | rs174570    | 61597212 | 1     | 1 | 1 | t  | c | 0.1279 | 0.1324 | -0.0913 | 0.0459 | 0.0467  | -+ |
| DPA6    | rs93923:61613745:C:T     | rs93923     | 61613745 | 0.961 | 1 | 1 | t  | c | 0.0971 | 0.1119 | -0.0935 | 0.047  | 0.04681 | -- |
| ARA     | rs2072114                | rs2072114   | 61605215 | 1     | 1 | 1 | a  | g | 0.8992 | 0.9235 | 0.0619  | 0.0311 | 0.04696 | ++ |
| EIC9    | rs174601                 | rs174601    | 61623140 | 1     | 1 | 1 | t  | c | 0.2455 | 0.265  | -0.0581 | 0.0293 | 0.04702 | -- |
| LA      | rs174535                 | rs174535    | 61551356 | 1     | 1 | 1 | t  | c | 0.7936 | 0.803  | -0.0796 | 0.0401 | 0.04718 | -- |
| SQRAT63 | rs3168072                | rs3168072   | 61631510 | 1     | 1 | 1 | a  | t | 0.9312 | 0.9364 | 0.1546  | 0.0779 | 0.0472  | ++ |

|       |                                    |           |          |       |   |   |   |             |        |        |         |        |         |     |
|-------|------------------------------------|-----------|----------|-------|---|---|---|-------------|--------|--------|---------|--------|---------|-----|
| LA    | rs174536                           | rs174536  | 61551927 | 1     | 1 | 1 | a | c           | 0.7916 | 0.7994 | -0.0788 | 0.0397 | 0.04733 | --  |
| EDA   | 11:61548559-A-G                    | rs509360  | 61548559 | 1     | 1 | 1 | a | g           | 0.7226 | 0.736  | -0.0624 | 0.0315 | 0.04734 | --  |
| EIC9  | 11:61621556-G-C                    | rs174599  | 61621556 | 0.998 | 1 | 1 | c | g           | 0.2431 | 0.2595 | -0.0583 | 0.0295 | 0.04783 | --  |
| DGLA  | rs2072114                          | rs2072114 | 61605215 | 1     | 1 | 1 | a | g           | 0.8992 | 0.9235 | 0.0766  | 0.0387 | 0.04786 | ++  |
| PUFA3 | 11:61622227-T-C                    | rs174600  | 61622227 | 0.996 | 1 | 1 | t | c           | 0.7814 | 0.7847 | -0.0764 | 0.0386 | 0.04807 | --  |
| ARA   | rs4564341:61573540:C:T             | rs4564341 | 61573540 | 0.935 | 1 | 1 | t | c           | 0.0606 | 0.0673 | -0.0765 | 0.0387 | 0.04809 | --  |
| PUFA3 | 11:61621194-G-A                    | rs174598  | 61621194 | 1     | 1 | 1 | a | g           | 0.2131 | 0.2167 | 0.0764  | 0.0388 | 0.04892 | ++  |
| DHA   | rs174465:61658800:C:T              | rs174465  | 61658800 | 0.98  | 1 | 1 | t | c           | 0.6222 | 0.628  | 0.0517  | 0.0263 | 0.04924 | ++  |
| PLA   | rs6591668:61661113:T:C             | rs6591668 | 61661113 | 0.976 | 1 | 1 | t | c           | 0.0547 | 0.0589 | 0.169   | 0.086  | 0.04934 | ++  |
| EDA   | 11:61549458-A-G                    | rs174534  | 61549458 | 1     | 1 | 1 | a | g           | 0.813  | 0.8152 | -0.0696 | 0.0354 | 0.04957 | --  |
| PLA   | rs7113281:61662780:G:A             | rs7113281 | 61662780 | 0.984 | 1 | 1 | a | g           | 0.94   | 0.945  | -0.1672 | 0.0851 | 0.04957 | --  |
| ALA   | rs174579                           | rs174579  | 61605613 | 0.998 | 1 | 1 | t | c           | 0.0912 | 0.1069 | 0.1901  | 0.0969 | 0.04981 | ++  |
| PLA   | rs174463:61657838:G:A              | rs174463  | 61657838 | 0.988 | 1 | 1 | a | g           | 0.6465 | 0.6513 | -0.0789 | 0.0403 | 0.04997 | --  |
| PUFA  | rs174579                           | rs174579  | 61605613 | 0.998 | 1 | 1 | t | c           | 0.0912 | 0.1069 | 0.1036  | 0.0529 | 0.05005 | ++  |
| GLA   | rs13966                            | rs13966   | 61664992 | 1     | 1 | 1 | t | c           | 0.2541 | 0.2783 | 0.1095  | 0.0559 | 0.05024 | ++  |
| PAL   | rs2235093:61665122:A:G             | rs2235093 | 61665122 | 0.975 | 1 | 1 | a | g           | 0.2414 | 0.2581 | -0.0264 | 0.0135 | 0.05077 | --  |
| BEH   | rs174623:61635294:G:A              | rs174623  | 61635294 | 0.964 | 1 | 1 | a | g           | 0.5268 | 0.5298 | -0.0443 | 0.0227 | 0.05078 | --  |
| BEH   | rs174620:61629747:A:G              | rs174620  | 61629747 | 0.996 | 1 | 1 | a | g           | 0.7131 | 0.7207 | -0.0491 | 0.0251 | 0.05084 | --  |
| PLA   | rs174461:61657401:A:C              | rs174461  | 61657401 | 0.993 | 1 | 1 | a | c           | 0.3485 | 0.3535 | 0.0784  | 0.0402 | 0.05112 | ++  |
| EIC9  | 11:61622227-T-C                    | rs174600  | 61622227 | 0.996 | 1 | 1 | t | c           | 0.7814 | 0.7847 | 0.0615  | 0.0315 | 0.05113 | ++  |
| STE   | rs2072114                          | rs2072114 | 61605215 | 1     | 1 | 1 | a | g           | 0.8992 | 0.9235 | 0.0498  | 0.0255 | 0.05117 | ++  |
| PLE   | rs174455                           | rs174455  | 61656117 | 1     | 1 | 1 | a | g           | 0.5959 | 0.6002 | 0.0616  | 0.0316 | 0.05131 | ++  |
| EIC9  | rs143352979:61620628:AAACA<br>AC:A | -         | 61620628 | 0.934 | 1 | 1 | a | aaac<br>aac | 0.2703 | 0.2915 | -0.0568 | 0.0292 | 0.0514  | --  |
| MUFA  | rs528285                           | rs528285  | 61660704 | 0.955 | 1 | 1 | a | g           | 0.3479 | 0.3508 | -0.0231 | 0.0119 | 0.0516  | --  |
| OLE   | rs174537                           | rs174537  | 61552680 | 1     | 1 | 1 | t | g           | 0.194  | 0.2002 | -0.0278 | 0.0143 | 0.05166 | --  |
| MUFA  | rs174537                           | rs174537  | 61552680 | 1     | 1 | 1 | t | g           | 0.194  | 0.2002 | -0.0277 | 0.0142 | 0.05168 | --  |
| STE   | 11:61604967-C-T                    | rs2072113 | 61604967 | 1     | 1 | 1 | t | c           | 0.0757 | 0.1017 | -0.0496 | 0.0255 | 0.05199 | --  |
| EPA   | 11:61672645-G-C                    | rs174475  | 61672645 | 1     | 1 | 1 | c | g           | 0.1967 | 0.2125 | -0.1101 | 0.0567 | 0.05226 | +/- |

|       |                                    |             |          |       |   |   |   |             |        |        |         |        |         |    |
|-------|------------------------------------|-------------|----------|-------|---|---|---|-------------|--------|--------|---------|--------|---------|----|
| DTA   | rs174537                           | rs174537    | 61552680 | 1     | 1 | 1 | t | g           | 0.194  | 0.2002 | -0.0766 | 0.0395 | 0.05232 | -+ |
| PLE   | rs174458:61656995:C:T              | rs174458    | 61656995 | 1     | 1 | 1 | t | c           | 0.6214 | 0.6259 | 0.0615  | 0.0317 | 0.05233 | ++ |
| PLA   | rs174459:61657050:C:T              | rs174459    | 61657050 | 0.998 | 1 | 1 | t | c           | 0.6472 | 0.6527 | -0.0778 | 0.0401 | 0.05246 | -- |
| ARA   | 11:61620274-T-C                    | rs72643559  | 61620274 | 1     | 1 | 1 | t | c           | 0.9312 | 0.9413 | 0.0759  | 0.0392 | 0.05285 | +- |
| ARA   | 11:61657110-C-T                    | rs174460    | 61657110 | 1     | 1 | 1 | t | c           | 0.6207 | 0.6262 | -0.0384 | 0.0198 | 0.0529  | -- |
| DGLA  | rs174472:61671956:A:G              | rs174472    | 61671956 | 0.975 | 1 | 1 | a | g           | 0.2874 | 0.2929 | 0.0531  | 0.0275 | 0.05327 | ++ |
| PLA   | rs1151144:61656585:T:C             | rs1151144   | 61656585 | 0.998 | 1 | 1 | t | c           | 0.3474 | 0.3528 | 0.0775  | 0.0401 | 0.05338 | ++ |
| PLA   | rs174457:61656975:T:C              | rs174457    | 61656975 | 0.998 | 1 | 1 | t | c           | 0.3469 | 0.3528 | 0.0774  | 0.0401 | 0.0535  | ++ |
| ARA   | 11:61603358-A-T                    | rs2727271   | 61603358 | 1     | 1 | 1 | a | t           | 0.8983 | 0.9235 | 0.0599  | 0.0311 | 0.05353 | ++ |
| PLA   | rs1295988:61656658:A:C             | rs1295988   | 61656658 | 0.998 | 1 | 1 | a | c           | 0.3467 | 0.3528 | 0.0775  | 0.0401 | 0.05353 | ++ |
| PLA   | rs36047269:61656254:T:TC           | rs36047269  | 61656254 | 0.997 | 1 | 1 | t | tc          | 0.3466 | 0.3528 | 0.0775  | 0.0402 | 0.05356 | ++ |
| PLA   | rs5792240:61656541:A:AT            | rs5792240   | 61656541 | 0.998 | 1 | 1 | a | at          | 0.3467 | 0.3528 | 0.0775  | 0.0401 | 0.05356 | ++ |
| DGLA  | rs116672159:61648113:C:T           | rs116672159 | 61648113 | 0.968 | 1 | 1 | t | c           | 0.0635 | 0.0721 | -0.1036 | 0.0537 | 0.05358 | -- |
| LAU   | 11:61604967-C-T                    | rs2072113   | 61604967 | 1     | 1 | 1 | t | c           | 0.0757 | 0.1017 | 0.1064  | 0.0551 | 0.05358 | ++ |
| PLA   | rs174456:61656182:C:A              | rs174456    | 61656182 | 0.997 | 1 | 1 | a | c           | 0.6472 | 0.6535 | -0.0775 | 0.0402 | 0.05359 | -- |
| LA    | rs174579                           | rs174579    | 61605613 | 0.998 | 1 | 1 | t | c           | 0.0912 | 0.1069 | 0.115   | 0.0596 | 0.05366 | ++ |
| DPA   | rs528285                           | rs528285    | 61660704 | 0.955 | 1 | 1 | a | g           | 0.3479 | 0.3508 | 0.0715  | 0.0371 | 0.05372 | ++ |
| ARA   | rs2727270:61603237:C:T             | rs2727270   | 61603237 | 0.998 | 1 | 1 | t | c           | 0.0765 | 0.1012 | -0.0599 | 0.0311 | 0.05377 | -- |
| DHA   | 11:61604967-C-T                    | rs2072113   | 61604967 | 1     | 1 | 1 | t | c           | 0.0757 | 0.1017 | -0.077  | 0.04   | 0.05427 | -- |
| PUFA6 | 11:61557826-T-C                    | rs102274    | 61557826 | 1     | 1 | 1 | t | c           | 0.7982 | 0.8035 | -0.0703 | 0.0365 | 0.05441 | -- |
| ALA   | 11:61548559-A-G                    | rs509360    | 61548559 | 1     | 1 | 1 | a | g           | 0.7226 | 0.736  | -0.1213 | 0.0631 | 0.05452 | -- |
| OLE   | rs143352979:61620628:AAACA<br>AC:A | -           | 61620628 | 0.934 | 1 | 1 | a | aaac<br>aac | 0.2703 | 0.2915 | -0.025  | 0.013  | 0.05453 | -- |
| ARA   | rs174597:61621040:G:C              | rs174597    | 61621040 | 0.986 | 1 | 1 | c | g           | 0.1246 | 0.128  | 0.0585  | 0.0304 | 0.05458 | ++ |
| PLA   | JHU_11.61657592                    | rs68112215  | 61657593 | 1     | 1 | 1 | t | c           | 0.6485 | 0.6546 | -0.077  | 0.0401 | 0.05464 | -- |
| GLA   | rs174468                           | rs174468    | 61663691 | 1     | 1 | 1 | a | g           | 0.1639 | 0.187  | 0.1232  | 0.0642 | 0.05482 | ++ |
| EPA   | rs528285                           | rs528285    | 61660704 | 0.955 | 1 | 1 | a | g           | 0.3479 | 0.3508 | 0.0925  | 0.0481 | 0.05483 | -+ |
| BEH   | rs174582                           | rs174582    | 61607168 | 1     | 1 | 1 | a | g           | 0.8891 | 0.9021 | -0.0692 | 0.0361 | 0.05501 | -- |
| DHA   | rs174564:61588305:A:G              | rs174564    | 61588305 | 1     | 1 | 1 | a | g           | 0.8146 | 0.8152 | 0.0594  | 0.0309 | 0.05506 | ++ |

|       |                           |             |          |       |   |   |   |     |        |        |         |        |         |    |
|-------|---------------------------|-------------|----------|-------|---|---|---|-----|--------|--------|---------|--------|---------|----|
| PUFA6 | 11:61549458-A-G           | rs174534    | 61549458 | 1     | 1 | 1 | a | g   | 0.813  | 0.8152 | -0.0708 | 0.0369 | 0.0552  | -- |
| DHA   | rs174625:61636013:A:T     | rs174625    | 61636013 | 0.98  | 1 | 1 | a | t   | 0.2476 | 0.2629 | -0.0543 | 0.0283 | 0.05541 | -- |
| PLE   | rs174623:61635294:G:A     | rs174623    | 61635294 | 0.964 | 1 | 1 | a | g   | 0.5268 | 0.5298 | 0.0578  | 0.0302 | 0.05551 | ++ |
| PUFA6 | rs174579                  | rs174579    | 61605613 | 0.998 | 1 | 1 | t | c   | 0.0912 | 0.1069 | 0.1024  | 0.0535 | 0.05554 | ++ |
| DHA   | rs174455                  | rs174455    | 61656117 | 1     | 1 | 1 | a | g   | 0.5959 | 0.6002 | 0.0499  | 0.0261 | 0.05562 | ++ |
| LA    | rs174559:61581656:G:A     | rs174559    | 61581656 | 0.999 | 1 | 1 | a | g   | 0.1566 | 0.1611 | 0.0827  | 0.0432 | 0.05573 | ++ |
| LIG   | rs57668028:61591995:GAA:G | -           | 61591995 | 0.982 | 1 | 1 | g | gaa | 0.163  | 0.1686 | 0.0714  | 0.0373 | 0.05579 | ++ |
| PLA   | rs1000778                 | rs1000778   | 61655305 | 1     | 1 | 1 | a | g   | 0.3391 | 0.3483 | 0.0777  | 0.0407 | 0.0559  | ++ |
| PAL   | rs174623:61635294:G:A     | rs174623    | 61635294 | 0.964 | 1 | 1 | a | g   | 0.5268 | 0.5298 | 0.0224  | 0.0117 | 0.05595 | ++ |
| ALA   | rs174606:61626973:G:T     | rs174606    | 61626973 | 0.977 | 1 | 1 | t | g   | 0.3876 | 0.3941 | 0.1053  | 0.0551 | 0.05597 | ++ |
| PLA   | rs116139751:61653164:C:T  | rs116139751 | 61653164 | 0.987 | 1 | 1 | t | c   | 0.0597 | 0.0682 | 0.1474  | 0.0772 | 0.05625 | +- |
| AA    | rs174453:61645967:C:G     | rs174453    | 61645967 | 0.953 | 1 | 1 | c | g   | 0.7435 | 0.759  | -0.0439 | 0.023  | 0.05626 | -- |
| EPA   | 11:61620274-T-C           | rs72643559  | 61620274 | 1     | 1 | 1 | t | c   | 0.9312 | 0.9413 | -0.1853 | 0.0971 | 0.0563  | -- |
| ALA   | rs74771917:61627960:C:T   | rs74771917  | 61627960 | 0.99  | 1 | 1 | t | c   | 0.097  | 0.0999 | 0.1697  | 0.0889 | 0.05637 | ++ |
| DHA   | rs174567:61593005:A:G     | rs174567    | 61593005 | 0.998 | 1 | 1 | a | g   | 0.8151 | 0.8152 | 0.059   | 0.0309 | 0.05645 | ++ |
| DPA6  | rs174587:61612830:C:T     | rs174587    | 61612830 | 0.961 | 1 | 1 | t | c   | 0.0976 | 0.1113 | -0.0898 | 0.0471 | 0.05651 | -- |
| DHA   | rs174458:61656995:C:T     | rs174458    | 61656995 | 1     | 1 | 1 | t | c   | 0.6214 | 0.6259 | 0.0494  | 0.0259 | 0.05653 | ++ |
| EIC9  | 11:61624181-T-C           | rs97384     | 61624181 | 1     | 1 | 1 | t | c   | 0.2561 | 0.2744 | -0.0543 | 0.0285 | 0.0566  | -- |
| OLE   | rs57668028:61591995:GAA:G | -           | 61591995 | 0.982 | 1 | 1 | g | gaa | 0.163  | 0.1686 | -0.0286 | 0.015  | 0.05668 | -- |
| DHA   | rs99780                   | rs99780     | 61596633 | 1     | 1 | 1 | t | c   | 0.1848 | 0.1885 | -0.0587 | 0.0308 | 0.05689 | -- |
| PAL   | rs174625:61636013:A:T     | rs174625    | 61636013 | 0.98  | 1 | 1 | a | t   | 0.2476 | 0.2629 | -0.0263 | 0.0138 | 0.05702 | -- |
| STE   | rs174473:61672235:T:C     | rs174473    | 61672235 | 0.984 | 1 | 1 | t | c   | 0.4917 | 0.5    | -0.0278 | 0.0146 | 0.05722 | -- |
| EDA   | rs174536                  | rs174536    | 61551927 | 1     | 1 | 1 | a | c   | 0.7916 | 0.7994 | -0.0659 | 0.0347 | 0.05741 | -- |
| NER   | rs3168072                 | rs3168072   | 61631510 | 1     | 1 | 1 | a | t   | 0.9312 | 0.9364 | -0.1817 | 0.0957 | 0.05751 | -- |
| ARA   | rs526126                  | rs526126    | 61624885 | 1     | 1 | 1 | c | g   | 0.8841 | 0.895  | 0.0555  | 0.0293 | 0.05793 | ++ |
| EDA   | rs528285                  | rs528285    | 61660704 | 0.955 | 1 | 1 | a | g   | 0.3479 | 0.3508 | 0.0528  | 0.0279 | 0.05806 | ++ |
| PLE   | 11:61657110-C-T           | rs174460    | 61657110 | 1     | 1 | 1 | t | c   | 0.6207 | 0.6262 | 0.0599  | 0.0317 | 0.05876 | ++ |
| DGLA  | rs174474:61672265:T:C     | rs174474    | 61672265 | 0.989 | 1 | 1 | t | c   | 0.499  | 0.5144 | 0.0457  | 0.0242 | 0.05886 | ++ |
| OLE   | rs174583                  | rs174583    | 61609750 | 1     | 1 | 1 | t | c   | 0.2006 | 0.2089 | -0.0263 | 0.0139 | 0.059   | -- |

|       |                                    |            |          |       |   |   |   |             |        |        |         |        |         |    |
|-------|------------------------------------|------------|----------|-------|---|---|---|-------------|--------|--------|---------|--------|---------|----|
| DHA   | 11:61657110-C-T                    | rs174460   | 61657110 | 1     | 1 | 1 | t | c           | 0.6207 | 0.6262 | 0.0489  | 0.0259 | 0.05915 | ++ |
| EIC9  | 11:61579463-A-G                    | rs174554   | 61579463 | 1     | 1 | 1 | a | g           | 0.8156 | 0.8156 | 0.0899  | 0.0477 | 0.05924 | ?+ |
| GLA   | rs174579                           | rs174579   | 61605613 | 0.998 | 1 | 1 | t | c           | 0.0912 | 0.1069 | 0.1752  | 0.0931 | 0.05975 | ++ |
| MUFA  | 11:61557826-T-C                    | rs102274   | 61557826 | 1     | 1 | 1 | t | c           | 0.7982 | 0.8035 | 0.0267  | 0.0142 | 0.05977 | ++ |
| EIC9  | rs174451:61642763:C:T              | rs174451   | 61642763 | 0.983 | 1 | 1 | t | c           | 0.1266 | 0.1271 | -0.0754 | 0.0401 | 0.05987 | -- |
| STE   | rs76095489:61664711:A:T            | rs76095489 | 61664711 | 0.907 | 1 | 1 | a | t           | 0.9297 | 0.9365 | 0.0517  | 0.0275 | 0.05989 | ++ |
| DTA   | 11:61557826-T-C                    | rs102274   | 61557826 | 1     | 1 | 1 | t | c           | 0.7982 | 0.8035 | 0.0756  | 0.0402 | 0.05993 | +- |
| DTA   | rs174565:61591636:C:G              | rs174565   | 61591636 | 0.997 | 1 | 1 | c | g           | 0.8668 | 0.8706 | 0.0863  | 0.0459 | 0.06018 | +- |
| DTA   | rs174536                           | rs174536   | 61551927 | 1     | 1 | 1 | a | c           | 0.7916 | 0.7994 | 0.0743  | 0.0396 | 0.06075 | ++ |
| LLA   | rs174602                           | rs174602   | 61624414 | 1     | 1 | 1 | t | c           | 0.7776 | 0.7822 | 0.0764  | 0.0407 | 0.0608  | ++ |
| BEH   | rs174626                           | rs174626   | 61637057 | 0.982 | 1 | 1 | a | g           | 0.5323 | 0.5363 | -0.0418 | 0.0223 | 0.06125 | -- |
| LAU   | rs143352979:61620628:AAACA<br>AC:A | -          | 61620628 | 0.934 | 1 | 1 | a | aaac<br>aac | 0.2703 | 0.2915 | 0.0707  | 0.0378 | 0.06129 | ++ |
| ARA   | 11:61604782-A-T                    | rs2524299  | 61604782 | 1     | 1 | 1 | a | t           | 0.8992 | 0.9235 | 0.0587  | 0.0314 | 0.0613  | ++ |
| DTA   | rs174538                           | rs174538   | 61560081 | 0.998 | 1 | 1 | a | g           | 0.1683 | 0.1741 | -0.0761 | 0.0407 | 0.06156 | -+ |
| GLA   | rs2727270:61603237:C:T             | rs2727270  | 61603237 | 0.998 | 1 | 1 | t | c           | 0.0765 | 0.1012 | -0.1565 | 0.0837 | 0.06164 | -- |
| BEH   | rs174590:61616977:G:C              | rs174590   | 61616977 | 0.981 | 1 | 1 | c | g           | 0.1133 | 0.122  | 0.0641  | 0.0343 | 0.06181 | ++ |
| OLE   | 11:61557826-T-C                    | rs102274   | 61557826 | 1     | 1 | 1 | t | c           | 0.7982 | 0.8035 | 0.0266  | 0.0143 | 0.06181 | ++ |
| PLA   | rs174464_61657926                  | rs174464   | 61657926 | 0.987 | 1 | 1 | a | g           | 0.3487 | 0.358  | 0.0756  | 0.0405 | 0.06194 | ++ |
| SFA   | rs13966                            | rs13966    | 61664992 | 1     | 1 | 1 | t | c           | 0.2541 | 0.2783 | -0.0228 | 0.0122 | 0.06205 | -- |
| PUFA  | 11:61549458-A-G                    | rs174534   | 61549458 | 1     | 1 | 1 | a | g           | 0.813  | 0.8152 | -0.0683 | 0.0366 | 0.06218 | -- |
| GLA   | 11:61603358-A-T                    | rs2727271  | 61603358 | 1     | 1 | 1 | a | t           | 0.8983 | 0.9235 | 0.156   | 0.0837 | 0.06244 | ++ |
| PLE   | rs6591668:61661113:T:C             | rs6591668  | 61661113 | 0.976 | 1 | 1 | t | c           | 0.0547 | 0.0589 | -0.135  | 0.0726 | 0.06302 | -- |
| LAU   | 11:61604782-A-T                    | rs2524299  | 61604782 | 1     | 1 | 1 | a | t           | 0.8992 | 0.9235 | -0.1023 | 0.055  | 0.06312 | -- |
| DTA   | 11:61592362-A-G                    | rs174566   | 61592362 | 1     | 1 | 1 | a | g           | 0.7774 | 0.7868 | 0.0688  | 0.037  | 0.06322 | +- |
| CAP   | rs3815045                          | rs3815045  | 61669946 | 1     | 1 | 1 | a | g           | 0.2697 | 0.2727 | -0.1047 | 0.0564 | 0.06328 | -- |
| ALA   | rs57668028:61591995:GAA:G          | -          | 61591995 | 0.982 | 1 | 1 | g | gaa         | 0.163  | 0.1686 | 0.1315  | 0.0709 | 0.06355 | ++ |
| PUFA3 | rs74771917:61627960:C:T            | rs74771917 | 61627960 | 0.99  | 1 | 1 | t | c           | 0.097  | 0.0999 | 0.1054  | 0.0568 | 0.06362 | ++ |
| DGLA  | rs174473:61672235:T:C              | rs174473   | 61672235 | 0.984 | 1 | 1 | t | c           | 0.4917 | 0.5    | 0.0449  | 0.0242 | 0.06367 | ++ |

|       |                           |            |          |       |   |   |    |     |        |        |         |        |         |    |
|-------|---------------------------|------------|----------|-------|---|---|----|-----|--------|--------|---------|--------|---------|----|
| PUFA6 | rs108499:61547237:C:T     | rs108499   | 61547237 | 0.985 | 1 | 1 | t  | c   | 0.1734 | 0.1744 | 0.0717  | 0.0386 | 0.06369 | ++ |
| PAL   | 11:61621194-G-A           | rs174598   | 61621194 | 1     | 1 | 1 | a  | g   | 0.2131 | 0.2167 | -0.0268 | 0.0145 | 0.06412 | -- |
| PUFA6 | rs102275                  | rs102275   | 61557803 | 1     | 1 | 1 | t  | c   | 0.7974 | 0.803  | -0.0673 | 0.0364 | 0.06412 | -- |
| PUFA  | 11:61557826-T-C           | rs102274   | 61557826 | 1     | 1 | 1 | t  | c   | 0.7982 | 0.8035 | -0.0671 | 0.0362 | 0.06421 | -- |
| PUFA  | rs174597:61621040:G:C     | rs174597   | 61621040 | 0.986 | 1 | 1 | c  | g   | 0.1246 | 0.128  | 0.0841  | 0.0454 | 0.06421 | ++ |
| BEH   | rs422249                  | rs422249   | 61639488 | 0.976 | 1 | 1 | t  | c   | 0.1873 | 0.1953 | 0.0562  | 0.0303 | 0.06423 | ++ |
| DGLA  | 11:61604782-A-T           | rs2524299  | 61604782 | 1     | 1 | 1 | a  | t   | 0.8992 | 0.9235 | 0.0724  | 0.0392 | 0.0644  | ++ |
| ALA   | rs528285                  | rs528285   | 61660704 | 0.955 | 1 | 1 | a  | g   | 0.3479 | 0.3508 | 0.0991  | 0.0536 | 0.06447 | ++ |
| STE   | 11:61604782-A-T           | rs2524299  | 61604782 | 1     | 1 | 1 | a  | t   | 0.8992 | 0.9235 | 0.0471  | 0.0255 | 0.06454 | ++ |
| MUFA  | rs102275                  | rs102275   | 61557803 | 1     | 1 | 1 | t  | c   | 0.7974 | 0.803  | 0.0261  | 0.0141 | 0.06488 | ++ |
| PLE   | rs7113281:61662780:G:A    | rs7113281  | 61662780 | 0.984 | 1 | 1 | a  | g   | 0.94   | 0.945  | 0.1327  | 0.0719 | 0.06498 | ++ |
| PAL   | rs174472:61671956:A:G     | rs174472   | 61671956 | 0.975 | 1 | 1 | a  | g   | 0.2874 | 0.2929 | -0.0246 | 0.0134 | 0.06529 | -- |
| ARA   | rs174587:61612830:C:T     | rs174587   | 61612830 | 0.961 | 1 | 1 | t  | c   | 0.0976 | 0.1113 | 0.0616  | 0.0334 | 0.06537 | ++ |
| BEH   | rs174597:61621040:G:C     | rs174597   | 61621040 | 0.986 | 1 | 1 | c  | g   | 0.1246 | 0.128  | 0.061   | 0.0331 | 0.0654  | ++ |
| PUFA6 | rs174538                  | rs174538   | 61560081 | 0.998 | 1 | 1 | a  | g   | 0.1683 | 0.1741 | 0.0709  | 0.0385 | 0.06547 | ++ |
| BEH   | rs6591668:61661113:T:C    | rs6591668  | 61661113 | 0.976 | 1 | 1 | t  | c   | 0.0547 | 0.0589 | 0.0933  | 0.0508 | 0.06597 | ++ |
| EIC9  | 11:61621194-G-A           | rs174598   | 61621194 | 1     | 1 | 1 | a  | g   | 0.2131 | 0.2167 | -0.058  | 0.0316 | 0.06599 | -- |
| DHA   | rs35473591:61586328:C:CT  | rs35473591 | 61586328 | 1     | 1 | 1 | ct | c   | 0.1844 | 0.1854 | -0.0572 | 0.0311 | 0.06604 | -- |
| DHA   | 11:61585144-A-G           | rs174562   | 61585144 | 1     | 1 | 1 | a  | g   | 0.8145 | 0.8156 | 0.0572  | 0.0311 | 0.06608 | ++ |
| LAU   | rs2526680:61611216:C:T    | rs2526680  | 61611216 | 0.969 | 1 | 1 | t  | c   | 0.0679 | 0.0804 | 0.1078  | 0.0587 | 0.06621 | ++ |
| BEH   | rs102275                  | rs102275   | 61557803 | 1     | 1 | 1 | t  | c   | 0.7974 | 0.803  | -0.0523 | 0.0285 | 0.06631 | -- |
| LAU   | 11:61629122-G-A           | rs174616   | 61629122 | 1     | 1 | 1 | a  | g   | 0.3808 | 0.387  | 0.0696  | 0.0379 | 0.06633 | ++ |
| LAU   | rs2072114                 | rs2072114  | 61605215 | 1     | 1 | 1 | a  | g   | 0.8992 | 0.9235 | -0.1011 | 0.055  | 0.06633 | -- |
| DGLA  | rs174597:61621040:G:C     | rs174597   | 61621040 | 0.986 | 1 | 1 | c  | g   | 0.1246 | 0.128  | 0.0735  | 0.04   | 0.06635 | ++ |
| EDA   | rs7394579:61581450:A:G    | rs7394579  | 61581450 | 0.984 | 1 | 1 | a  | g   | 0.8415 | 0.8467 | -0.0694 | 0.0378 | 0.0664  | -- |
| MUFA  | rs57668028:61591995:GAA:G | -          | 61591995 | 0.982 | 1 | 1 | g  | gaa | 0.163  | 0.1686 | -0.0273 | 0.0149 | 0.06644 | -- |
| STE   | rs174474:61672265:T:C     | rs174474   | 61672265 | 0.989 | 1 | 1 | t  | c   | 0.499  | 0.5144 | -0.0266 | 0.0145 | 0.06683 | -- |
| DGLA  | rs174468                  | rs174468   | 61663691 | 1     | 1 | 1 | a  | g   | 0.1639 | 0.187  | 0.0565  | 0.0308 | 0.06688 | ++ |
| CAP   | rs174607:61627321:G:C     | rs174607   | 61627321 | 0.964 | 1 | 1 | c  | g   | 0.0715 | 0.0808 | -0.184  | 0.1005 | 0.06706 | +- |



|         |                          |            |          |       |   |   |    |    |        |        |         |        |         |    |
|---------|--------------------------|------------|----------|-------|---|---|----|----|--------|--------|---------|--------|---------|----|
| DHA     | rs2072114                | rs2072114  | 61605215 | 1     | 1 | 1 | a  | g  | 0.8992 | 0.9235 | 0.0736  | 0.0402 | 0.06707 | ++ |
| LAU     | rs174615:61628964:T:A    | rs174615   | 61628964 | 0.998 | 1 | 1 | a  | t  | 0.3788 | 0.386  | 0.07    | 0.0383 | 0.0671  | ++ |
| DHA     | rs5792235:61596322:CA:C  | -          | 61596322 | 0.998 | 1 | 1 | ca | c  | 0.8131 | 0.8156 | 0.0569  | 0.0311 | 0.06716 | ++ |
| OLE     | rs174538                 | rs174538   | 61560081 | 0.998 | 1 | 1 | a  | g  | 0.1683 | 0.1741 | -0.0273 | 0.0149 | 0.06718 | -- |
| LAU     | rs174614:61628915:T:C    | rs174614   | 61628915 | 0.998 | 1 | 1 | t  | c  | 0.6139 | 0.6213 | -0.0699 | 0.0383 | 0.06764 | -- |
| OLE     | 11:61622227-T-C          | rs174600   | 61622227 | 0.996 | 1 | 1 | t  | c  | 0.7814 | 0.7847 | 0.0247  | 0.0135 | 0.06781 | ++ |
| PUFA3   | rs174579                 | rs174579   | 61605613 | 0.998 | 1 | 1 | t  | c  | 0.0912 | 0.1069 | 0.1083  | 0.0593 | 0.06786 | ++ |
| DTA     | 11:61548559-A-G          | rs509360   | 61548559 | 1     | 1 | 1 | a  | g  | 0.7226 | 0.736  | 0.064   | 0.0351 | 0.06789 | ++ |
| DPA     | rs174597:61621040:G:C    | rs174597   | 61621040 | 0.986 | 1 | 1 | c  | g  | 0.1246 | 0.128  | 0.0948  | 0.052  | 0.06839 | ++ |
| PAL     | rs174626                 | rs174626   | 61637057 | 0.982 | 1 | 1 | a  | g  | 0.5323 | 0.5363 | 0.0209  | 0.0114 | 0.06852 | ++ |
| PUFA6   | rs174535                 | rs174535   | 61551356 | 1     | 1 | 1 | t  | c  | 0.7936 | 0.803  | -0.066  | 0.0362 | 0.0686  | -- |
| MYR     | 11:61604967-C-T          | rs2072113  | 61604967 | 1     | 1 | 1 | t  | c  | 0.0757 | 0.1017 | 0.1013  | 0.0556 | 0.06874 | ++ |
| PLA     | rs174450:61641542:G:T    | rs174450   | 61641542 | 0.959 | 1 | 1 | t  | g  | 0.5806 | 0.5931 | -0.0744 | 0.0409 | 0.06882 | -- |
| LA      | rs174597:61621040:G:C    | rs174597   | 61621040 | 0.986 | 1 | 1 | c  | g  | 0.1246 | 0.128  | 0.0924  | 0.0508 | 0.06897 | +- |
| SQRAT63 | rs174451:61642763:C:T    | rs174451   | 61642763 | 0.983 | 1 | 1 | t  | c  | 0.1266 | 0.1271 | 0.1068  | 0.0588 | 0.06921 | ++ |
| DHA     | rs174553:61575158:A:G    | rs174553   | 61575158 | 0.999 | 1 | 1 | a  | g  | 0.8153 | 0.8156 | 0.0566  | 0.0312 | 0.06929 | ++ |
| OLE     | rs102275                 | rs102275   | 61557803 | 1     | 1 | 1 | t  | c  | 0.7974 | 0.803  | 0.0258  | 0.0142 | 0.06943 | ++ |
| SFA     | rs2235093:61665122:A:G   | rs2235093  | 61665122 | 0.975 | 1 | 1 | a  | g  | 0.2414 | 0.2581 | -0.023  | 0.0127 | 0.06952 | -- |
| MUFA    | 11:61579463-A-G          | rs174554   | 61579463 | 1     | 1 | 1 | a  | g  | 0.8156 | 0.8156 | 0.0335  | 0.0184 | 0.06953 | ?+ |
| DHA     | rs174551:61573684:T:C    | rs174551   | 61573684 | 1     | 1 | 1 | t  | c  | 0.8153 | 0.8156 | 0.0565  | 0.0312 | 0.06966 | ++ |
| DPA6    | rs174474:61672265:T:C    | rs174474   | 61672265 | 0.989 | 1 | 1 | t  | c  | 0.499  | 0.5144 | -0.0545 | 0.03   | 0.06969 | -- |
| DHA     | rs174550                 | rs174550   | 61571478 | 1     | 1 | 1 | t  | c  | 0.8154 | 0.8156 | 0.0565  | 0.0312 | 0.06983 | ++ |
| DHA     | rs174546                 | rs174546   | 61569830 | 1     | 1 | 1 | t  | c  | 0.1844 | 0.1846 | -0.0565 | 0.0312 | 0.06983 | -- |
| DHA     | 11:61569306-C-G          | rs174545   | 61569306 | 1     | 1 | 1 | c  | g  | 0.8154 | 0.8156 | 0.0565  | 0.0312 | 0.06983 | ++ |
| DHA     | rs174547                 | rs174547   | 61570783 | 1     | 1 | 1 | t  | c  | 0.8154 | 0.8156 | 0.0565  | 0.0312 | 0.06983 | ++ |
| LIG     | 11:61620274-T-C          | rs72643559 | 61620274 | 1     | 1 | 1 | t  | c  | 0.9312 | 0.9413 | 0.1184  | 0.0654 | 0.06997 | ++ |
| PLA     | rs35867597:61670459:AC:A | -          | 61670459 | 0.956 | 1 | 1 | a  | ac | 0.0757 | 0.0829 | 0.133   | 0.0734 | 0.07004 | -+ |
| ALA     | rs11407273:61627411:C:CT | rs11407273 | 61627411 | 0.988 | 1 | 1 | ct | c  | 0.6062 | 0.6108 | -0.0992 | 0.0548 | 0.07011 | -- |
| BEH     | rs7113281:61662780:G:A   | rs7113281  | 61662780 | 0.984 | 1 | 1 | a  | g  | 0.94   | 0.945  | -0.0907 | 0.0502 | 0.07048 | -- |

|         |                        |           |          |       |   |   |   |   |        |        |         |        |         |    |
|---------|------------------------|-----------|----------|-------|---|---|---|---|--------|--------|---------|--------|---------|----|
| SQRAT63 | 11:61647288-G-A        | rs7942717 | 61647288 | 1     | 1 | 1 | a | g | 0.9008 | 0.9077 | -0.1192 | 0.066  | 0.07091 | -- |
| DHA     | rs1535                 | rs1535    | 61597972 | 1     | 1 | 1 | a | g | 0.811  | 0.8156 | 0.056   | 0.031  | 0.07093 | ++ |
| MUFA    | rs174618               | rs174618  | 61629322 | 1     | 1 | 1 | t | c | 0.714  | 0.72   | 0.0235  | 0.013  | 0.07119 | ++ |
| MYR     | rs4564341:61573540:C:T | rs4564341 | 61573540 | 0.935 | 1 | 1 | t | c | 0.0606 | 0.0673 | 0.124   | 0.0688 | 0.07124 | ++ |
| PLE     | 11:61618608-A-G        | rs174592  | 61618608 | 1     | 1 | 1 | a | g | 0.7478 | 0.7589 | -0.0623 | 0.0346 | 0.07135 | -- |
| ELA     | rs422249               | rs422249  | 61639488 | 0.976 | 1 | 1 | t | c | 0.1873 | 0.1953 | 0.105   | 0.0583 | 0.07154 | -+ |
| AA      | rs174470:61669608:G:A  | rs174470  | 61669608 | 0.993 | 1 | 1 | a | g | 0.2961 | 0.3038 | 0.0371  | 0.0206 | 0.07168 | -+ |
| LAU     | 11:61603358-A-T        | rs2727271 | 61603358 | 1     | 1 | 1 | a | t | 0.8983 | 0.9235 | -0.099  | 0.055  | 0.07175 | -- |
| LAU     | rs2727270:61603237:C:T | rs2727270 | 61603237 | 0.998 | 1 | 1 | t | c | 0.0765 | 0.1012 | 0.0989  | 0.055  | 0.07217 | ++ |
| PLE     | 11:61647288-G-A        | rs7942717 | 61647288 | 1     | 1 | 1 | a | g | 0.9008 | 0.9077 | 0.1049  | 0.0584 | 0.07226 | -+ |
| GLA     | 11:61604782-A-T        | rs2524299 | 61604782 | 1     | 1 | 1 | a | t | 0.8992 | 0.9235 | 0.149   | 0.0829 | 0.07242 | ++ |
| DTA     | rs4246215              | rs4246215 | 61564299 | 0.995 | 1 | 1 | t | g | 0.1899 | 0.1976 | -0.0713 | 0.0397 | 0.07248 | -+ |
| LAU     | rs174613:61628492:G:A  | rs174613  | 61628492 | 0.997 | 1 | 1 | a | g | 0.3785 | 0.3872 | 0.0686  | 0.0382 | 0.07261 | ++ |
| CAP     | rs174469:61667443:C:T  | rs174469  | 61667443 | 0.987 | 1 | 1 | t | c | 0.2978 | 0.3066 | -0.0976 | 0.0544 | 0.07269 | -- |
| ELA     | rs174455               | rs174455  | 61656117 | 1     | 1 | 1 | a | g | 0.5959 | 0.6002 | -0.0854 | 0.0476 | 0.07276 | -- |
| PUFA6   | rs174536               | rs174536  | 61551927 | 1     | 1 | 1 | a | c | 0.7916 | 0.7994 | -0.0644 | 0.0359 | 0.07293 | -- |
| EPA     | rs422249               | rs422249  | 61639488 | 0.976 | 1 | 1 | t | c | 0.1873 | 0.1953 | -0.1128 | 0.0629 | 0.07295 | -- |
| SQRAT63 | 11:61604782-A-T        | rs2524299 | 61604782 | 1     | 1 | 1 | a | t | 0.8992 | 0.9235 | -0.1014 | 0.0567 | 0.07339 | -- |
| PUFA    | rs108499:61547237:C:T  | rs108499  | 61547237 | 0.985 | 1 | 1 | t | c | 0.1734 | 0.1744 | 0.0684  | 0.0382 | 0.07349 | ++ |
| PLA     | rs174466:61659296:A:G  | rs174466  | 61659296 | 0.966 | 1 | 1 | a | g | 0.359  | 0.3611 | 0.072   | 0.0402 | 0.07356 | ++ |
| ALA     | 11:61549458-A-G        | rs174534  | 61549458 | 1     | 1 | 1 | a | g | 0.813  | 0.8152 | -0.1222 | 0.0683 | 0.07376 | -- |
| OLE     | 11:61621194-G-A        | rs174598  | 61621194 | 1     | 1 | 1 | a | g | 0.2131 | 0.2167 | -0.0242 | 0.0136 | 0.07376 | -- |
| ALA     | rs108499:61547237:C:T  | rs108499  | 61547237 | 0.985 | 1 | 1 | t | c | 0.1734 | 0.1744 | 0.1259  | 0.0704 | 0.07382 | ++ |
| LA      | 11:61629122-G-A        | rs174616  | 61629122 | 1     | 1 | 1 | a | g | 0.3808 | 0.387  | 0.0575  | 0.0322 | 0.0742  | ++ |
| MYR     | rs2727263:61618012:C:T | rs2727263 | 61618012 | 0.975 | 1 | 1 | t | c | 0.086  | 0.0874 | 0.0978  | 0.0548 | 0.07423 | ++ |
| PAL     | 11:61548559-A-G        | rs509360  | 61548559 | 1     | 1 | 1 | a | g | 0.7226 | 0.736  | 0.0245  | 0.0137 | 0.07423 | ++ |
| DPA6    | rs174602               | rs174602  | 61624414 | 1     | 1 | 1 | t | c | 0.7776 | 0.7822 | 0.061   | 0.0343 | 0.07532 | ++ |
| PLE     | rs174594:61619829:C:A  | rs174594  | 61619829 | 0.997 | 1 | 1 | a | c | 0.7473 | 0.7596 | -0.0614 | 0.0346 | 0.0756  | -- |
| DHA     | 11:61606642-A-G        | rs174580  | 61606642 | 1     | 1 | 1 | a | g | 0.8005 | 0.8108 | 0.0543  | 0.0306 | 0.07573 | ++ |

|         |                        |           |          |       |   |   |   |   |        |        |         |        |         |    |
|---------|------------------------|-----------|----------|-------|---|---|---|---|--------|--------|---------|--------|---------|----|
| PAL     | 11:61622227-T-C        | rs174600  | 61622227 | 0.996 | 1 | 1 | t | c | 0.7814 | 0.7847 | 0.0257  | 0.0145 | 0.07574 | ++ |
| PLE     | rs174449               | rs174449  | 61640379 | 1     | 1 | 1 | a | g | 0.5785 | 0.5921 | 0.0556  | 0.0313 | 0.07576 | ++ |
| LIG     | 11:61592362-A-G        | rs174566  | 61592362 | 1     | 1 | 1 | a | g | 0.7774 | 0.7868 | -0.0602 | 0.0339 | 0.07585 | -- |
| EPA     | rs174549               | rs174549  | 61571382 | 1     | 1 | 1 | a | g | 0.1712 | 0.173  | -0.1133 | 0.0638 | 0.07589 | -- |
| EPA     | rs174555:61579760:T:C  | rs174555  | 61579760 | 1     | 1 | 1 | t | c | 0.827  | 0.8288 | 0.1133  | 0.0638 | 0.07589 | ++ |
| SQRAT63 | 11:61603358-A-T        | rs2727271 | 61603358 | 1     | 1 | 1 | a | t | 0.8983 | 0.9235 | -0.1001 | 0.0564 | 0.07592 | -- |
| EPA     | rs174557:61581368:A:G  | rs174557  | 61581368 | 0.999 | 1 | 1 | a | g | 0.827  | 0.8285 | 0.1131  | 0.0637 | 0.07593 | ++ |
| EPA     | 11:61582708-T-C        | rs174561  | 61582708 | 1     | 1 | 1 | t | c | 0.827  | 0.8288 | 0.1132  | 0.0638 | 0.07604 | ++ |
| SQRAT63 | rs2727270:61603237:C:T | rs2727270 | 61603237 | 0.998 | 1 | 1 | t | c | 0.0765 | 0.1012 | 0.1     | 0.0564 | 0.0761  | ++ |
| ARA     | rs174595:61619893:C:T  | rs174595  | 61619893 | 0.996 | 1 | 1 | t | c | 0.1167 | 0.1239 | 0.055   | 0.031  | 0.07616 | ++ |
| GLA     | 11:61604967-C-T        | rs2072113 | 61604967 | 1     | 1 | 1 | t | c | 0.0757 | 0.1017 | -0.1469 | 0.0829 | 0.07623 | -- |
| BEH     | rs174595:61619893:C:T  | rs174595  | 61619893 | 0.996 | 1 | 1 | t | c | 0.1167 | 0.1239 | 0.0602  | 0.0339 | 0.07629 | ++ |
| PUFA    | rs102275               | rs102275  | 61557803 | 1     | 1 | 1 | t | c | 0.7974 | 0.803  | -0.0639 | 0.0361 | 0.07638 | -- |
| LAU     | rs2727263:61618012:C:T | rs2727263 | 61618012 | 0.975 | 1 | 1 | t | c | 0.086  | 0.0874 | 0.0974  | 0.0551 | 0.07699 | ++ |
| PUFA6   | rs174597:61621040:G:C  | rs174597  | 61621040 | 0.986 | 1 | 1 | c | g | 0.1246 | 0.128  | 0.0811  | 0.0459 | 0.07722 | +- |
| LAU     | rs174473:61672235:T:C  | rs174473  | 61672235 | 0.984 | 1 | 1 | t | c | 0.4917 | 0.5    | 0.0614  | 0.0348 | 0.07731 | ++ |
| STE     | rs174589:61615803:C:G  | rs174589  | 61615803 | 0.973 | 1 | 1 | c | g | 0.8774 | 0.8859 | -0.0429 | 0.0243 | 0.07746 | -- |
| ALA     | rs174537               | rs174537  | 61552680 | 1     | 1 | 1 | t | g | 0.194  | 0.2002 | 0.118   | 0.0669 | 0.07781 | ++ |
| DTA     | rs102275               | rs102275  | 61557803 | 1     | 1 | 1 | t | c | 0.7974 | 0.803  | 0.0706  | 0.0401 | 0.0779  | +- |
| MYR     | rs2526680:61611216:C:T | rs2526680 | 61611216 | 0.969 | 1 | 1 | t | c | 0.0679 | 0.0804 | 0.1059  | 0.0601 | 0.07795 | ++ |
| OLE     | rs174565:61591636:C:G  | rs174565  | 61591636 | 0.997 | 1 | 1 | c | g | 0.8668 | 0.8706 | 0.0292  | 0.0166 | 0.07795 | ++ |
| BEH     | rs108499:61547237:C:T  | rs108499  | 61547237 | 0.985 | 1 | 1 | t | c | 0.1734 | 0.1744 | 0.0539  | 0.0306 | 0.07797 | ++ |
| PUFA    | rs174589:61615803:C:G  | rs174589  | 61615803 | 0.973 | 1 | 1 | c | g | 0.8774 | 0.8859 | -0.0833 | 0.0473 | 0.078   | -- |
| LA      | rs174589:61615803:C:G  | rs174589  | 61615803 | 0.973 | 1 | 1 | c | g | 0.8774 | 0.8859 | -0.0933 | 0.053  | 0.07814 | -- |
| NER     | 11:61647288-G-A        | rs7942717 | 61647288 | 1     | 1 | 1 | a | g | 0.9008 | 0.9077 | 0.1329  | 0.0755 | 0.07837 | ++ |
| PUFA    | rs174538               | rs174538  | 61560081 | 0.998 | 1 | 1 | a | g | 0.1683 | 0.1741 | 0.0669  | 0.0381 | 0.0785  | ++ |
| LAU     | rs2851682              | rs2851682 | 61616012 | 0.983 | 1 | 1 | a | g | 0.9162 | 0.9209 | -0.0968 | 0.0551 | 0.07876 | -- |
| LA      | rs174570               | rs174570  | 61597212 | 1     | 1 | 1 | t | c | 0.1279 | 0.1324 | 0.0799  | 0.0455 | 0.07909 | ++ |
| ALA     | rs174595:61619893:C:T  | rs174595  | 61619893 | 0.996 | 1 | 1 | t | c | 0.1167 | 0.1239 | 0.1513  | 0.0862 | 0.0792  | +- |

|         |                                                      |             |          |       |   |   |   |             |        |        |         |        |         |    |
|---------|------------------------------------------------------|-------------|----------|-------|---|---|---|-------------|--------|--------|---------|--------|---------|----|
| STE     | rs2524296:61601378:C:T<br>rs143352979:61620628:AAACA | rs2524296   | 61601378 | 0.997 | 1 | 1 | t | c           | 0.0634 | 0.0773 | -0.0466 | 0.0266 | 0.07947 | -- |
| MYR     | AC:A                                                 | -           | 61620628 | 0.934 | 1 | 1 | a | aaac<br>aac | 0.2703 | 0.2915 | 0.065   | 0.037  | 0.07951 | ++ |
| DPA6    | rs174473:61672235:T:C                                | rs174473    | 61672235 | 0.984 | 1 | 1 | t | c           | 0.4917 | 0.5    | -0.0534 | 0.0304 | 0.07952 | -- |
| DHA     | rs1000778                                            | rs1000778   | 61655305 | 1     | 1 | 1 | a | g           | 0.3391 | 0.3483 | -0.047  | 0.0268 | 0.07954 | -- |
| LIG     | 11:61579463-A-G                                      | rs174554    | 61579463 | 1     | 1 | 1 | a | g           | 0.8156 | 0.8156 | -0.0972 | 0.0555 | 0.07977 | ?- |
| ALA     | rs174533:61549025:G:A                                | rs174533    | 61549025 | 0.986 | 1 | 1 | a | g           | 0.1988 | 0.2053 | 0.1161  | 0.0664 | 0.08011 | ++ |
| CAP     | rs74771917:61627960:C:T                              | rs74771917  | 61627960 | 0.99  | 1 | 1 | t | c           | 0.097  | 0.0999 | 0.1343  | 0.0768 | 0.08026 | ++ |
| EPA     | rs76095489:61664711:A:T                              | rs76095489  | 61664711 | 0.907 | 1 | 1 | a | t           | 0.9297 | 0.9365 | -0.1697 | 0.097  | 0.08039 | -- |
| MUFA    | rs174533:61549025:G:A                                | rs174533    | 61549025 | 0.986 | 1 | 1 | a | g           | 0.1988 | 0.2053 | -0.0245 | 0.014  | 0.08065 | -- |
| AA      | rs174469:61667443:C:T                                | rs174469    | 61667443 | 0.987 | 1 | 1 | t | c           | 0.2978 | 0.3066 | 0.0361  | 0.0207 | 0.0807  | +- |
| PLE     | rs116139751:61653164:C:T                             | rs116139751 | 61653164 | 0.987 | 1 | 1 | t | c           | 0.0597 | 0.0682 | -0.1218 | 0.0697 | 0.0807  | +- |
| MUFA    | rs174538                                             | rs174538    | 61560081 | 0.998 | 1 | 1 | a | g           | 0.1683 | 0.1741 | -0.0258 | 0.0148 | 0.08085 | -- |
| PLE     | rs35867597:61670459:AC:A                             | -           | 61670459 | 0.956 | 1 | 1 | a | ac          | 0.0757 | 0.0829 | -0.1065 | 0.061  | 0.08088 | -- |
| LA      | rs7394579:61581450:A:G                               | rs7394579   | 61581450 | 0.984 | 1 | 1 | a | g           | 0.8415 | 0.8467 | -0.0763 | 0.0438 | 0.08096 | -- |
| DHA     | rs174576                                             | rs174576    | 61603510 | 1     | 1 | 1 | a | c           | 0.1866 | 0.1976 | -0.0539 | 0.0309 | 0.0811  | -- |
| MYR     | 11:61604782-A-T                                      | rs2524299   | 61604782 | 1     | 1 | 1 | a | t           | 0.8992 | 0.9235 | -0.0967 | 0.0555 | 0.08113 | -- |
| BEH     | 11:61557826-T-C                                      | rs102274    | 61557826 | 1     | 1 | 1 | t | c           | 0.7982 | 0.8035 | -0.0502 | 0.0288 | 0.08114 | -- |
| PUFA    | rs174535                                             | rs174535    | 61551356 | 1     | 1 | 1 | t | c           | 0.7936 | 0.803  | -0.0626 | 0.0359 | 0.08124 | -- |
| AA      | rs1151139:61671156:C:T                               | rs1151139   | 61671156 | 0.986 | 1 | 1 | t | c           | 0.2938 | 0.3011 | 0.0358  | 0.0206 | 0.08194 | +- |
| LIG     | 11:61549458-A-G                                      | rs174534    | 61549458 | 1     | 1 | 1 | a | g           | 0.813  | 0.8152 | -0.0619 | 0.0356 | 0.0822  | -- |
| BEH     | rs57668028:61591995:GAA:G                            | -           | 61591995 | 0.982 | 1 | 1 | g | gaa         | 0.163  | 0.1686 | 0.054   | 0.0311 | 0.08222 | ++ |
| SQRAT63 | rs174449                                             | rs174449    | 61640379 | 1     | 1 | 1 | a | g           | 0.5785 | 0.5921 | -0.0646 | 0.0372 | 0.0826  | -- |
| DTA     | rs108499:61547237:C:T                                | rs108499    | 61547237 | 0.985 | 1 | 1 | t | c           | 0.1734 | 0.1744 | -0.0712 | 0.0411 | 0.08278 | +- |
| LAU     | 11:61627811-T-C                                      | rs174609    | 61627811 | 1     | 1 | 1 | t | c           | 0.6119 | 0.6219 | -0.0661 | 0.0381 | 0.08291 | -- |
| STE     | rs2845574:61601872:C:T                               | rs2845574   | 61601872 | 0.997 | 1 | 1 | t | c           | 0.0634 | 0.0774 | -0.046  | 0.0265 | 0.08291 | -- |
| PLE     | rs174464_61657926                                    | rs174464    | 61657926 | 0.987 | 1 | 1 | a | g           | 0.3487 | 0.358  | -0.0561 | 0.0324 | 0.08292 | -- |
| LAU     | rs1151139:61671156:C:T                               | rs1151139   | 61671156 | 0.986 | 1 | 1 | t | c           | 0.2938 | 0.3011 | -0.0653 | 0.0377 | 0.08299 | -- |
| BEH     | rs35867597:61670459:AC:A                             | -           | 61670459 | 0.956 | 1 | 1 | a | ac          | 0.0757 | 0.0829 | 0.0735  | 0.0424 | 0.08303 | ++ |

|         |                         |             |          |       |   |   |    |   |        |        |         |        |         |    |
|---------|-------------------------|-------------|----------|-------|---|---|----|---|--------|--------|---------|--------|---------|----|
| PUFA3   | rs174595:61619893:C:T   | rs174595    | 61619893 | 0.996 | 1 | 1 | t  | c | 0.1167 | 0.1239 | 0.0911  | 0.0526 | 0.0831  | ++ |
| STE     | rs2845573:61601908:A:G  | rs2845573   | 61601908 | 0.997 | 1 | 1 | a  | g | 0.9226 | 0.9366 | 0.046   | 0.0265 | 0.08318 | ++ |
| OLE     | rs174550                | rs174550    | 61571478 | 1     | 1 | 1 | t  | c | 0.8154 | 0.8156 | 0.0251  | 0.0145 | 0.08319 | ++ |
| OLE     | rs174546                | rs174546    | 61569830 | 1     | 1 | 1 | t  | c | 0.1844 | 0.1846 | -0.0251 | 0.0145 | 0.08319 | -- |
| OLE     | 11:61569306-C-G         | rs174545    | 61569306 | 1     | 1 | 1 | c  | g | 0.8154 | 0.8156 | 0.0251  | 0.0145 | 0.08319 | ++ |
| OLE     | rs174547                | rs174547    | 61570783 | 1     | 1 | 1 | t  | c | 0.8154 | 0.8156 | 0.0251  | 0.0145 | 0.08319 | ++ |
| LAU     | rs2845572:61614595:G:A  | rs2845572   | 61614595 | 0.98  | 1 | 1 | a  | g | 0.0783 | 0.084  | 0.0958  | 0.0553 | 0.0833  | ++ |
| EPA     | rs174544:61567753:C:A   | rs174544    | 61567753 | 0.997 | 1 | 1 | a  | c | 0.1712 | 0.1719 | -0.111  | 0.0641 | 0.08331 | -- |
| OLE     | rs174551:61573684:T:C   | rs174551    | 61573684 | 1     | 1 | 1 | t  | c | 0.8153 | 0.8156 | 0.025   | 0.0145 | 0.08377 | ++ |
| DHA     | 11:61593816-C-T         | rs174568    | 61593816 | 1     | 1 | 1 | t  | c | 0.1826 | 0.1827 | -0.0545 | 0.0315 | 0.08384 | -- |
| DHA     | rs174559:61581656:G:A   | rs174559    | 61581656 | 0.999 | 1 | 1 | a  | g | 0.1566 | 0.1611 | -0.0564 | 0.0326 | 0.08394 | -- |
| OLE     | rs174570                | rs174570    | 61597212 | 1     | 1 | 1 | t  | c | 0.1279 | 0.1324 | -0.0291 | 0.0168 | 0.08401 | -- |
| EPA     | rs28456:61589481:A:G    | rs28456     | 61589481 | 1     | 1 | 1 | a  | g | 0.827  | 0.8278 | 0.11    | 0.0637 | 0.08408 | ++ |
| EPA     | 11:61581764-T-C         | rs174560    | 61581764 | 1     | 1 | 1 | t  | c | 0.827  | 0.8278 | 0.11    | 0.0637 | 0.08409 | ++ |
| EPA     | rs174548                | rs174548    | 61571348 | 1     | 1 | 1 | c  | g | 0.827  | 0.8278 | 0.11    | 0.0637 | 0.08409 | ++ |
| SQRAT63 | 11:61604967-C-T         | rs2072113   | 61604967 | 1     | 1 | 1 | t  | c | 0.0757 | 0.1017 | 0.0976  | 0.0565 | 0.08417 | ++ |
| DTA     | rs174533:61549025:G:A   | rs174533    | 61549025 | 0.986 | 1 | 1 | a  | g | 0.1988 | 0.2053 | -0.0693 | 0.0402 | 0.08425 | -+ |
| OLE     | rs174553:61575158:A:G   | rs174553    | 61575158 | 0.999 | 1 | 1 | a  | g | 0.8153 | 0.8156 | 0.025   | 0.0145 | 0.08425 | ++ |
| EPA     | 11:61580635-C-T         | rs174556    | 61580635 | 1     | 1 | 1 | t  | c | 0.1697 | 0.1711 | -0.1116 | 0.0646 | 0.08428 | -- |
| PUFA6   | 11:61629122-G-A         | rs174616    | 61629122 | 1     | 1 | 1 | a  | g | 0.3808 | 0.387  | 0.0499  | 0.0289 | 0.08437 | ++ |
| ALA     | rs174587:61612830:C:T   | rs174587    | 61612830 | 0.961 | 1 | 1 | t  | c | 0.0976 | 0.1113 | 0.1592  | 0.0924 | 0.08477 | ++ |
| PUFA    | rs174536                | rs174536    | 61551927 | 1     | 1 | 1 | a  | c | 0.7916 | 0.7994 | -0.0613 | 0.0356 | 0.08532 | -- |
| LA      | rs174565:61591636:C:G   | rs174565    | 61591636 | 0.997 | 1 | 1 | c  | g | 0.8668 | 0.8706 | -0.0775 | 0.0451 | 0.08574 | -- |
| GLA     | rs174597:61621040:G:C   | rs174597    | 61621040 | 0.986 | 1 | 1 | c  | g | 0.1246 | 0.128  | 0.1359  | 0.0792 | 0.08591 | ++ |
| OLE     | rs3834458:61594920:CT:C | rs774882452 | 61594920 | 0.996 | 1 | 1 | ct | c | 0.8157 | 0.8165 | 0.025   | 0.0145 | 0.08609 | ++ |
| EPA     | rs174559:61581656:G:A   | rs174559    | 61581656 | 0.999 | 1 | 1 | a  | g | 0.1566 | 0.1611 | -0.1114 | 0.0649 | 0.08614 | -- |
| EPA     | rs7394579:61581450:A:G  | rs7394579   | 61581450 | 0.984 | 1 | 1 | a  | g | 0.8415 | 0.8467 | 0.1129  | 0.0659 | 0.08651 | ++ |
| LIG     | rs4246215               | rs4246215   | 61564299 | 0.995 | 1 | 1 | t  | g | 0.1899 | 0.1976 | 0.0618  | 0.036  | 0.08654 | ++ |
| EIC9    | rs3168072               | rs3168072   | 61631510 | 1     | 1 | 1 | a  | t | 0.9312 | 0.9364 | -0.0967 | 0.0564 | 0.08658 | -+ |

|       |                             |             |          |       |   |   |    |    |        |        |         |        |         |    |
|-------|-----------------------------|-------------|----------|-------|---|---|----|----|--------|--------|---------|--------|---------|----|
| PUFA6 | rs174559:61581656:G:A       | rs174559    | 61581656 | 0.999 | 1 | 1 | a  | g  | 0.1566 | 0.1611 | 0.0669  | 0.039  | 0.08659 | ++ |
| OLE   | rs174533:61549025:G:A       | rs174533    | 61549025 | 0.986 | 1 | 1 | a  | g  | 0.1988 | 0.2053 | -0.0242 | 0.0141 | 0.08663 | -- |
| STE   | rs138766446:61602458:CCCA:C | rs765564188 | 61602458 | 0.992 | 1 | 1 | cc | c  | 0.9218 | 0.9365 | 0.0454  | 0.0265 | 0.08678 | ++ |
| CAP   | rs174604:61626270:C:G       | rs174604    | 61626270 | 0.954 | 1 | 1 | c  | g  | 0.6202 | 0.6275 | -0.0884 | 0.0516 | 0.08687 | -- |
| LA    | rs3834458:61594920:CT:C     | rs774882452 | 61594920 | 0.996 | 1 | 1 | ct | c  | 0.8157 | 0.8165 | -0.0702 | 0.0411 | 0.08712 | -- |
| OLE   | 11:61606683-G-A             | rs174581    | 61606683 | 1     | 1 | 1 | a  | g  | 0.1866 | 0.1948 | -0.0246 | 0.0144 | 0.08717 | -- |
| DTA   | rs2727265:61609004:C:A      | rs2727265   | 61609004 | 0.989 | 1 | 1 | a  | c  | 0.0635 | 0.0764 | -0.0965 | 0.0565 | 0.08724 | -- |
| AA    | 11:61620274-T-C             | rs72643559  | 61620274 | 1     | 1 | 1 | t  | c  | 0.9312 | 0.9413 | -0.0572 | 0.0334 | 0.08742 | -- |
| LA    | 11:61593816-C-T             | rs174568    | 61593816 | 1     | 1 | 1 | t  | c  | 0.1826 | 0.1827 | 0.0706  | 0.0413 | 0.08759 | ++ |
| STE   | rs2727270:61603237:C:T      | rs2727270   | 61603237 | 0.998 | 1 | 1 | t  | c  | 0.0765 | 0.1012 | -0.0437 | 0.0256 | 0.08794 | -- |
| STE   | 11:61603358-A-T             | rs2727271   | 61603358 | 1     | 1 | 1 | a  | t  | 0.8983 | 0.9235 | 0.0437  | 0.0256 | 0.08798 | ++ |
| MUFA  | rs174535                    | rs174535    | 61551356 | 1     | 1 | 1 | t  | c  | 0.7936 | 0.803  | 0.0242  | 0.0142 | 0.08805 | ++ |
| AA    | rs3815045                   | rs3815045   | 61669946 | 1     | 1 | 1 | a  | g  | 0.2697 | 0.2727 | 0.0361  | 0.0212 | 0.08837 | -+ |
| DHA   | rs35867597:61670459:AC:A    | -           | 61670459 | 0.956 | 1 | 1 | a  | ac | 0.0757 | 0.0829 | -0.0829 | 0.0487 | 0.08859 | -- |
| PLA   | rs13966                     | rs13966     | 61664992 | 1     | 1 | 1 | t  | c  | 0.2541 | 0.2783 | 0.0734  | 0.0431 | 0.08859 | ++ |
| ARA   | rs93923:61613745:C:T        | rs93923     | 61613745 | 0.961 | 1 | 1 | t  | c  | 0.0971 | 0.1119 | 0.0573  | 0.0337 | 0.08885 | ++ |
| STE   | rs174590:61616977:G:C       | rs174590    | 61616977 | 0.981 | 1 | 1 | c  | g  | 0.1133 | 0.122  | 0.0416  | 0.0245 | 0.08909 | ++ |
| PUFA  | 11:61629122-G-A             | rs174616    | 61629122 | 1     | 1 | 1 | a  | g  | 0.3808 | 0.387  | 0.0488  | 0.0287 | 0.08944 | ++ |
| PAL   | rs174474:61672265:T:C       | rs174474    | 61672265 | 0.989 | 1 | 1 | t  | c  | 0.499  | 0.5144 | -0.0195 | 0.0115 | 0.08972 | -- |
| LAU   | rs174604:61626270:C:G       | rs174604    | 61626270 | 0.954 | 1 | 1 | c  | g  | 0.6202 | 0.6275 | -0.0668 | 0.0394 | 0.09003 | -- |
| MYR   | rs2072114                   | rs2072114   | 61605215 | 1     | 1 | 1 | a  | g  | 0.8992 | 0.9235 | -0.094  | 0.0555 | 0.09009 | -- |
| OLE   | 11:61606642-A-G             | rs174580    | 61606642 | 1     | 1 | 1 | a  | g  | 0.8005 | 0.8108 | 0.0243  | 0.0144 | 0.09011 | ++ |
| PLE   | rs1000778                   | rs1000778   | 61655305 | 1     | 1 | 1 | a  | g  | 0.3391 | 0.3483 | -0.0552 | 0.0326 | 0.09041 | -- |
| OLE   | rs35473591:61586328:C:CT    | rs35473591  | 61586328 | 1     | 1 | 1 | ct | c  | 0.1844 | 0.1854 | -0.0245 | 0.0145 | 0.09079 | -- |
| AA    | rs528285                    | rs528285    | 61660704 | 0.955 | 1 | 1 | a  | g  | 0.3479 | 0.3508 | -0.0327 | 0.0194 | 0.0908  | -- |
| GLA   | rs2072114                   | rs2072114   | 61605215 | 1     | 1 | 1 | a  | g  | 0.8992 | 0.9235 | 0.1401  | 0.0828 | 0.09084 | ++ |
| MUFA  | rs174620:61629747:A:G       | rs174620    | 61629747 | 0.996 | 1 | 1 | a  | g  | 0.7131 | 0.7207 | 0.0222  | 0.0131 | 0.09089 | ++ |
| OLE   | 11:61585144-A-G             | rs174562    | 61585144 | 1     | 1 | 1 | a  | g  | 0.8145 | 0.8156 | 0.0245  | 0.0145 | 0.09109 | ++ |

|      |                             |             |          |       |   |   |          |   |        |        |         |        |         |    |
|------|-----------------------------|-------------|----------|-------|---|---|----------|---|--------|--------|---------|--------|---------|----|
| DHA  | rs2524296:61601378:C:T      | rs2524296   | 61601378 | 0.997 | 1 | 1 | t        | c | 0.0634 | 0.0773 | -0.0748 | 0.0443 | 0.0913  | -- |
| DHA  | rs174451:61642763:C:T       | rs174451    | 61642763 | 0.983 | 1 | 1 | t        | c | 0.1266 | 0.1271 | -0.0661 | 0.0391 | 0.09131 | -- |
| OLE  | rs174576                    | rs174576    | 61603510 | 1     | 1 | 1 | a        | c | 0.1866 | 0.1976 | -0.0245 | 0.0145 | 0.09147 | -- |
| DTA  | rs2845573:61601908:A:G      | rs2845573   | 61601908 | 0.997 | 1 | 1 | a        | g | 0.9226 | 0.9366 | 0.0959  | 0.0568 | 0.0915  | ++ |
| DTA  | rs2845574:61601872:C:T      | rs2845574   | 61601872 | 0.997 | 1 | 1 | t        | c | 0.0634 | 0.0774 | -0.0959 | 0.0568 | 0.09153 | -- |
| LIG  | rs7394579:61581450:A:G      | rs7394579   | 61581450 | 0.984 | 1 | 1 | a        | g | 0.8415 | 0.8467 | -0.0643 | 0.0381 | 0.09169 | -- |
| LA   | rs174590:61616977:G:C       | rs174590    | 61616977 | 0.981 | 1 | 1 | c        | g | 0.1133 | 0.122  | 0.0887  | 0.0526 | 0.09179 | +- |
| LIG  | rs174538                    | rs174538    | 61560081 | 0.998 | 1 | 1 | a        | g | 0.1683 | 0.1741 | 0.0615  | 0.0365 | 0.09179 | ++ |
| DTA  | rs138766446:61602458:CCCA:C | rs765564188 | 61602458 | 0.992 | 1 | 1 | cc<br>ca | c | 0.9218 | 0.9365 | 0.0956  | 0.0567 | 0.09186 | ++ |
| ALA  | rs93923:61613745:C:T        | rs93923     | 61613745 | 0.961 | 1 | 1 | t        | c | 0.0971 | 0.1119 | 0.1555  | 0.0923 | 0.09187 | ++ |
| DHA  | rs2845574:61601872:C:T      | rs2845574   | 61601872 | 0.997 | 1 | 1 | t        | c | 0.0634 | 0.0774 | -0.0745 | 0.0442 | 0.09208 | -- |
| EDA  | rs138766446:61602458:CCCA:C | rs765564188 | 61602458 | 0.992 | 1 | 1 | cc<br>ca | c | 0.9218 | 0.9365 | -0.0841 | 0.0499 | 0.09212 | -- |
| DHA  | rs2845573:61601908:A:G      | rs2845573   | 61601908 | 0.997 | 1 | 1 | a        | g | 0.9226 | 0.9366 | 0.0745  | 0.0442 | 0.09215 | ++ |
| DHA  | 11:61605499-T-A             | rs174578    | 61605499 | 1     | 1 | 1 | a        | t | 0.1844 | 0.192  | -0.0522 | 0.031  | 0.09233 | -- |
| DHA  | rs174577                    | rs174577    | 61604814 | 1     | 1 | 1 | a        | c | 0.1844 | 0.192  | -0.0522 | 0.031  | 0.09233 | -- |
| DTA  | rs2524296:61601378:C:T      | rs2524296   | 61601378 | 0.997 | 1 | 1 | t        | c | 0.0634 | 0.0773 | -0.0957 | 0.0569 | 0.09234 | -- |
| STE  | rs174462:61657666:G:A       | rs174462    | 61657666 | 0.979 | 1 | 1 | a        | g | 0.2403 | 0.2451 | 0.0304  | 0.0181 | 0.09242 | ++ |
| ELA  | rs174464_61657926           | rs174464    | 61657926 | 0.987 | 1 | 1 | a        | g | 0.3487 | 0.358  | 0.0816  | 0.0485 | 0.09248 | ++ |
| EDA  | rs2845573:61601908:A:G      | rs2845573   | 61601908 | 0.997 | 1 | 1 | a        | g | 0.9226 | 0.9366 | -0.0841 | 0.05   | 0.0927  | -- |
| EDA  | rs2845574:61601872:C:T      | rs2845574   | 61601872 | 0.997 | 1 | 1 | t        | c | 0.0634 | 0.0774 | 0.0841  | 0.05   | 0.09273 | ++ |
| DHA  | rs3834458:61594920:CT:C     | rs774882452 | 61594920 | 0.996 | 1 | 1 | ct       | c | 0.8157 | 0.8165 | 0.0527  | 0.0314 | 0.09283 | ++ |
| EIC9 | rs174450:61641542:G:T       | rs174450    | 61641542 | 0.959 | 1 | 1 | t        | g | 0.5806 | 0.5931 | 0.0499  | 0.0297 | 0.09296 | ++ |
| PUFA | rs174590:61616977:G:C       | rs174590    | 61616977 | 0.981 | 1 | 1 | c        | g | 0.1133 | 0.122  | 0.0788  | 0.0469 | 0.09302 | ++ |
| LIG  | rs108499:61547237:C:T       | rs108499    | 61547237 | 0.985 | 1 | 1 | t        | c | 0.1734 | 0.1744 | 0.0619  | 0.0368 | 0.09304 | ++ |
| OLE  | rs2845573:61601908:A:G      | rs2845573   | 61601908 | 0.997 | 1 | 1 | a        | g | 0.9226 | 0.9366 | 0.0347  | 0.0206 | 0.09307 | ++ |
| OLE  | rs174535                    | rs174535    | 61551356 | 1     | 1 | 1 | t        | c | 0.7936 | 0.803  | 0.0239  | 0.0142 | 0.09311 | ++ |
| EDA  | rs2524296:61601378:C:T      | rs2524296   | 61601378 | 0.997 | 1 | 1 | t        | c | 0.0634 | 0.0773 | 0.0841  | 0.0501 | 0.09316 | ++ |
| AA   | rs76095489:61664711:A:T     | rs76095489  | 61664711 | 0.907 | 1 | 1 | a        | t | 0.9297 | 0.9365 | -0.0605 | 0.036  | 0.09318 | -- |

|       |                                    |             |          |       |   |   |    |             |        |        |         |        |         |    |
|-------|------------------------------------|-------------|----------|-------|---|---|----|-------------|--------|--------|---------|--------|---------|----|
| OLE   | rs2845574:61601872:C:T             | rs2845574   | 61601872 | 0.997 | 1 | 1 | t  | c           | 0.0634 | 0.0774 | -0.0347 | 0.0206 | 0.09323 | -- |
| DGLA  | rs174595:61619893:C:T              | rs174595    | 61619893 | 0.996 | 1 | 1 | t  | c           | 0.1167 | 0.1239 | 0.0701  | 0.0418 | 0.09336 | ++ |
| EIC9  | rs174618                           | rs174618    | 61629322 | 1     | 1 | 1 | t  | c           | 0.714  | 0.72   | 0.0487  | 0.029  | 0.09336 | ++ |
| ARA   | rs174635:61647427:T:G              | rs174635    | 61647427 | 0.969 | 1 | 1 | t  | g           | 0.355  | 0.3658 | 0.0348  | 0.0208 | 0.09393 | ++ |
| MUFA  | rs2845573:61601908:A:G             | rs2845573   | 61601908 | 0.997 | 1 | 1 | a  | g           | 0.9226 | 0.9366 | 0.0344  | 0.0206 | 0.09423 | ++ |
| MUFA  | rs2845574:61601872:C:T             | rs2845574   | 61601872 | 0.997 | 1 | 1 | t  | c           | 0.0634 | 0.0774 | -0.0344 | 0.0206 | 0.0944  | -- |
| EPA   | rs2727270:61603237:C:T             | rs2727270   | 61603237 | 0.998 | 1 | 1 | t  | c           | 0.0765 | 0.1012 | -0.1278 | 0.0764 | 0.09444 | -- |
| OLE   | rs174567:61593005:A:G              | rs174567    | 61593005 | 0.998 | 1 | 1 | a  | g           | 0.8151 | 0.8152 | 0.0242  | 0.0144 | 0.0945  | ++ |
| PAL   | rs174537                           | rs174537    | 61552680 | 1     | 1 | 1 | t  | g           | 0.194  | 0.2002 | -0.0252 | 0.0151 | 0.09468 | -- |
| ALA   | rs174538                           | rs174538    | 61560081 | 0.998 | 1 | 1 | a  | g           | 0.1683 | 0.1741 | 0.1164  | 0.0697 | 0.09472 | ++ |
| EPA   | 11:61603358-A-T                    | rs2727271   | 61603358 | 1     | 1 | 1 | a  | t           | 0.8983 | 0.9235 | 0.1276  | 0.0764 | 0.09476 | ++ |
| PUFA6 | rs174589:61615803:C:G              | rs174589    | 61615803 | 0.973 | 1 | 1 | c  | g           | 0.8774 | 0.8859 | -0.0798 | 0.0478 | 0.09485 | -- |
| PLA   | 11:61647288-G-A                    | rs7942717   | 61647288 | 1     | 1 | 1 | a  | g           | 0.9008 | 0.9077 | -0.1086 | 0.065  | 0.095   | +- |
| LIG   | rs174559:61581656:G:A              | rs174559    | 61581656 | 0.999 | 1 | 1 | a  | g           | 0.1566 | 0.1611 | 0.0625  | 0.0374 | 0.0952  | ++ |
| OLE   | rs2524296:61601378:C:T             | rs2524296   | 61601378 | 0.997 | 1 | 1 | t  | c           | 0.0634 | 0.0773 | -0.0345 | 0.0207 | 0.09534 | -- |
| PLE   | rs174601                           | rs174601    | 61623140 | 1     | 1 | 1 | t  | c           | 0.2455 | 0.265  | 0.0565  | 0.0339 | 0.09536 | ++ |
| OLE   | 11:61593816-C-T                    | rs174568    | 61593816 | 1     | 1 | 1 | t  | c           | 0.1826 | 0.1827 | -0.0245 | 0.0147 | 0.0954  | -- |
| ARA   | rs174634:61647387:G:C              | rs174634    | 61647387 | 0.97  | 1 | 1 | c  | g           | 0.6341 | 0.6449 | -0.0346 | 0.0208 | 0.09565 | -- |
| PLE   | rs143352979:61620628:AAACA<br>AC:A | -           | 61620628 | 0.934 | 1 | 1 | a  | aaac<br>aac | 0.2703 | 0.2915 | 0.0573  | 0.0344 | 0.09609 | +- |
| DHA   | rs138766446:61602458:CCCA:C        | rs765564188 | 61602458 | 0.992 | 1 | 1 | ca | c           | 0.9218 | 0.9365 | 0.0734  | 0.0441 | 0.09618 | ++ |
| DGLA  | rs4564341:61573540:C:T             | rs4564341   | 61573540 | 0.935 | 1 | 1 | t  | c           | 0.0606 | 0.0673 | -0.0772 | 0.0464 | 0.09622 | -- |
| PAL   | rs174533:61549025:G:A              | rs174533    | 61549025 | 0.986 | 1 | 1 | a  | g           | 0.1988 | 0.2053 | -0.0246 | 0.0148 | 0.09641 | -- |
| PAL   | rs1151139:61671156:C:T             | rs1151139   | 61671156 | 0.986 | 1 | 1 | t  | c           | 0.2938 | 0.3011 | 0.021   | 0.0126 | 0.09661 | ++ |
| MUFA  | rs2524296:61601378:C:T             | rs2524296   | 61601378 | 0.997 | 1 | 1 | t  | c           | 0.0634 | 0.0773 | -0.0342 | 0.0206 | 0.0967  | -- |
| LIG   | rs72643557:61579427:C:T            | rs72643557  | 61579427 | 0.936 | 1 | 1 | t  | c           | 0.0607 | 0.0734 | -0.107  | 0.0644 | 0.09671 | -- |
| STE   | rs174454:61650747:G:A              | rs174454    | 61650747 | 0.963 | 1 | 1 | a  | g           | 0.6633 | 0.6834 | -0.0263 | 0.0158 | 0.09738 | -- |
| MYR   | rs2727270:61603237:C:T             | rs2727270   | 61603237 | 0.998 | 1 | 1 | t  | c           | 0.0765 | 0.1012 | 0.0917  | 0.0553 | 0.09753 | ++ |
| DTA   | rs174535                           | rs174535    | 61551356 | 1     | 1 | 1 | t  | c           | 0.7936 | 0.803  | 0.0665  | 0.0402 | 0.09763 | +- |



|      |                        |           |          |       |   |   |   |   |        |        |         |        |         |    |
|------|------------------------|-----------|----------|-------|---|---|---|---|--------|--------|---------|--------|---------|----|
| ARA  | rs174455               | rs174455  | 61656117 | 1     | 1 | 1 | a | g | 0.5959 | 0.6002 | -0.0327 | 0.0197 | 0.09776 | -- |
| MUFA | 11:61622227-T-C        | rs174600  | 61622227 | 0.996 | 1 | 1 | t | c | 0.7814 | 0.7847 | 0.0223  | 0.0135 | 0.09776 | ++ |
| MYR  | 11:61603358-A-T        | rs2727271 | 61603358 | 1     | 1 | 1 | a | t | 0.8983 | 0.9235 | -0.0916 | 0.0553 | 0.09795 | -- |
| LLA  | rs174618               | rs174618  | 61629322 | 1     | 1 | 1 | t | c | 0.714  | 0.72   | -0.0686 | 0.0415 | 0.0981  | -- |
| DHA  | rs7394579:61581450:A:G | rs7394579 | 61581450 | 0.984 | 1 | 1 | a | g | 0.8415 | 0.8467 | 0.0547  | 0.0331 | 0.09815 | ++ |
| STE  | rs4564341:61573540:C:T | rs4564341 | 61573540 | 0.935 | 1 | 1 | t | c | 0.0606 | 0.0673 | -0.0478 | 0.0289 | 0.09817 | -- |
| OLE  | rs174564:61588305:A:G  | rs174564  | 61588305 | 1     | 1 | 1 | a | g | 0.8146 | 0.8152 | 0.0239  | 0.0144 | 0.09822 | ++ |
| DPA6 | rs174579               | rs174579  | 61605613 | 0.998 | 1 | 1 | t | c | 0.0912 | 0.1069 | -0.0799 | 0.0484 | 0.09854 | -- |
| LIG  | rs174564:61588305:A:G  | rs174564  | 61588305 | 1     | 1 | 1 | a | g | 0.8146 | 0.8152 | -0.0588 | 0.0356 | 0.0986  | -- |
| OLE  | rs174601               | rs174601  | 61623140 | 1     | 1 | 1 | t | c | 0.2455 | 0.265  | -0.0212 | 0.0128 | 0.0988  | -- |
| EIC9 | rs174458:61656995:C:T  | rs174458  | 61656995 | 1     | 1 | 1 | t | c | 0.6214 | 0.6259 | 0.0482  | 0.0292 | 0.09913 | ++ |
| DPA  | 11:61647288-G-A        | rs7942717 | 61647288 | 1     | 1 | 1 | a | g | 0.9008 | 0.9077 | 0.1064  | 0.0646 | 0.09933 | ++ |
| MUFA | rs174582               | rs174582  | 61607168 | 1     | 1 | 1 | a | g | 0.8891 | 0.9021 | 0.0343  | 0.0208 | 0.09942 | ++ |
| PLE  | rs174463:61657838:G:A  | rs174463  | 61657838 | 0.988 | 1 | 1 | a | g | 0.6465 | 0.6513 | 0.0531  | 0.0323 | 0.09943 | ++ |

All SNP x FA combinations in the FADS1/2/3 region are listed where  $p < 0.1$

All fatty acids were  $\log(\text{FA})$  phenotypes *except*  $\text{sqrt}(\text{PUFA6/PUFA3}) - \text{SQRAT63}$

NB: Effect size (beta) and standard errors have NOT been transformed from the  $\log()$  or  $\text{sqrt}()$  transformed phenotypes

Columns:

|            |                                                                    |
|------------|--------------------------------------------------------------------|
| FA         | Fatty Acid Phenotype                                               |
| MarkerName | Unique marker name as tested (for consistency between two studies) |
| rs#        | dbSNP rs# If available                                             |
| pos        | position                                                           |
| minInfo    | Minimum IMPUTE info between the two studies                        |

|         |                                     |
|---------|-------------------------------------|
| InProv  | SNP in PROVIDE set (passed QC) 1/0  |
| InCryp  | SNP in Crypto (passed QC) 1/0       |
| A1      | Ref Allele                          |
| A2      | Alt Allele                          |
| MinFreq | Minimum frequency of A1             |
| MaxFreq | Maximum frequency of A1             |
| Effect  | untransformed beta for A1           |
| StdErr  | untransformed beta standard error   |
| P-value | P-value for SNP                     |
| Dir     | direction of effect for two studies |
